# Supplementary material for: Acute and long-term effects of repetitive transcranial magnetic stimulation in major depressive episodes: a systematic review and dose-response meta-analysis of randomized sham-controlled trials
Source: Research Square preprint supplement (doi:10.21203/rs.3.rs-8648926/v1), 2026-02-02
Supplement: Supplementary file 1 [file 7c6fcff7ca856aa72a9b3209.docx]

**Acute and long-term effects of repetitive transcranial magnetic stimulation in major depressive episodes: a systematic review and dose-response meta-analysis of randomized sham-controlled trials**

**Supplementary Material**

**Search strategy**

**Sensitivity analysis**

**Table S1**. Characteristics of included randomized sham-controlled trials in this study

**Table S2**. Quality assessment of the included articles.

**Table S3**. Dose-response associations of rTMS with total pulses for depressive symptoms, treatment response, and remission.

**Table S4**. Dose-response associations of rTMS with pulses per session for depressive symptoms, treatment response, and remission.

**Table S5**. Dose-response associations of rTMS with total sessions for depressive symptoms, treatment response, and remission.

**Table S6**. Dose-response associations of rTMS with treatment duration (week) for depressive symptoms, treatment response, and remission.

**Table S7**. Dose-response associations of rTMS subgroup with total pulses for depressive symptoms, treatment response, and remission.

**Table S8**. Dose-response associations of TBS subgroup with total pulses for depressive symptoms, treatment response, and remission.

**Table S9**. Dose-response associations of rTMS subgroup with pulses per session for depressive symptoms, treatment response, and remission.

**Table S10**. Dose-response associations of TBS subgroup with pulses per session for depressive symptoms, treatment response, and remission.

**Table S11**. Dose-response associations of rTMS subgroup with total sessions for depressive symptoms, treatment response, and remission.

**Table S12**. Dose-response associations of TBS subgroup with total sessions for depressive symptoms, treatment response, and remission.

**Table S13**. Dose-response associations of rTMS subgroup with treatment duration (week) for depressive symptoms, treatment response, and remission.

**Table S14**. Dose-response associations of TBS subgroup with treatment duration (week) for depressive symptoms, treatment response, and remission.

**Table S15**. Tests of Heterogeneity and Publication Bias Across rTMS Dosing Parameters and Clinical Outcomes.

**Fig. S1**. Summary of risk of bias across the 108 included studies.

**Fig. S2**. Dose-response associations of rTMS subgroup with total pulses across depressive-symptom, treatment-response, and remission outcomes.

**Fig. S3**. Dose-response associations of rTMS subgroup with pulses per session across depressive-symptom, treatment-response, and remission outcomes.

**Fig. S4**. Dose-response associations of rTMS subgroup with total sessions across depressive-symptom, treatment-response, and remission outcomes.

**Fig. S5**. Dose-response associations of rTMS subgroup with treatment duration (week) across depressive-symptom, treatment-response, and remission outcomes.

**Fig. S6**. Dose-response associations of TBS subgroup with total pulses across depressive-symptom, treatment-response, and remission outcomes.

**Fig. S7**. Dose-response associations of TBS subgroup with pulses per session across depressive-symptom, treatment-response, and remission outcomes.

**Fig. S8**. Dose-response associations of TBS subgroup with total sessions across depressive-symptom, treatment-response, and remission outcomes.

**Fig. S9**. Dose-response associations of TBS subgroup with treatment duration (week) across depressive-symptom, treatment-response, and remission outcomes.

**Fig. S10**. Leave-one-out sensitivity analyses for total-pulse-based dose-response models of rTMS.

**Fig. S11.** Leave-one-out sensitivity analyses for pulses-per-session–based dose–response models of rTMS.

**Fig. S12**. Leave-one-out sensitivity analyses for total-sessions–based dose–response models of rTMS.

**Fig. S13**. Leave-one-out sensitivity analyses for treatment-duration–based dose–response models of rTMS.

**Fig. S14**. Funnel plots of publication bias for total-pulse–based rTMS dose-response analyses across outcomes.

**Fig. S15**. Funnel plots of publication bias for pulse-per-session–based rTMS dose-response analyses across outcomes.

**Fig. S16**. Funnel plots of publication bias for total-sessions–based rTMS dose-response analyses across outcomes.

**Fig. S17**. Funnel plots of publication bias for treatment-duration–based rTMS dose-response analyses across outcomes.

**Search strategy**

**CENTRAL** - Cochrane Central Register of Controlled Trials: 1310

#1 "depression" OR "depressive disorder" OR "major depressive disorder" OR "unipolar depression" OR "depressive symptom*"

#2 "transcranial magnetic stimulation" OR TMS OR rTMS OR "magnetic stimulation"

#3 random* OR trial* OR sham

#4 #1 AND #2 AND #3

**Embase**: 5076

#1'depression'/exp OR 'major depression'/exp OR 'depressive disorder'/exp OR ("major depressive disorder":ti,ab OR "depressive disorder":ti,ab OR depression:ti,ab OR depressive:ti,ab OR "unipolar depression":ti,ab OR "depressive symptom*":ti,ab)

#2 'transcranial magnetic stimulation'/exp OR 'transcranial magnetic stimulation':ti,ab OR tms:ti,ab OR rtms:ti,ab OR 'magnetic stimulation':ti,ab

#3 'randomized controlled trial'/exp OR 'clinical trial'/exp OR random*:ti,ab OR trial*:ti,ab OR placebo:ti,ab OR sham:ti,ab

#4 #1 AND #2 AND #3

**PubMed**: 567

#1 ("depressive disorder"[MeSH Terms]) OR (“Depression” [Mesh terms]) OR ("Major Depressive Disorder"[Title/Abstract]) OR ("Depressive Disorder"[Title/Abstract]) OR ("Depressive"[Title/Abstract]) OR ("Unipolar Depression"[Title/Abstract]) OR ("Depression"[Title/Abstract]) OR ("Depressive Symptom"[Title/Abstract])

#2 ("Transcranial Magnetic Stimulation"[MeSH Terms]) OR ("Magnetic Stimulation "[Title/Abstract]) OR ("Transcranial Magnetic Stimulation"[Title/Abstract])

#3 ("Randomized Controlled Trial"[Publication Type] OR "randomized controlled trial"[Title/Abstract] OR "randomised controlled trial"[Title/Abstract] OR "RCT"[Title/Abstract] OR "random allocation"[Title/Abstract] OR "randomly assigned"[Title/Abstract])

#4 #1 AND #2 AND #3

**Sensitivity analysis**

**Total pulses**

**Acute depressive symptom severity**. Because both the overall and non-linearity tests were significant, we assessed the robustness of the maximum effective dose (EDmax). Leave-one-out analyses showed a highly stable interior maximum: the full-sample EDmax was approximately 30,800 pulses; across 105 refits, EDmax clustered near 30,800 (IQR 30,500–31,300). Only 1 of 105 refits (0.95%) showed no interior maximum (that is, a monotonic increase or plateau within the observed range), supporting the stability of the mid-to-high-dose peak and subsequent plateau.

**Follow-up depressive symptom severity**. The overall association was significant but the test for non-linearity was not. Sensitivity analyses therefore focused on the linear slope and model specification. Leave-one-out refits yielded a stable slope (median 0.645 SMD per 10,000 pulses; IQR 0.631–0.653) with no sign reversals and no loss of significance. Model comparison modestly favoured the linear over the spline form (AIC linear = 208.5 vs AIC spline = 211.1; ΔAIC = 2.5).

**Acute response**. With significant overall and non-linearity tests, EDmax stability was examined. The full-sample curve showed a clear interior EDmax at approximately 37,400 pulses. Leave-one-out refits produced virtually identical optima (median 37,400; IQR 37,400–37,800 pulses), and all refits retained an interior peak (0% without a peak), indicating a highly robust optimum.

**Follow-up response**. With significant overall and non-linearity tests in the log-risk-ratio model, the full-sample curve showed an interior maximum at approximately 32,400 pulses. Leave-one-out refits yielded closely similar optima (median 32,500; IQR 31,800–32,900 pulses), and all refits preserved an interior peak, indicating robustness to exclusion of any single trial.

**Acute remission**. Both overall and non-linearity tests were significant. The full-sample EDmax occurred at approximately 39,000 pulses. Leave-one-out analyses returned identical optima across all refits (median 39,000; IQR 37,020–40,020 pulses), with no loss of the interior peak, again supporting a highly robust optimum.

**Follow-up remission**. The overall association was significant whereas the non-linearity test was not; sensitivity analyses therefore targeted slope robustness and model choice. Leave-one-out slopes were stable (median 0.065 change in log(RR) per 10,000 pulses; IQR 0.059–0.073) with no sign reversals, though some refits lost significance at alpha = 0.05. Despite a Wald test suggesting non-linearity (chi-square = 6.60, df = 2; p = 0.0369), model fit strongly favoured a linear specification (AIC linear = 44.0 vs AIC spline = 67.1; ΔAIC = 23.1).

**Pulses per session**

**Acute depressive symptom severity.** The full-sample curve showed a clear interior EDmax at 1,804.5 pulses per session. Leave-one-out refits yielded virtually the same optimum (median 1,804.5; IQR 1,784.5–1,824.6). Only about 2 percent of refits (2 of 105) lost the interior peak, indicating that the location of the acute optimum is highly robust to exclusion of any single study.

**Follow-up depressive symptom severity.** The full-sample curve had an interior EDmax at 1,273.2 pulses per session. Leave-one-out refits gave nearly identical optima (median 1,268.2; IQR 1,253.1–1,303.3), and every refit retained an interior peak (0 percent without a peak). These results indicate a highly robust follow-up optimum.

**Acute response.** The full-sample curve showed an interior EDmax at 2,173.9 pulses per session. Leave-one-out refits yielded identical optima (median 2,173.9; IQR 2,173.9–2,173.9), and every refit retained an interior peak (0 percent without a peak), indicating that the acute-response optimum is exceptionally robust to the exclusion of any single study.

**Follow-up response.** The full-sample curve peaked at an interior EDmax of 1,615 pulses per session. Leave-one-out refits produced virtually identical optima (median 1,615; IQR 1,615–1,621.2), and all refits retained an interior peak (0 percent without a peak), indicating a highly robust follow-up response optimum.

**Acute remission.** The full-sample curve peaked at an interior EDmax of 1,799 pulses per session. Leave-one-out refits yielded identical optima (median 1,799; IQR 1,799–1,799), and all refits retained an interior peak (0 percent without a peak), indicating an exceptionally robust acute remission optimum.

**Follow-up remission.** The full-sample curve peaked at an interior EDmax of 1,839 pulses per session. Leave-one-out refits yielded near-identical optima (median 1,843; IQR 1,821–1,849), and every refit retained an interior peak (0 percent without a peak), indicating a highly robust follow-up remission optimum.

**Total sessions**

**Acute depressive symptom severity**. The full-sample curve peaked at an interior EDmax of 14 sessions. Leave-one-out refits produced virtually identical optima (median 14; IQR 14–14), and every refit retained an interior peak (0 percent without a peak), indicating a highly robust session-level optimum for acute symptom improvement.

**Follow-up depressive-symptom severity**. The overall association was significant while the test for non-linearity was not. Sensitivity analyses therefore targeted the linear slope and model form. Leave-one-out refits showed a stable slope of 0.086 SMD per additional session (median 0.087; IQR 0.085–0.089) with no sign reversals and no loss of significance. Model comparison favored the linear over the spline specification (AIC linear 155.6 vs AIC spline 162.5; ΔAIC 6.8).

**Acute response.** The dose–response curve showed a clear interior optimum at 16 sessions; leave-one-out refits yielded the same optimum (median 16; IQR 11–20). Most refits retained an interior peak, although 16.1% became monotonic within the observed range, indicating that the peak is generally robust but exhibits some sensitivity to the exclusion of individual trials.

**Follow-up response**. The overall association was significant while the test for non-linearity was not. Sensitivity analyses therefore targeted the linear slope and model form. Leave-one-out refits showed a stable slope of 0.0307 in log(RR) per additional session (median 0.0307; IQR 0.0246–0.0331) with no sign reversals and no loss of significance; on the RR scale, this is ≈3.1% higher response per extra session. Model comparison favored the linear over the spline specification (AIC linear 45.2 vs AIC spline 53.3; ΔAIC 8.1).

**Acute remission**. The dose–response curve showed a clear interior optimum at 23 sessions. Leave-one-out analyses yielded virtually identical optima (median 23; IQR 23–23 sessions), and every refit retained an interior peak (0% without a peak), indicating that the estimated EDmax is highly robust to exclusion of any single study.

**Follow-up remission.** This model was not significant, and no sensitivity analysis was conducted**.**

**Treatment duration**

**Acute depressive-symptom severity**. The dose–response curve showed a clear interior optimum at 2.9 weeks. Leave-one-out refits were identical (median 2.9; IQR 2.8–2.9 weeks), and every refit retained an interior peak (0% without), indicating the estimated EDmax is highly robust.

**Follow-up depressive-symptom severity**. The overall association was significant while the test for non-linearity was not. Sensitivity analyses therefore emphasized model form and slope stability. Leave-one-out refits showed a stable positive slope of 0.475 SMD per additional week (median 0.484; IQR 0.470–0.490) with no sign reversals and no loss of significance. Model comparison did not clearly favor either specification (AIC linear 164.9 vs AIC spline 164.6; ΔAIC −0.2).

**Acute response**. With a significant overall association and non-linearity, sensitivity analyses targeted EDmax. The full-sample curve peaked at 2.8 weeks; leave-one-out refits produced identical optima (median 2.8; IQR 2.7–2.9 weeks), and no refit lost the interior peak (0%). This indicates a highly robust short-duration optimum.

**Follow-up response**. With a significant overall association and non-linearity, sensitivity analyses focused on EDmax. The full-sample optimum was 2.9 weeks; leave-one-out refits yielded identical optima (median 2.9; IQR 2.4–3.1 weeks), and no refit lost the interior peak (0%). This indicates a highly robust short-duration optimum.

**Acute remission**. With a significant overall association and non-linearity, sensitivity analyses targeted EDmax. The full-sample optimum was 3.1 weeks; leave-one-out refits gave identical optima (median 3.1; IQR 3.1–3.1 weeks), and 0% of refits lost the interior peak—indicating a highly robust short-duration optimum.

**Follow-up remission**. With a significant overall association and non-linearity, we examined EDmax robustness. The full-sample optimum was 3.3 weeks; leave-one-out refits yielded identical optima (median 3.3; IQR 3.3–3.3 weeks), and 0% of refits lost the interior peak—indicating a highly robust short-duration optimum.

**Table S1**. Characteristics of included randomized sham-controlled trials in this study.

| Author, year, country | Treatment (sham control method) | Diagnosis | Diagnostic criteria | Treatment resistant | Sample size (randomized/completed) | Sex (male/female) | Age (mean, SD) | Rating scale | Depression severity (mean, SD) | Medication status | Washout period | Stimulated Brain Region | Frequency (Hz) | Intensity (MT%) | Pulses per session (total sessions) | Total pulses | Treatment duration |
| --- | --- | --- | --- | --- | --- | --- | --- | --- | --- | --- | --- | --- | --- | --- | --- | --- | --- |
| Akpinar et al., 2022, Turkey[1] | rTMS | MDD | DSM-V | Yes | 20/20 | 3/17 | 43.7 ± 14.2 | HAMD-17 | 20.0 ± 3.3 | Stable SNRIs | No | Left DLPFC | 10 Hz | 110% | 1,000 (20) | 20,000 | 2 weeks |
| Sham (rotation 45°) | MDD | DSM-V | Yes | 18/18 | 3/15 | 45.6 ± 7.8 | HAMD-17 | 20.5 ± 3.4 | Stable SNRIs | No |  |  |  |  |  |  |
| Anderson et al., 2007, UK[2] | rTMS | MDD | DSM-IV | Yes | 13/11 | 6/7 | 48.0 ± 8.0 | MADRS | 26.7 ± 3.6 | Stable Psychotropic drugs | No | Left DLPFC | 10 Hz | 110% | 1,000 (12–18) | 12,000–18,000 | 4–6 weeks |
| Matched sham coil | MDD | DSM-IV | Yes | 16/14 | 7/9 | 46.0 ± 12.0 | MADRS | 27.7 ± 7.1 | Stable Psychotropic drugs | No |  |  |  |  |  |  |
| Armas-Castañeda et al., 2021, Mexico[3] | rTMS | MDD | DSM-IV | No | 25/25 | 7/18 | 23.5 ± 5.3 | HAMD-21 | 26.8 ± 4.1 | Drug-free | Yes | Left DLPFC | 5 Hz | 110% | 1,500 (15) | 22,500 | 3 weeks |
| Matched sham coil | MDD | DSM-IV | No | 22/22 | 5/17 | 21.3 ± 2.4 | HAMD-21 | 29.4 ± 5.4 | Drug-free | Yes |  |  |  |  |  |  |
| rTMS | MDD | DSM-IV | No | 22/22 | 5/17 | 21.2 ± 3.3 | HAMD-21 | 27.2 ± 3.9 | Drug-free | Yes | Left DLPFC | 5 Hz | 110% | 1,500 (15) | 22,500 | 7 weeks |
| Matched sham coil | MDD | DSM-IV | No | 22/22 | 8/14 | 22.1 ± 3.9 | HAMD-21 | 27.7 ± 4.4 | Drug-free | Yes |  |  |  |  |  |  |
| Asgharian Asl & Vaghef, 2022, Iran[4] | rTMS | MDD | DSM-IV | No | 14/14 | 0/14 | 36.3 ± 8.8 | BDI-II | 36.3 ± 8.3 | Stable Psychotropic drugs | No | Left DLPFC | 20 Hz | 85% | 2,500 (10) | 25,000 | 2 weeks |
| Sham (rotation 90°) | MDD | DSM-IV | No | 14/14 | 0/14 | 34.5 ± 9.5 | BDI-II | 37.4 ± 10.9 | Stable Psychotropic drugs | No |  |  |  |  |  |  |
| Avery et al., 2006, USA[5] | rTMS | MDD | DSM-IV | Yes | 35/33 | 14/21 | 44.3 ± 10.3 | HAMD-17 | 23.5 ± 3.9 | Stable Psychotropic drugs | No | Left DLPFC | 10 Hz | 110% | 1,600 (15) | 24,000 | 3 weeks |
| Sham (rotation 90°) | MDD | DSM-IV | Yes | 33/30 | 17/16 | 44.2 ± 9.7 | HAMD-17 | 23.5 ± 2.9 | Stable Psychotropic drugs | No |  |  |  |  |  |  |
| Bakim et al., 2012, Turkey[6] | rTMS | MDD | DSM-V | Yes | 12/12 | 2/10 | 38.7 ± 10.0 | HAMD-17 | 23.1 ± 3.6 | Stable SNRIs/SSRIs | No | Left DLPFC | 20 Hz | 80% | 800 (30) | 24,000 | 6 weeks |
| rTMS | MDD | DSM-V | Yes | 11/11 | 1/10 | 43.1 ± 8.2 | HAMD-17 | 24.1 ± 2.8 | Stable SNRIs/SSRIs | No | Left DLPFC | 20 Hz | 110% | 800 (30) | 24,000 | 6 weeks |
| Sham (rotation 45°) | MDD | DSM-V | Yes | 12/12 | 1//11 | 44.4 ± 10.2 | HAMD-17 | 25.6 ± 3.8 | Stable SNRIs/SSRIs | No |  |  |  |  |  |  |
| Bengtsson et al., 2023, Sweden[7] | iTBS | MDD | DSM-IV | No | 25/25 | 11/14 | 27.0 ± 9.6 | MADRS-S | 29.2 ± 8.3 | Stable Psychotropic drugs | No | DMPFC | 50 Hz bursts at 5 Hz | 90% | 1,200 (20) | 24,000 | 2 weeks |
| Matched sham coil | MDD | DSM-IV | No | 24/24 | 10/14 | 27.0 ± 8.5 | MADRS-S | 30.1 ± 7.3 | Stable Psychotropic drugs | No |  |  |  |  |  |  |
| Bengtsson et al., 2023, Sweden[8] | iTBS | MDD | DSM-IV | No | 25/24 | 11/14 | 27.0 ± 9.6 | MADRS-S | 30.0 ± 8.0 | Stable Psychotropic drugs | No | DMPFC | 50 Hz bursts at 5 Hz | 90% | 1,200 (20–30) | 24,000–36,000 | 2–3 weeks |
| Matched sham coil | MDD | DSM-IV | No | 24/23 | 10/14 | 27.0 ± 8.5 | MADRS-S | 30.0 ± 7.0 | Stable Psychotropic drugs | No |  |  |  |  |  |  |
| Berman et al., 2000, USA[9] | rTMS | MDD | DSM-IV | Yes | 10/10 | 8/2 | 44.5 | HAMD-25 | 37.2 ± 2.0 | Drug-free | Yes | Left DLPFC | 20 Hz | 80% | 800 (10) | 8,000 | 2 weeks |
| Matched sham coil | MDD | DSM-IV | Yes | 10/10 | 7/3 | 41.5 | HAMD-25 | 37.2 ± 2.0 | Drug-free | Yes |  |  |  |  |  |  |
| Blumberger et al., 2012, Canada[10] | rTMS | MDD | DSM-IV | Yes | 26/22 | 12/14 | 58.0 ± 12.5 | HAMD-17 | 25.1 ± 3.8 | Stable Psychotropic drugs | No | Bilateral DLPFC | Right 1 Hz; Left 10 Hz | Right: 100%, Left: 110% | 1,215 (15–30) | 18,225– 36,450 | 3–6 weeks |
| rTMS | MDD | DSM-IV | Yes | 22/12 | 10/12 | 48.9 ± 13.4 | HAMD-17 | 26.0 ± 3.3 | Stable Psychotropic drugs | No | Left DLPFC | 10 Hz | Right: 100%, Left: 110% | 1,450 (15–30) | 21,750– 43,500 | 3–6 weeks |
| Sham (rotation 90°) | MDD | DSM-IV | Yes | 20/15 | 6/14 | 45.8 ± 13.4 | HAMD-17 | 25.2 ± 2.8 | Stable Psychotropic drugs | No |  |  |  |  |  |  |
| Boutros et al., 2002, USA[11] | rTMS | MDD | DSM-IV | Yes | 12/11 | 8/4 | 49.5 ± 8.0 | HAMD-25 | 34.4 ± 10.1 | Stable Psychotropic drugs | No | Left DLPFC | 20 Hz | 80% | 800 (10) | 8,000 | 2 weeks |
| Sham (rotation 90°) | MDD | DSM-IV | Yes | 9/7 | 8/1 | 52.0 ± 7.0 | HAMD-25 | 31.7 ± 4.9 | Stable Psychotropic drugs | No |  |  |  |  |  |  |
| Bretlau et al., 2008, Denmark[12] | rTMS | MDD | DSM-IV | Yes | 25/22 | 7/15 | 53.1 ± 10.1 | HAMD-17 | 25.3 ± 3.0 | Escitalopram | Yes | Left DLPFC | 8 Hz | 90% | 1,280 (15) | 19,200 | 3 weeks |
| Matched sham coil | MDD | DSM-IV | Yes | 24/23 | 10/13 | 57.8 ± 10.0 | HAMD-17 | 24.8 ± 3.2 | Escitalopram | Yes |  |  |  |  |  |  |
| Buchholtz Hansen et al., 2004, Denmark[13] | rTMS | Mixed | DSM-IV | No | 8/6 | 4/2 | 46.2 ± 14.8 | HAMD-17 | 25.2 ± 4.5 | Stable Psychotropic drugs | No | Left DLPFC | 20 Hz | 90% | 2,000 (15) | 30,000 | 3 weeks |
| Sham (rotation 90°) | Mixed | DSM-IV | No | 7/7 | 5/2 | 50.7 ± 13.3 | HAMD-17 | 23.7 ± 6.4 | Stable Psychotropic drugs | No |  |  |  |  |  |  |
| Carpenter et al., 2017, USA[14] | rTMS | MDD | DSM-IV | Yes | 47/38 | 13/34 | 45.6 ± 12.0 | HAMD-24 | 31.3 ± 5.5 | Stable antidepressants | No | Left DLPFC | 10 Hz | 120% | 3,000 (20) | 60,000 | 4 weeks |
| Matched sham coil | MDD | DSM-IV | Yes | 45/37 | 10/35 | 47.6 ± 13.1 | HAMD-24 | 31.1 ± 6.8 | Stable antidepressants | No |  |  |  |  |  |  |
| Chen et al., 2013, China[15] | rTMS | MDD | DSM-IV | Yes | 10/10 | 3/7 | 44.1 ± 4.4 | HAMD-17 | 23.5 ± 1.9 | Stable antidepressants | No | Left DLPFC | 20 Hz | 90% | 800 (10) | 8,000 | 2 weeks |
| Sham (rotation 90°) | MDD | DSM-IV | Yes | 10/10 | 6/4 | 47.3 ± 3.5 | HAMD-17 | 24.9 ± 1.9 | Stable antidepressants | No |  |  |  |  |  |  |
| Cheng et al., 2022, China[16] | Prolonged iTBS | MDD | DSM-IV | No | 26/26 | 9/17 | 46.7 ± 14.5 | HAMD-17 | 21.8 ± 3.1 | Drug-free | Yes | Left DLPFC | 50 Hz bursts at 5 Hz | 80% | 1,800 (10) | 18,000 | 2 weeks |
| rTMS | MDD | DSM-IV | No | 23/23 | 8/15 | 48.2 ± 14.1 | HAMD-17 | 23.4 ± 4.0 | Drug-free | Yes | Left DLPFC | 10 Hz | 100% | 1,600 (10) | 16,000 | 2 weeks |
| Matched sham coil | MDD | DSM-IV | No | 26/26 | 5/21 | 45.4 ± 12.4 | HAMD-17 | 23.4 ± 3.2 | Drug-free | Yes |  |  |  |  |  |  |
| Cheng et al., 2022, China[17] | Standard iTBS | MDD | DSM-IV | Yes | 11/11 | 5/6 | 46.0 ± 15.0 | HAMD-17 | 24.0 ± 5.0 | Drug-free | Yes | DMPFC | 50 Hz bursts at 5 Hz | 80% | 600 (30) | 18,000 | 3 weeks |
| Prolonged iTBS | MDD | DSM-IV | Yes | 12/12 | 5/7 | 46.0 ± 18.0 | HAMD-17 | 25.0 ± 6.0 | Drug-free | Yes | DMPFC | 50 Hz bursts at 5 Hz | 80% | 1,800 (30) | 54,000 | 3 weeks |
| Matched sham coil | MDD | DSM-IV | Yes | 11/11 | 4/7 | 47.0 ± 16.0 | HAMD-17 | 24.0 ± 4.0 | Drug-free | Yes |  |  |  |  |  |  |
| Chistyakov et al., 2015, Israel[18] | Continuous TBS | Mixed | DSM-IV | No | 15/15 | 5/10 | 52.7 ± 11.1 | HAMD-21 | 26.7 ± 3.9 | Stable Psychotropic drugs | No | Right DLPFC | 50 Hz bursts at 5 Hz | 100% | 3,600 (10) | 36,000 | 2 weeks |
| Matched sham coil | Mixed | DSM-IV | No | 14/13 | 6/8 | 50.9 ± 17.3 | HAMD-21 | 24.8 ± 3.2 | Stable Psychotropic drugs | No |  |  |  |  |  |  |
| Chou et al., 2020, China[19] | TBS | MDD | DSM-IV | No | 30/27 | 12/15 | 43.6 ± 16.6 | HAMD-21 | 24.3 ± 3.9 | Benzodiazepine | Yes | Bilateral DLPFC | 50 Hz bursts at 5 Hz | 80% | 1,200 (10) | 12,000 | 3 weeks |
| Matched sham coil | MDD | DSM-IV | No | 30/26 | 11/15 | 42.3 ± 11.1 | HAMD-21 | 24.8 ± 5.3 | Benzodiazepine | Yes |  |  |  |  |  |  |
| Chou et al., 2023, China[20] | TBS | MDD | DSM-IV | No | 17/17 | 8/9 | 49.2 ± 14.9 | HAMD-21 | 24.4 ± 3.0 | Stable antidepressants | No | Bilateral DLPFC | 50 Hz bursts at 5 Hz | 80% | 1,200 (10) | 12,000 | 2 weeks |
| Matched sham coil | MDD | DSM-IV | No | 11/11 | 5/6 | 43.5 ± 12.1 | HAMD-21 | 25.1 ± 6.9 | Stable antidepressants | No |  |  |  |  |  |  |
| Cole et al., 2022, USA[21] | Accelerated iTBS | MDD | DSM-IV | Yes | 14/14 | 9/5 | 49.0 ± 15.0 | MADRS | 31.0 ± 4.0 | Stable antidepressants | No | Left DLPFC | 50 Hz bursts at 5 Hz | 90% | 1,800 (50) | 90,000 | 1 week |
| Matched sham coil | MDD | DSM-IV | Yes | 15/15 | 10/5 | 52.0 ± 16.0 | MADRS | 35.0 ± 6.0 | Stable antidepressants | No |  |  |  |  |  |  |
| Concerto et al., 2015, Italy[22] | rTMS | MDD | DSM-IV | Yes | 15/15 | 9/6 | 51.0 ± 6.5 | HAMD-21 | 22.3 ± 2.2 | Stable Psychotropic drugs | No | Left DLPFC | 10 Hz | 120% | 3,000 (20) | 60,000 | 4 weeks |
| Sham (rotation 45°) | MDD | DSM-IV | Yes | 15/15 | 8/7 | 53.0 ± 6.7 | HAMD-21 | 21.0 ± 1.05 | Stable Psychotropic drugs | No |  |  |  |  |  |  |
| Dai et al., 2021, China[23] | rTMS | MDD | ICD-10 | No | 55/40 | 13/27 | 44.5 ± 9.1 | HAMD-21 | 34.8 ± 5.4 | Escitalopram | No | Left DLPFC | 10 Hz | 100% | 8,000 (20) | 160,000 | 4 weeks |
| Sham (rotation 90°) | MDD | ICD-10 | No | 55/49 | 16/33 | 42.1 ± 9.5 | HAMD-21 | 33.9 ± 7.7 | Escitalopram | No |  |  |  |  |  |  |
| Dellink et al., 2024, Belgium[24] | Continuous TBS | BD | DSM-IV | No | 18/18 | 5/13 | 48.0 ± 7.0 | HAMD-17 | 21.9 ± 3.9 | Stable Psychotropic drugs | No | Right DLPFC | 50 Hz bursts at 5 Hz | 110% | 900 (20) | 18,000 | 4 days |
| Matched sham coil | BD | DSM-IV | No | 19/19 | 6/13 | 51.0 ± 14.0 | HAMD-17 | 22.0 ± 3.0 | Stable Psychotropic drugs | No |  |  |  |  |  |  |
| Dunlop et al., 2020, Canada[25] | rTMS | MDD | DSM-IV | Yes | 38/35 | 78/120 | 39.4 ± 11.6 | HAMD-17 | 22.5 ± 3.5 | Stable Psychotropic drugs | No | DMPFC | 20 Hz | 120% | 3040 (30) | 91,200 | 15 days |
| rTMS | MDD | DSM-IV | Yes | 41/37 | HAMD-17 | 22.0 ± 3.5 | Stable Psychotropic drugs | No | DMPFC | 1 Hz | 120% | 720 (30) | 21,600 | 15 days |
| Matched sham coil | MDD | DSM-IV | Yes | 41/36 | HAMD-17 | 22.3 ± 2.8 | Stable Psychotropic drugs | No |  |  |  |  |  |  |
| Duprat et al., 2016, Belgium[26] | Accelerated iTBS | MDD | ICD-10 | Yes | 22/22 | 8/14 | 41.7 ± 11.8 | HAMD-17 | 21.1 ± 4.7 | Benzodiazepine | Yes | Left DLPFC | 50 Hz bursts at 5 Hz | 110% | 1,620 (20) | 32,400 | 4 days |
| Matched sham coil | MDD | ICD-10 | Yes | 25/25 | 10/15 | HAMD-17 | 21.5 ± 6.3 | Benzodiazepine | Yes |  |  |  |  |  |  |
| Eschweiler et al., 2000, Germany[25, 27] | rTMS | MDD | DSM-IV | No | 5/5 | NA | 57.0 ± 8.0 | HAMD-21 | 27.4 ± 4.6 | Stable Psychotropic drugs | No | Left DLPFC | 10 Hz | 90% | 2,000 (5) | 10,000 | 1 week |
| Sham (rotation 90°) | MDD | DSM-IV | No | 5/5 | NA | HAMD-21 | 20.2 ± 3.8 | Stable Psychotropic drugs | No |  |  |  |  |  |  |
| Fitzgerald et al., 2003, Australia[28] | rTMS | Mixed | DSM-IV | Yes | 20/20 | 12/8 | 42.2 ± 9.8 | MADRS | 36.1 ± 7.5 | Stable Psychotropic drugs | No | Left DLPFC | 10 Hz | 100% | 1,000 (10) | 10,000 | 2 weeks |
| rTMS | Mixed | DSM-IV | Yes | 20/20 | 13/7 | 45.6 ± 11.5 | MADRS | 37.7 ± 8.4 | Stable Psychotropic drugs | No | Right DLPFC | 1 Hz | 100% | 300 (10) | 3,000 | 2 weeks |
| Sham (rotation 45°) | Mixed | DSM-IV | Yes | 20/20 | 9/11 | 49.2 ± 14.2 | MADRS | 35.7 ± 8.1 | Stable Psychotropic drugs | No |  |  |  |  |  |  |
| Fitzgerald et al., 2006, Australia[29] | rTMS | Mixed | DSM-IV | No | 25/25 | 10/15 | 46.8 ± 10.7 | MADRS | 34.0 ± 5.9 | Stable Psychotropic drugs | No | Bilateral DLPFC | Right 1 Hz; Left 10 Hz | Right: 100%, Left: 110% | Right: 420 (10), Left: 750 (10) | 11,700 | 2 weeks |
| Sham (rotation 45°) | Mixed | DSM-IV | No | 25/22 | 9/16 | 43.7 ± 10.2 | MADRS | 34.1 ± 5.2 | Stable Psychotropic drugs | No |  |  |  |  |  |  |
| Fitzgerald et al., 2012, Australia[30] | rTMS | MDD | DSM-IV | Yes | 24/24 | 9/15 | 43.4 ± 12.7 | HAMD-17 | 23.7 ± 3.8 | Stable Psychotropic drugs | No | Left DLPFC | 10 Hz | 120% | 1,500 (15) | 22,500 | 3 weeks |
| rTMS | MDD | DSM-IV | Yes | 22/19 | 8/14 | 40.5 ± 15.5 | HAMD-17 | 24.3 ± 3.6 | Stable Psychotropic drugs | No | Bilateral DLPFC | Right 1 Hz; Left 10 Hz | 120% | Right: 900 (15), Left: 1,500 (15) | 36,000 | 3 weeks |
| Sham (rotation 45°) | MDD | DSM-IV | Yes | 20/17 | 12/8 | 44.9 ± 15.7 | HAMD-17 | 22.8 ± 2.1 | Stable Psychotropic drugs | No |  |  |  |  |  |  |
| Fitzgerald et al., 2016, Australia[31] | rTMS | BD | ICD-10 | No | 23/23 | 10/13 | 43.6 ± 12.6 | HAMD-17 | 23.2 ± 4.0 | Stable Psychotropic drugs | No | Bilateral DLPFC | Right 1 Hz; Left 10 Hz | 110% | Right: 1,000 (20), Left: 1,000 (20) | 40,000 | 4 weeks |
| Sham (rotation 45°) | BD | ICD-10 | No | 23/23 | 10/13 | 49.7 ± 11.0 | HAMD-17 | 23.0 ± 5.1 | Stable Psychotropic drugs | No |  |  |  |  |  |  |
| Frick et al., 2021, Sweden[32] | iTBS | BD | DSM-V | No | 19/19 | 9/10 | 30.1 ± 10.3 | MADRS-S | 30.2 ± 8.6 | Stable Psychotropic drugs | No | DMPFC | 50 Hz bursts at 5 Hz | 90% | 1,200 (20–30) | 24,000–36,000 | 10–15 days |
| Matched sham coil | BD | DSM-V | No | 21/21 | 10/11 | 28.7 ± 8.8 | MADRS-S | 30.2 ± 8.0 | Stable Psychotropic drugs | No |  |  |  |  |  |  |
| García-Toro et al., 2001, Spain[33] | rTMS | MDD | DSM-IV | No | 11/11 | 5/6 | 43.2 ± 13.1 | HAMD-21 | 25.9 ± 6.4 | Sertraline, benzodiazepine | Yes | Left DLPFC | 20 Hz | 90% | 1,200 (10) | 12,000 | 2 weeks |
| Sham (rotation 90°) | MDD | DSM-IV | No | 11/11 | 5/6 | 45.0 ± 18.3 | HAMD-21 | 26.6 ± 6.4 | Sertraline, benzodiazepine | Yes |  |  |  |  |  |  |
| García-Toro et al., 2001, Spain[34] | rTMS | MDD | DSM-IV | Yes | 17/17 | 10/7 | 51.5 ± 15.9 | HAMD-21 | 27.1 ± 6.7 | Stable Psychotropic drugs | No | Left DLPFC | 20 Hz | 90% | 1,800 (10) | 18,000 | 2 weeks |
| Sham (rotation 90°) | MDD | DSM-IV | Yes | 18/18 | 10/8 | 50.0 ± 11.0 | HAMD-21 | 25.6 ± 4.9 | Stable Psychotropic drugs | No |  |  |  |  |  |  |
| Garcia-Toro et al., 2006, Spain[35] | rTMS | MDD | DSM-IV | Yes | 10/10 | 6/4 | 48.5 ± 13.3 | HAMD-21 | 27.3 ± 5.0 | Stable Psychotropic drugs | No | Bilateral DLPFC | Right 1 Hz; Left 20 Hz | 110% | Right: 1,500 (10), Left: 1,500 (10) | 30,000 | 2 weeks |
| Sham (rotation 45°) | MDD | DSM-IV | Yes | 10/10 | 3/7 | 47.2 ± 11.8 | HAMD-21 | 25.1 ± 7.3 | Stable Psychotropic drugs | No |  |  |  |  |  |  |
| George et al., 1997, USA[36] | rTMS | Mixed | DSM-IV | No | 6/6 | 4/2 | 42.4 ± 15.5 | HAMD-21 | 30.0 ± 4.0 | Drug-free | Yes | Left DLPFC | 20 Hz | 80% | 800 (10) | 8,000 | 2 weeks |
| Matched sham coil | Mixed | DSM-IV | No | 6/6 | 4/2 | 41.0 ± 8.3 | HAMD-21 | 26.0 ± 3.0 | Drug-free | Yes |  |  |  |  |  |  |
| George et al., 2000, USA[37] | rTMS | Mixed | DSM-IV | No | 10/10 | 4/6 | 43.0 ± 11.0 | HAMD-21 | 28.1 ± 6.0 | Benzodiazepine, mood stabilizers | Yes | Left DLPFC | 5 Hz | 100% | 1,600 (10) | 16,000 | 2 weeks |
| rTMS | Mixed | DSM-IV | No | 10/10 | 3/7 | 41.4 ± 11.0 | HAMD-21 | 26.3 ± 5.9 | Benzodiazepine, mood stabilizers | Yes | Left DLPFC | 20 Hz | 100% | 1,600 (10) | 16,000 | 2 weeks |
| Sham (rotation 45°) | Mixed | DSM-IV | No | 10/10 | 4/6 | 48.5 ± 8.0 | HAMD-21 | 23.8 ± 4.1 | Benzodiazepine, mood stabilizers | Yes |  |  |  |  |  |  |
| George et al., 2010, USA[38] | rTMS | MDD | DSM-IV | Yes | 92/83 | 34/58 | 47.7 ± 10.6 | HAMD-24 | 26.3 ± 5.0 | Benzodiazepine, zolpidem | Yes | Left DLPFC | 10 Hz | 120% | 3,000 (15–30) | 45,000–90,000 | 3–6 weeks |
| Matched sham coil | MDD | DSM-IV | Yes | 98/91 | 48/50 | 46.5 ± 12.3 | HAMD-24 | 26.5 ± 4.8 | Benzodiazepine, zolpidem | Yes |  |  |  |  |  |  |
| Hernández-Ribas et al., 2012, Spain[39] | rTMS | MDD | DSM-IV | No | 10/10 | 2/8 | 42.6 ± 5.6 | HAMD-17 | 19.7 ± 3.8 | Stable Psychotropic drugs | No | Left DLPFC | 15 Hz | 100% | 1,500 (15) | 22,500 | 3 weeks |
| Matched sham coil | MDD | DSM-IV | No | 11/11 | 3/8 | 50.1 ± 8.1 | HAMD-17 | 16.6 ± 2.4 | Stable Psychotropic drugs | No |  |  |  |  |  |  |
| Herwig et al., 2003, Germany[40] | rTMS | MDD | 1CD-10, DSM-IV | No | 13/13 | 5/8 | 41.6 ± 10.5 | HAMD-21 | NA | Stable Psychotropic drugs | No | DLPFC | 15 Hz | 110% | 3,000 (10) | 30,000 | 2 weeks |
| Matched sham coil | MDD | ICD-10, DSM-IV | No | 12/12 | 7/5 | 47.8 ± 10.0 | HAMD-21 | NA | Stable Psychotropic drugs | No |  |  |  |  |  |  |
| Herwig et al., 2007, Germany[41] | rTMS | Mixed | ICD-10, DSM-IV | No | 62/52 | 18/44 | 50.0 ± 15.0 | HAMD-21 | 24.7 ± 5.4 | Venlafaxine / Mirtazapine monotherapy | No | Left DLPFC | 10 Hz | 110% | 2,000 (15) | 30,000 | 3 weeks |
| Sham (rotation 45°) | Mixed | ICD-10, DSM-IV | No | 65/53 | 33/32 | 49.0 ± 13.0 | HAMD-21 | 22.8 ± 4.8 | Venlafaxine / Mirtazapine monotherapy | No |  |  |  |  |  |  |
| Holtzheimer et al., 2004, USA[42] | rTMS | MDD | DSM-IV | Yes | 7/7 | 3/4 | 40.4 ± 8.5 | HAMD-17 | 22.7 ± 5.3 | Drug-free | Yes | Left DLPFC | 10 Hz | 110% | 1,600 (10) | 16,000 | 2 weeks |
| Sham (rotation 45°) | MDD | DSM-IV | Yes | 8/8 | 5/3 | 45.4 ± 4.9 | HAMD-17 | 20.8 ± 6.3 | Drug-free | Yes |  |  |  |  |  |  |
| Höppner et al., 2003, Germany[43] | rTMS | MDD | DSM-IV | No | 10/9 | 1/8 | 57.2 ± 12.2 | HAMD-21 | 21.5 ± 4.0 | Stable Psychotropic drugs | No | Left DLPFC | 20 Hz | 90% | 800 (10) | 8,000 | 2 weeks |
| rTMS | MDD | DSM-IV | No | 10/10 | 3/7 | 56.0 ± 10.7 | HAMD-21 | 22.0 ± 5.0 | Stable Psychotropic drugs | No | Right DLPFC | 1 Hz | 110% | 120 (10) | 1,200 | 2 weeks |
| Sham (rotation 90°) | MDD | DSM-IV | No | 10/10 | 4/6 | 56.0 ± 10.5 | HAMD-21 | 24.5 ± 5.5 | Stable Psychotropic drugs | No |  |  |  |  |  |  |
| Hu et al., 2016, China[44] | rTMS | BD | DSM-IV | No | 11/11 | 5/6 | 27.4 ± 14.3 | HAMD-17 | NA | Quetiapine | Yes | Left DLPFC | 10 Hz | 80% | 1,200 (20) | 24,000 | 4 weeks |
| rTMS | BD | DSM-IV | No | 12/11 | 7/5 | 28.3 ± 10.3 | HAMD-17 | NA | Quetiapine | Yes | Right DLPFC | 1 Hz | 80% | 1,200 (20) | 24,000 | 4 weeks |
| Matched sham coil | BD | DSM-IV | No | 13/12 | 5/7 | 23.7 ± 9.8 | HAMD-17 | NA | Quetiapine | Yes |  |  |  |  |  |  |
| Huang et al., 2012, China[45] | rTMS | MDD | DSM-IV | No | 30/28 | 9/19 | 32.8 ± 7.3 | HAMD-17 | 22.7 ± 2.3 | Citalopram | No | Left DLPFC | 10 Hz | 90% | 800 (10) | 8,000 | 2 weeks |
| Sham (rotation 90°) | MDD | DSM-IV | No | 30/28 | 8/20 | 31.4 ± 7.4 | HAMD-17 | 22.5 ± 2.7 | Citalopram | No |  |  |  |  |  |  |
| Januel et al., 2006, France[46] | rTMS | MDD | DSM-IV | No | 11/11 | 2/9 | 38.6 ± 11.2 | HAMD-17 | 21.7 ± 3.5 | Oxazepam/zopiclone | Yes | Right DLPFC | 1 Hz | 90% | 120 (16) | 1,920 | 4 weeks |
| Matched sham coil | MDD | DSM-IV | No | 16/16 | 4/12 | 37.2 ± 11.7 | HAMD-17 | 22.5 ± 2.7 | Oxazepam/zopiclone | Yes |  |  |  |  |  |  |
| Kauffmann et al., 2004, USA[47] | rTMS | MDD | DSM-IV | Yes | 7/7 | 1/11 | 51.7 ± 17.2 | HAMD-21 | 21.9 ± 2.3 | Stable Psychotropic drugs | No | Right PFC | 1 Hz | 110% | 120 (10) | 1,200 | 2 weeks |
| Sham (rotation 45°) | MDD | DSM-IV | Yes | 5/5 | HAMD-21 | 18.2 ± 2.2 | Stable Psychotropic drugs | No |  |  |  |  |  |  |
| Kazemi et al., 2022, Iran[48] | rTMS | MDD | DSM-V | Yes | 25/25 | 10/15 | 32.0 ± 12.0 | HAMD-17 | 28.3 ± 7.4 | Stable antidepressants | No | Left DLPFC | 10 Hz | 100% | 3,750 (20) | 75,000 | 4 weeks |
| rTMS | MDD | DSM-V | Yes | 25/25 | 9/16 | 34.0 ± 11.0 | HAMD-17 | 32.8 ± 8.1 | Stable antidepressants | No | Bilateral DLPFC | Right 1 Hz; Left 10 Hz | 110% | 5,250 (20) | 105,000 | 4 weeks |
| Sham (rotation 90°) | MDD | DSM-V | Yes | 11/11 | 6/5 | 38.0 ± 11.0 | HAMD-17 | 26.2 ± 6.8 | Stable antidepressants | No |  |  |  |  |  |  |
| Koerselman et al., 2004, Netherlands[49] | rTMS | MDD | DSM-IV | No | 26/26 | 14/12 | 51.0 ± 15.4 | HAMD-17 | 25.9 ± 4.3 | Stable Psychotropic drugs | No | Left DLPFC | 20 Hz | 80% | 800 (10) | 8,000 | 2 weeks |
| Sham (rotation 45°) | MDD | DSM-IV | No | 26/26 | 9/17 | 52.0 ± 13.2 | HAMD-17 | 25.9 ± 5.6 | Stable Psychotropic drugs | No |  |  |  |  |  |  |
| Kreuzer et al., 2015, Germany[50] | rTMS | Mixed | DSM-IV | No | 15/15 | 7/8 | 46.1 ± 9.5 | HAMD-21 | 22.3 ± 4.7 | Stable Psychotropic drugs | No | Left DLPFC | 10 Hz | 110% | 2,000 (15) | 30,000 | 3 weeks |
| Matched sham coil | Mixed | DSM-IV | No | 12/12 | 4/8 | 43.8 ± 10.5 | HAMD-21 | 23.2 ± 4.7 | Stable Psychotropic drugs | No |  |  |  |  |  |  |
| Krstić et al., 2014, Serbia[51] | rTMS | MDD | DSM-V | Yes | 11/11 | 0/11 | 50.7 ± 7.3 | HAMD-24 | 30.1 ± 3.5 | Stable Psychotropic drugs | No | Right DLPFC | 1 Hz | 110% | 300 (10) | 3,000 | 2 weeks |
| Matched sham coil | MDD | DSM-V | Yes | 8/8 | 0/8 | 46.1 ± 8.5 | HAMD-24 | 28.0 ± 2.7 | Stable Psychotropic drugs | No |  |  |  |  |  |  |
| Levkovitz et al., 2015, Israel, USA, Germany, Canada[52] | Deep TMS | MDD | DSM-IV | Yes | 111/89 | 47/42 | 45.1 ± 11.7 | HAMD-21 | 23.5 ± 4.3 | Benzodiazepine | Yes | Left DLPFC | 18 Hz | 120% | 1,980 (20) | 39,600 | 4 weeks |
| Matched sham coil | MDD | DSM-IV | Yes | 122/92 | 48/44 | 47.6 ± 11.6 | HAMD-21 | 23.4 ± 3.7 | Benzodiazepine | Yes |  |  |  |  |  |  |
| Li et al., 2014, China[53] | Continuous TBS | MDD | DSM-IV | Yes | 15/15 | 5/10 | 49.2 | HAMD-17 | 24.3 ± 5.5 | Stable Psychotropic drugs | No | Left DLPFC | 50 Hz bursts at 5 Hz | 80% | 1,800 (10) | 18,000 | 2 weeks |
| iTBS | MDD | DSM-IV | Yes | 15/15 | 7/8 | 42.4 | HAMD-17 | 23.1 ± 3.9 | Stable Psychotropic drugs | No | Left DLPFC | 50 Hz bursts at 5 Hz | 80% | 1,800 (10) | 18,000 | 2 weeks |
| iTBS + cTBS | MDD | DSM-IV | Yes | 15/15 | 4/11 | 42.5 | HAMD-17 | 25.4 ± 5.1 | Stable Psychotropic drugs | No | Bilateral DLPFC | 50 Hz bursts at 5 Hz | 80% | 3,600 (10) | 36,000 | 2 weeks |
| Sham (rotation 90°) | MDD | DSM-IV | Yes | 15/15 | 4/11 | 46.9 | HAMD-17 | 23.8 ± 3.2 | Stable Psychotropic drugs | No |  |  |  |  |  |  |
| Li et al., 2021, China[54] | rTMS | MDD | DSM-IV | Yes | 35/35 | 24/11 | 47.1 ± 13.8 | HAMD-17 | 22.9 ± 3.8 | Sleep aid medication | Yes | Left DLPFC | 10 Hz | 100% | 3,000 (10) | 30,000 | 2 weeks |
| Prolonged iTBS | MDD | DSM-IV | Yes | 35/35 | 23/12 | 47.1 ± 14.2 | HAMD-17 | 22.5 ± 3.5 | Sleep aid medication | Yes | Left DLPFC | 50 Hz bursts at 5 Hz | 80% | 1,800 (10) | 18,000 | 2 weeks |
| Matched sham coil | MDD | DSM-IV | Yes | 35/35 | 24/11 | 47.1 ± 12.4 | HAMD-17 | 23.1 ± 3.5 | Sleep aid medication | Yes |  |  |  |  |  |  |
| Li et al., 2023, China[55] | rTMS | MDD | DSM-V | No | 35/35 | 15/20 | 40.1 ± 12.9 | HAMD-24 | 23.0 ± 5.0 | Drug-free | Yes | Left DLPFC | 10 Hz | 110% | 1,600 (20) | 32,000 | 4 weeks |
| Matched sham coil | MDD | DSM-V | No | 31/31 | 17/14 | 38.1 ± 11.3 | HAMD-24 | 24.4 ± 6.7 | Drug-free | Yes |  |  |  |  |  |  |
| Li et al., 2023, China[56] | rTMS | MDD | DSM-IV | No | 24/24 | 8/16 | 37.8 ± 2.7 | HAMD-17 | 25.6 ± 1.3 | Drug-free | Yes | Left DLPFC | 10 Hz | 120% | 6,000 (20) | 120,000 | 2 weeks |
| Prolonged iTBS | MDD | DSM-IV | No | 24/24 | 8/16 | 37.0 ± 3.1 | HAMD-17 | 24.5 ± 1.0 | Drug-free | Yes | Left DLPFC | 50 Hz bursts at 5 Hz | 80% | 3,600 (20) | 72,000 | 2 weeks |
| Matched sham coil | MDD | DSM-IV | No | 24/24 | 9/15 | 37.0 ± 2.7 | HAMD-17 | 24.1 ± 1.2 | Drug-free | Yes |  |  |  |  |  |  |
| Li et al., 2024, China[57] | rTMS | MDD | DSM-IV | No | 60/53 | 24/36 | 30.4 ± 12.3 | HAMD-24 | 26.3 ± 4.6 | Stable Psychotropic drugs | No | Left DLPFC | 10 Hz | 100% | 1,600 (10) | 16,000 | 2 weeks |
| Matched sham coil | MDD | DSM-IV | No | 60/52 | 23/37 | 32.0 ± 15.4 | HAMD-24 | 26.1 ± 5.5 | Stable Psychotropic drugs | No |  |  |  |  |  |  |
| Lingeswaran, 2011, India[58] | rTMS | MDD | DSM-IV | No | 9/9 | 3/6 | 34.0 ± 10.5 | HAMD-17 | 22.8 ± 3.7 | Stable Psychotropic drugs | No | Left DLPFC | 10 Hz | 100% | 500 (12) | 6,000 | 2 weeks |
| Sham (rotation 90°) | MDD | DSM-IV | No | 14/14 | 6/8 | 37.2 ± 11.8 | HAMD-17 | 22.0 ± 3.1 | Stable Psychotropic drugs | No |  |  |  |  |  |  |
| Loo et al., 2003, Australia[59] | rTMS | MDD | DSM-IV | Yes | 9/9 | 3/6 | 54.9 ± 18.0 | HAMD | 25.0 ± 3.5 | Stable Psychotropic drugs | No | Bilateral DLPFC | 15 Hz | 90% | 1,800 (15) | 27,000 | 3 weeks |
| Matched sham coil | MDD | DSM-IV | Yes | 10/10 | 4/6 | 48.4 ± 10.9 | HAMD | 26.0 ± 3.5 | Stable Psychotropic drugs | No |  |  |  |  |  |  |
| Loo et al., 2007, Australia[60] | rTMS | MDD | DSM-IV | Yes | 19/18 | 9/10 | 49.8 ± 2.5 | HAMD-17 | 19.2 ± 3.7 | Stable Psychotropic drugs | No | Left DLPFC | 10 Hz | 110% | 1,500 (20) | 30,000 | 2 weeks |
| Matched sham coil | MDD | DSM-IV | Yes | 19/18 | 11/8 | 45.7 ± 15.0 | HAMD-17 | 20.9 ± 4.2 | Stable Psychotropic drugs | No |  |  |  |  |  |  |
| Mak et al., 2021, China[61] | rTMS | BD | DSM-V | No | 26/23 | 8/18 | 40.7 ± 11.4 | MADRS | 27.5 ± 5.2 | Stable Psychotropic drugs | No | Right DLPFC | 1 Hz | 110% | 300 (15) | 4,500 | 3 weeks |
| Matched sham coil | BD | DSM-V | No | 28/26 | 10/18 | 39.4 ± 11.3 | MADRS | 27.0 ± 5.1 | Stable Psychotropic drugs | No |  |  |  |  |  |  |
| Mallik et al., 2022, India[62] | Continuous TBS | BD | ICD-10 | No | 11/11 | 5/6 | 43.8 ± 13.0 | HAMD-17 | 27.6 ± 9.1 | Stable Psychotropic drugs | No | Right DLPFC | 50 Hz bursts at 5 Hz | 80% | 600 (15) | 9,000 | 1 week |
| Matched sham coil | BD | ICD-10 | No | 8/8 | 5/3 | 43.6 ± 10.6 | HAMD-17 | 26.3 ± 9.2 | Stable Psychotropic drugs | No |  |  |  |  |  |  |
| Martinot et al., 2010, France[63] | rTMS | Mixed | DSM-IV | Yes | 19/18 | NA | 48.2 ± 7.8 | HAMD-21 | 26.0 ± 6.4 | Stable Psychotropic drugs | No | Left DLPFC | 10 Hz | 90% | 1,600 (10) | 16,000 | 2 weeks |
| Sham (rotation 90°) | Mixed | DSM-IV | Yes | 14/14 | NA | 46.6 ± 10.3 | HAMD-21 | 25.9 ± 6.7 | Stable Psychotropic drugs | No |  |  |  |  |  |  |
| Matsuda et al., 2020, Japan[64] | Deep TMS | Mixed | DSM-IV | Yes | 20/18 | 18/2 | 43.4 ± 5.5 | HAMD-21 | 19.4 ± 8.2 | Stable Psychotropic drugs | No | Left DLPFC | 18 Hz | 120% | 1,980 (20–30) | 39,600–59,400 | 4–6 weeks |
| Matched sham coil | Mixed | DSM-IV | Yes | 20/20 | 19/1 | 45.2 ± 7.0 | HAMD-21 | 20.5 ± 4.1 | Stable Psychotropic drugs | No |  |  |  |  |  |  |
| McDonald et al., 2006, USA[65] | rTMS | Mixed | DSM-IV | Yes | 50/50 | 23/27 | 49.0 | HAMD-17 | 27.0 ± 3.2 | Stable Psychotropic drugs | No | Bilateral DLPFC | Right 1 Hz; Left 10 Hz | 110% | 1,600 (10) | 16,000 | 2 weeks |
| Sham (rotation 90°) | Mixed | DSM-IV | Yes | 12/12 | 7/5 | 54.0 | HAMD-17 | 27.0 ± 2.0 | Stable Psychotropic drugs | No |  |  |  |  |  |  |
| McGirr et al., 2021, Canada[66] | iTBS | BD | DSM-V | No | 18/15 | 7/11 | 44.8 ± 13.7 | MADRS | 32.3 ± 4.0 | Stable Psychotropic drugs | No | Left DLPFC | 50 Hz bursts at 5 Hz | 120% | 600 (20) | 12,000 | 4 weeks |
| Matched sham coil | BD | DSM-V | No | 19/16 | 7/12 | 43.0 ± 14.3 | MADRS | 31.5 ± 5.2 | Stable Psychotropic drugs | No |  |  |  |  |  |  |
| Mogg et al., 2008, UK[67] | rTMS | BD | DSM-IV | Yes | 29/28 | 13/16 | 55.0 ± 18.0 | HAMD-17 | 20.5 ± 4.4 | Stable Psychotropic drugs | No | Left DLPFC | 10 Hz | 110% | 1,000 (10) | 10,000 | 2 weeks |
| Matched sham coil | BD | DSM-IV | Yes | 30/29 | 9/21 | 52.0 ± 15.5 | HAMD-17 | 21.6 ± 4.7 | Stable Psychotropic drugs | No |  |  |  |  |  |  |
| Murgaš et al., 2023, Slovakia[68] | TBS | MDD | DSM-IV | Yes | 8/8 | 3/5 | 35.9 ± 8.4 | HAMD-17 | 18.5 ± 3.6 | Stable Psychotropic drugs | No | Bilateral DLPFC | 50 Hz bursts at 5 Hz | 120% | 1,200 (15) | 18,000 | 3 weeks |
| Sham (rotation 90°) | MDD | DSM-IV | Yes | 3/3 | 0/3 | 40.3 ± 6.0 | HAMD-17 | 22.0 ± 2.7 | Stable Psychotropic drugs | No |  |  |  |  |  |  |
| Nahas et al., 2003, USA[69] | rTMS | BD | DSM-IV | No | 11/11 | 4/7 | 42.4 ± 7.3 | HAMD-28 | 32.5 ± 4.3 | Stable Psychotropic drugs | No | Left DLPFC | 5 Hz | 110% | 1,600 (10) | 16,000 | 2 weeks |
| Sham (rotation 45°) | BD | DSM-IV | No | 12/12 | 5/7 | 43.4 ± 9.3 | HAMD-28 | 32.8 ± 7.6 | Stable Psychotropic drugs | No |  |  |  |  |  |  |
| Novák et al., 2024, Czech Republic[70] | rTMS | BD | DSM-IV | No | 20/15 | 8/12 | 48.9 ± 12.8 | MADRS | 26.1 ± 4.2 | Stable Psychotropic drugs | No | Left DLPFC | 10 Hz | 100% | 1,200 (20) | 24,000 | 4 weeks |
| Matched sham coil | BD | DSM-IV | No | 20/15 | 8/12 | 43.9 ± 10.7 | MADRS | 26.9 ± 4.3 | Stable Psychotropic drugs | No |  |  |  |  |  |  |
| O'Reardon et al., 2007, USA[71] | rTMS | MDD | DSM-IV | No | 155/143 | 69/86 | 47.9 ± 11.0 | HAMD-17 | 22.6 ± 3.3 | Lorazepam | Yes | Left DLPFC | 10 Hz | 120% | 3,000 (20–30) | 60,000–90,000 | 4–6 weeks |
| Matched sham coil | MDD | DSM-IV | No | 146/134 | 72/74 | 48.7 ± 10.6 | HAMD-17 | 22.9 ± 3.5 | Lorazepam | Yes |  |  |  |  |  |  |
| Ortega Rumi et al., 2005, Brazil[72] | rTMS | MDD | DSM-IV | No | 22/22 | 3/19 | 39.3 ± 12.8 | HAMD-17 | 29.7 ± 6.4 | Amitriptyline | Yes | Left DLPFC | 5 Hz | 120% | 1,250 (20) | 25,000 | 4 weeks |
| Matched sham coil | MDD | DSM-IV | No | 24/24 | 4/20 | 38.9 ± 8.8 | HAMD-17 | 30.9 ± 5.5 | Amitriptyline | Yes |  |  |  |  |  |  |
| Padberg et al., 2002, Germany[73] | rTMS | MDD | DSM-IV | Yes | 10/10 | 4/6 | 62.1 ± 4.6 | HAMD-21 | 22.9 ± 3.5 | Stable Psychotropic drugs | No | Left DLPFC | 10 Hz | 100% | 1,500 (10) | 15,000 | 2 weeks |
| rTMS | MDD | DSM-IV | Yes | 10/10 | 3/7 | 60.3 ± 4.1 | HAMD-21 | 23.6 ± 1.9 | Stable Psychotropic drugs | No | Left DLPFC | 10 Hz | 90% | 1,500 (10) | 15,000 | 2 weeks |
| Sham (rotation 90°) | MDD | DSM-IV | Yes | 10/10 | 2/8 | 52.7 ± 5.7 | HAMD-21 | 21.9 ± 1.8 | Stable Psychotropic drugs | No |  |  |  |  |  |  |
| Pallanti et al., 2010, Italy[74] | rTMS | MDD | DSM-IV | Yes | 20/20 | 8/12 | 51.2 ± 12.5 | HAMD-17 | 28.0 ± 6.0 | Stable Psychotropic drugs | No | Right DLPFC | 1 Hz | 110% | 420 (15) | 6,000 | 3 weeks |
| rTMS | MDD | DSM-IV | Yes | 20/20 | 9/11 | 47.6 ± 12.3 | HAMD-17 | 28.8 ± 6.0 | Stable Psychotropic drugs | No | Bilateral DLPFC | Right 1 Hz; Left 10 Hz | 100% | 1,420 (15) | 21,300 | 3 weeks |
| Matched sham coil | MDD | DSM-IV | Yes | 20/20 | 8/12 | 47.9 ± 9.1 | HAMD-17 | 29.1 ± 3.5 | Stable Psychotropic drugs | No |  |  |  |  |  |  |
| Pan et al., 2020, China[75] | rTMS | MDD | DSM-IV | No | 21/21 | 2/19 | 18.1 ± 3.9 | HAMD-24 | 38.3 ± 7.9 | Escitalopram | No | Left DLPFC | 10 Hz | 100% | 6,000 (7) | 42,000 | 1 week |
| Sham (rotation 90°) | MDD | DSM-IV | No | 21/21 | 5/16 | 21.4 ± 6.8 | HAMD-24 | 35.8 ± 8.9 | Escitalopram | No |  |  |  |  |  |  |
| Pan et al., 2023, China[76] | rTMS | MDD | DSM-IV | No | 31/31 | 10/21 | 18.0 ± 4.0 | HAMD-24 | 37.3 ± 9.7 | Escitalopram | No | Left DLPFC | 10 Hz | 100% | 6,000 (7) | 42,000 | 1 week |
| Sham (rotation 90°) | MDD | DSM-IV | No | 28/28 | 8/20 | 20.6 ± 5.8 | HAMD-24 | 35.4 ± 8.9 | Escitalopram | No |  |  |  |  |  |  |
| Plewnia et al., 2014, Germany[77] | TBS | MDD | DSM-IV | No | 16/16 | 8/8 | 46.9 ± 13.2 | HAMD | 23.6 ± 5.3 | Stable Psychotropic drugs | No | Bilateral DLPFC | 50 Hz bursts at 5 Hz | 80% | 1,200 (30) | 36,000 | 6 weeks |
| Sham (rotation 45°) | MDD | DSM-IV | No | 16/16 | 4/12 | 49.0 ± 13.6 | HAMD | 22.2 ± 5.9 | Stable Psychotropic drugs | No |  |  |  |  |  |  |
| Prasser et al., 2014, Germany[78] | rTMS | MDD | DSM-IV | No | 17/17 | 8/9 | 50.4 ± 9.9 | HAMD-21 | 25.0 ± 4.4 | Stable Psychotropic drugs | No | Bilateral DLPFC | Right 1 Hz; Left 10 Hz | 110% | 2,000 (15) | 30,000 | 3 weeks |
| TBS | MDD | DSM-IV | No | 20/20 | 10/10 | 48.2 ± 10.9 | HAMD-21 | 27.4 ± 6.5 | Stable Psychotropic drugs | No | Bilateral DLPFC | 50 Hz bursts at 5 Hz | 80% | 2,400 (15) | 36,000 | 3 weeks |
| Matched sham coil | MDD | DSM-IV | No | 17/17 | 9/8 | 42.6 ± 12.4 | HAMD-21 | 25.3 ± 5.4 | Stable Psychotropic drugs | No |  |  |  |  |  |  |
| Pu et al., 2022, China[79] | rTMS | MDD | ICD-10 | No | 50/42 | 19/31 | 38.5 ± 10.1 | HAMD-17 | 22.8 ± 6.4 | Agomelatine | No | Left DLPFC | 10 Hz | 120% | 2,000 (20) | 40,000 | 4 weeks |
| Sham (rotation 90°) | MDD | ICD-10 | No | 50/40 | 22/28 | 36.7 ± 9.6 | HAMD-17 | 21.5 ± 6.6 | Agomelatine | No |  |  |  |  |  |  |
| Ramos et al., 2025, Brazil[80] | Accelerated iTBS | MDD | DSM-V | Yes | 50/45 | 8/42 | 44.5 ± 8.2 | HAMD-17 | 20.6 ± 2.3 | Stable Psychotropic drugs | No | Left DLPFC | 50 Hz bursts at 5 Hz | 100% | 1,200 (45) | 54,000 | 3 weeks |
| Matched sham coil | MDD | DSM-V | Yes | 50/44 | 8/42 | 40.6 ± 9.0 | HAMD-17 | 20.5 ± 2.3 | Stable Psychotropic drugs | No |  |  |  |  |  |  |
| Ray et al., 2011, India[81] | rTMS | MDD | ICD-10 | No | 21/20 | 5/15 | 36.8 ± 12.3 | HAMD | 29.6 ± 3.8 | Stable Psychotropic drugs | No | Left DLPFC | 10 Hz | 90% | 1,200 (10) | 12,000 | 2 weeks |
| Sham (rotation 45°) | MDD | ICD-10 | No | 20/20 | 3/17 | 31.3 ± 9.3 | HAMD | 29.4 ± 5.7 | Stable Psychotropic drugs | No |  |  |  |  |  |  |
| Rossini et al., 2005, Italy[82] | rTMS | MDD | DSM-IV | Yes | 18/18 | 6/12 | 57.4 ± 8.7 | HAMD-21 | 28.8 ± 3.1 | Stable Psychotropic drugs | No | Left DLPFC | 15 Hz | 100% | 600 (10) | 6,000 | 2 weeks |
| rTMS | MDD | DSM-IV | Yes | 19/18 | 4/15 | 54.0 ± 11.2 | HAMD-21 | 28.6 ± 2.7 | Stable Psychotropic drugs | No | Left DLPFC | 15 Hz | 80% | 600 (10) | 6,000 | 2 weeks |
| Sham (rotation 90°) | MDD | DSM-IV | Yes | 17/16 | 6/11 | 56.3 ± 12.6 | HAMD-21 | 28.7 ± 2.1 | Stable Psychotropic drugs | No |  |  |  |  |  |  |
| Rossini et al., 2005, Italy[83] | rTMS | MDD | DSM-IV | No | 50/49 | 11/39 | 48.4 ± 13.7 | HAMD-21 | 25.1 ± 3.5 | Stable SSRI/SNRI | No | Left DLPFC | 15 Hz | 100% | 900 (10) | 9,000 | 2 weeks |
| Sham (rotation 90°) | MDD | DSM-IV | No | 49/47 | 9/40 | 46.4 ± 12.1 | HAMD-21 | 25.1 ± 3.1 | Stable SSRI/SNRI | No |  |  |  |  |  |  |
| Rothärmel et al., 2021, France[84] | rTMS | Mixed | DSM-IV | Yes | 28/26 | 11/17 | 48.4 ± 13.0 | HAMD-21 | 26.2 ± 5.5 | Stable Psychotropic drugs | No | Left DLPFC | 20 Hz | 90% | 800 (5) | 4,000 | 1 week |
| Matched sham coil | Mixed | DSM-IV | Yes | 28/26 | 12/16 | 51.6 ± 15.4 | HAMD-21 | 28.3 ± 4.8 | Stable Psychotropic drugs | No |  |  |  |  |  |  |
| Sheline et al., 2024, USA[85] | Accelerated iTBS | BD | DSM-IV | Yes | 12/12 | 6/6 | 43.1 ± 15.2 | MADRS | 30.4 ± 4.8 | Stable Psychotropic drugs | No | Left DLPFC | 50 Hz bursts at 5 Hz | 90% | 1,800 (50) | 90,000 | 10 days |
| Matched sham coil | BD | DSM-IV | Yes | 12/12 | 6/6 | 43.6 ± 19.2 | MADRS | 28.0 ± 5.4 | Stable Psychotropic drugs | No |  |  |  |  |  |  |
| Speer et al., 2014, USA[86] | rTMS | Mixed | DSM-IV | No | 16/16 | 6/10 | 40.4 ± 11.7 | HAMD-28 | 32.2 ± 9.7 | Drug-free | Yes | Left DLPFC | 1 Hz or 20 Hz | 110% | 1,600 (15) | 24,000 | 3 weeks |
| Sham (rotation 45°) | Mixed | DSM-IV | No | 8/8 | 5/3 | 44.9 ± 9.1 | HAMD-28 | 24.0 ± 4.6 | Drug-free | Yes |  |  |  |  |  |  |
| Stern et al., 2007, USA[87] | rTMS | MDD | DSM-IV | Yes | 10/10 | 4/6 | 53.2 ± 12.0 | HAMD-21 | 27.8 ± 3.2 | Drug-free | Yes | Left DLPFC | 10 Hz | 110% | 1,600 (10) | 16,000 | 2 weeks |
| rTMS | MDD | DSM-IV | Yes | 10/8 | 4/6 | 52.4 ± 9.4 | HAMD-21 | 27.6 ± 3.9 | Drug-free | Yes | Left DLPFC | 1 Hz | 110% | 1,600 (10) | 16,000 | 2 weeks |
| rTMS | MDD | DSM-IV | Yes | 10/10 | 3/7 | 52.8 ± 9.5 | HAMD-21 | 27.9 ± 3.8 | Drug-free | Yes | Right DLPFC | 1 Hz | 110% | 1,600 (10) | 16,000 | 2 weeks |
| Sham (rotation 90°) | MDD | DSM-IV | Yes | 15/14 | 6/9 | 53.3 ± 9.0 | HAMD-21 | 27.4 ± 2.9 | Drug-free | Yes |  |  |  |  |  |  |
| Struckmann et al., 2020, Sweden[88] | iTBS | Mixed | DSM-IV | Yes | 18/18 | 8/10 | 30.0 ± 11.0 | MADRS | 30.0 ± 9.0 | Stable Psychotropic drugs | No | DMPFC | 50 Hz bursts at 5 Hz | 90% | 1,200 (20–30) | 24,000–36,000 | 10–15 days |
| Matched sham coil | Mixed | DSM-IV | Yes | 21/21 | 10/11 | 29.0 ± 9.0 | MADRS | 30.0 ± 8.0 | Stable Psychotropic drugs | No |  |  |  |  |  |  |
| Su et al., 2005, China[89] | rTMS | Mixed | DSM-IV | Yes | 10/10 | 3/7 | 43.6 ± 12.0 | HAMD-21 | 23.2 ± 7.5 | Stable Psychotropic drugs | No | Left DLPFC | 20 Hz | 100% | 1,600 (10) | 16,000 | 2 weeks |
| rTMS | Mixed | DSM-IV | Yes | 10/10 | 2/8 | 43.2 ± 10.6 | HAMD-21 | 26.5 ± 5.2 | Stable Psychotropic drugs | No | Left DLPFC | 5 Hz | 100% | 1,600 (10) | 16,000 | 2 weeks |
| Sham (rotation 90°) | Mixed | DSM-IV | Yes | 10/10 | 3/7 | 42.6 ± 11.0 | HAMD-21 | 22.7 ± 4.7 | Stable Psychotropic drugs | No |  |  |  |  |  |  |
| Tavares et al., 2021, Brazil[90] | TBS | Mixed | DSM-IV | No | 42/28 | 11/31 | 40.8 ± 10.0 | MADRS | 35.4 ± 6.5 | Stable Psychotropic drugs | No | Bilateral DLPFC | 50 Hz bursts at 5 Hz | 90% | 3,600 (21) | 756,000 | 6 weeks |
| Matched sham coil | Mixed | DSM-IV | No | 48/36 | 15/33 | 38.0 ± 10.9 | MADRS | 34.5 ± 5.7 | Stable Psychotropic drugs | No |  |  |  |  |  |  |
| Theleritis et al., 2017, Greece[91] | rTMS | MDD | DSM-IV | Yes | 27/25 | 11/16 | 39.1 ± 10.1 | HAMD-17 | 30.6 ± 3.2 | Stable Psychotropic drugs | No | Left DLPFC | 20 Hz | 100% | 1,600 (15) | 24,000 | 3 weeks |
| Sham (rotation 90°) | MDD | DSM-IV | Yes | 20/18 | 10/10 | 38.0 ± 9.9 | HAMD-17 | 29.4 ± 3.2 | Stable Psychotropic drugs | No |  |  |  |  |  |  |
| rTMS | MDD | DSM-IV | Yes | 27/25 | 15/12 | 38.9 ± 13.9 | HAMD-17 | 29.7 ± 4.6 | Stable Psychotropic drugs | No | Left DLPFC | 20 Hz | 100% | 1,600 (30) | 48,000 | 3 weeks |
| Sham (rotation 90°) | MDD | DSM-IV | Yes | 24/21 | 14/10 | 39.4 ± 8.9 | HAMD-17 | 30.3 ± 3.6 | Stable Psychotropic drugs | No |  |  |  |  |  |  |
| Tong et al., 2021, China[92] | rTMS | MDD | DSM-V | No | 60/55 | 24/36 | 48.7 ± 14.0 | HAMD-17 | 29.6 ± 3.6 | Escitalopram | No | Left DLPFC | 10 Hz | 120% | 2,000 (20) | 40,000 | 4 weeks |
| Matched sham coil | MDD | DSM-V | No | 60/54 | 29/31 | 47.8 ± 13.4 | HAMD-17 | 28.5 ± 4.0 | Escitalopram | No |  |  |  |  |  |  |
| Triggs et al., 2010, USA[93] | rTMS | MDD | DSM-IV | Yes | 16/16 | 7/9 | 48.5 ± 10.8 | HAMD-24 | 27.2 ± 4.8 | Stable Psychotropic drugs | No | Right DLPFC | 5 Hz | 100% | 2,000 (10) | 20,000 | 2 weeks |
| Matched sham coil | MDD | DSM-IV | Yes | 7/7 | 3/4 | 46.6 ± 20.2 | HAMD-24 | 27.3 ± 2.7 | Stable Psychotropic drugs | No |  |  |  |  |  |  |
| rTMS | MDD | DSM-IV | Yes | 18/18 | 4/14 | 46.7 ± 15.3 | HAMD-24 | 28.2 ± 6.0 | Stable Psychotropic drugs | No | Left DLPFC | 5 Hz | 100% | 2,000 (10) | 20,000 | 2 weeks |
| Matched sham coil | MDD | DSM-IV | Yes | 7/7 | 5/2 | 41.9 ± 14.1 | HAMD-24 | 27.7 ± 3.5 | Stable Psychotropic drugs | No |  |  |  |  |  |  |
| Tsai et al., 2021, China[94] | Prolonged iTBS | MDD | DSM-IV | Yes | 19/19 | 5/14 | 48.7 ± 14.4 | HAMD-17 | 22.5 ± 3.2 | Stable Psychotropic drugs | No | Left DLPFC | 50 Hz bursts at 5 Hz | 80% | 1,800 (10) | 18,000 | 2 weeks |
| rTMS | MDD | DSM-IV | Yes | 20/20 | 6/14 | 49.1 ± 14.8 | HAMD-17 | 22.6 ± 3.3 | Stable Psychotropic drugs | No | Left DLPFC | 10 Hz | 100% | 1,600 (10) | 16,000 | 2 weeks |
| Matched sham coil | MDD | DSM-IV | Yes | 22/22 | 6/16 | 48.5 ± 12.9 | HAMD-17 | 22.6 ± 2.6 | Stable Psychotropic drugs | No |  |  |  |  |  |  |
| Tura et al., 2024, Italy[95] | Accelerated iTBS | MDD | DSM-V | No | 39/39 | 19/20 | 35.8 ± 13.0 | MADRS | 23.2 ± 7.4 | Stable Antidepressants | No | Left DLPFC | 50 Hz bursts at 5 Hz | 110% | 1,800 (20) | 36,000 | 5 days |
| Matched sham coil | MDD | DSM-V | No | 38/38 | 25/13 | 34.9 ± 12.6 | MADRS | 23.9 ± 7.2 | Stable Antidepressants | No |  |  |  |  |  |  |
| Ullrich et al., 2012, Germany[96] | rTMS | MDD | DSM-V | No | 22/22 | 7/15 | 56.9 ± 10.2 | HAMD-21 | 30.4 ± 4.8 | Stable Psychotropic drugs | No | Left DLPFC | 30 Hz | 110% | 1,800 (15) | 27,000 | 3 weeks |
| Low-frequency rTMS as sham | MDD | DSM-V | No | 21/21 | 9/12 | 54.1 ± 7.8 | HAMD-21 | 28.2 ± 3.9 | Stable Psychotropic drugs | No | Left DLPFC | 1 Hz | 110% | 1,800 (15) | 27,000 | 3 weeks |
| Wang et al., 2017, China[97] | rTMS | MDD | DSM-IV | No | 22/19 | 12/10 | 28.8 ± 8.4 | HAMD-24 | 43.5 ± 9.9 | Paroxetine | No | Left DLPFC | 10 Hz | 80% | 800 (20) | 16,000 | 4 weeks |
| Matched sham coil | MDD | DSM-IV | No | 21/19 | 11/10 | 30.1 ± 9.4 | HAMD-24 | 42.8 ± 9.3 | Paroxetine | No |  |  |  |  |  |  |
| Wang et al., 2021, China[98] | rTMS | MDD | DSM-V | No | 33/32 | 13/19 | 24.9 ± 9.5 | HAMD-17 | 16.1 ± 7.2 | Stable Psychotropic drugs | No | Left DLPFC | 10 Hz | 100% | 3,000 (15) | 45,000 | 15 days |
| Matched sham coil | MDD | DSM-V | No | 27/24 | 11/13 | 23.8 ± 8.1 | HAMD-17 | 13.3 ± 5.7 | Stable Psychotropic drugs | No |  |  |  |  |  |  |
| Wilkening et al., 2022, Germany[99] | iTBS | MDD | DSM-IV | No | 40/35 | 21/19 | 35.7 ± 13.0 | MADRS | 23.2 ± 7.6 | Stable Psychotropic drugs | No | Left DLPFC | 50 Hz bursts at 5 Hz | 110% | 1,800 (20) | 36,000 | 5 days |
| Matched sham coil | MDD | DSM-IV | No | 41/35 | 26/15 | MADRS | 23.2 ± 7.6 | Stable Psychotropic drugs | No |  |  |  |  |  |  |
| Yesavage et al., 2018, USA[100] | rTMS | MDD | DSM-IV | Yes | 81/60 | 67/14 | 55.6 ± 12.2 | HAMD-24 | 26.2 ± 4.9 | Stable Psychotropic drugs | No | Left DLPFC | 10 Hz | 120% | 4,000 (20–30) | 80,000–120,000 | 4–6 weeks |
| Matched sham coil | MDD | DSM-IV | Yes | 83/65 | 65/18 | 54.8 ± 12.6 | HAMD-24 | 27.5 ± 5.1 | Stable Psychotropic drugs | No |  |  |  |  |  |  |
| Yildiz et al., 2023, Turkey[101] | rTMS | MDD | DSM-IV | Yes | 15/15 | 2/13 | 40.6 ± 7.2 | HAMD-17 | 22.2 ± 4.9 | Stable Antidepressants | No | Left DLPFC | 10 Hz | 110% | 1,000 (20) | 20,000 | 4 weeks |
| Matched sham coil | MDD | DSM-IV | Yes | 15/15 | 6/9 | 37.7 ± 9.3 | HAMD-17 | 20.2 ± 5.0 | Stable Antidepressants | No |  |  |  |  |  |  |
| Yu et al., 2022, China[102] | rTMS | MDD | DSM-IV | No | 25/23 | 9/14 | 23.6 ± 8.4 | HAMD-17 | 14.7 ± 5.3 | Stable Antidepressants | No | Left DLPFC | 10 Hz | 100% | 3,000 (15) | 45,000 | 15 days |
| Matched sham coil | MDD | DSM-IV | No | 24/21 | 9/12 | 22.1 ± 4.7 | HAMD-17 | 15.0 ± 5.3 | Stable Antidepressants | No |  |  |  |  |  |  |
| Zavorotnyy et al., 2020, Germany[103] | iTBS | MDD | DSM-IV | No | 28/26 | 14/14 | 40.0 ± 12.1 | HAMD-21 | 16.8 ± 5.9 | Stable Psychotropic drugs | No | Left DLPFC | 50 Hz bursts at 5 Hz | 90% | 1,200 (20) | 24,000 | 2 weeks |
| Matched sham coil | MDD | DSM-IV | No | 29/27 | 13/16 | 45.6 ± 12.9 | HAMD-21 | 16.3 ± 4.9 | Stable Psychotropic drugs | No |  |  |  |  |  |  |
| Zengin et al., 2022, Turkey[104] | rTMS | BD | DSM-V | No | 14/14 | 6/8 | 42.4 ± 9.5 | HAMD | 20.4 ± 2.8 | Stable Psychotropic drugs | No | Left DLPFC | 10 Hz | 110% | 1,000 (20) | 20,000 | 4 weeks |
| Sham (rotation 45°) | BD | DSM-V | No | 15/15 | 8/7 | 38.9 ± 10.3 | HAMD | 20.1 ± 2.6 | Stable Psychotropic drugs | No |  |  |  |  |  |  |
| Zhang et al., 2021, China[105] | rTMS | MDD | DSM-IV | No | 27/27 | 10/17 | 31.3 ±12.8 | HAMD-24 | 35.8 ± 7.9 | Sleep aid medication | Yes | Left DLPFC | 10 Hz | 90% | 1,600 (10) | 16,000 | 5 days |
| Sham (rotation 90°) | MDD | DSM-IV | No | 23/23 | 10/13 | 31.6 ± 10.5 | HAMD-24 | 35.7 ± 9.3 | Sleep aid medication | Yes |  |  |  |  |  |  |
| Zheng et al., 2010, China[106] | rTMS | MDD | DSM-IV | Yes | 19/19 | 12/7 | 26.9 ± 6.2 | HAMD-17 | 24.6 ± 3.0 | Escitalopram | No | Left DLPFC | 15 Hz | 110% | 3,000 (20) | 60,000 | 4 weeks |
| Sham (rotation 90°) | MDD | DSM-IV | Yes | 15/15 | 10/5 | 26.7 ± 4.3 | HAMD-17 | 24.6 ± 2.8 | Escitalopram | No |  |  |  |  |  |  |
| Zheng et al., 2015, China[107] | rTMS | MDD | DSM-IV | Yes | 18/18 | 12/6 | 26.9 ± 6.4 | HAMD-17 | 23.1 ± 3.6 | Escitalopram | No | Left DLPFC | 15 Hz | 110% | 3,000 (20) | 20,000 | 4 weeks |
| Sham (rotation 90°) | MDD | DSM-IV | Yes | 14/14 | 9/5 | 26.9 ± 4.3 | HAMD-17 | 23.6 ± 3.6 | Escitalopram | No |  |  |  |  |  |  |
| Zhou et al., 2024, China[108] | rTMS | MDD | DSM-IV | No | 60/55 | 26/34 | 32.0 ± 14.5 | HAMD-24 | 26.0 ± 4.5 | Stable Psychotropic drugs | No | Left DLPFC | 10 Hz | 110% | 1,600 (10) | 16,000 | 2 weeks |
| Matched sham coil | MDD | DSM-IV | No | 60/53 | 29/31 | 32.7 ± 15.5 | HAMD-24 | 25.9 ± 5.4 | Stable Psychotropic drugs | No |  |  |  |  |  |  |

**Table S2**. Quality assessment of the included articles.

| Author, year | Sequence generation | Allocation concealment | Blinding participants and personnel | Blinding of outcome and assessment | Incomplete outcome data | Selective outcome reporting | Overall risk of bias |
| --- | --- | --- | --- | --- | --- | --- | --- |
| Akpinar et al., 2022 | Unclear | Unclear | Unclear | Low | Low | Low | Unclear |
| Anderson et al., 2007 | Unclear | Low | Unclear | Low | Low | Low | Unclear |
| Armas-Castañeda et al., 2021 | Low | Low | Low | Low | Low | Unclear | Low |
| Asgharian & Vaghef, 2022 | Unclear | Low | Unclear | Low | Low | Low | Unclear |
| Avery et al., 2006 | Low | Unclear | Low | Low | Low | Low | Low |
| Bakim et al., 2012 | Low | Unclear | Unclear | Low | Low | Low | Unclear |
| Bengtsson et al., 2023 | Low | Low | Low | Low | Low | Low | Low |
| Bengtsson et al., 2023 | Low | Low | Low | Low | Low | Low | Low |
| Berman et al., 2000 | Unclear | Unclear | Low | Low | High | Low | High |
| Blumberger et al., 2012 | Low | Low | Low | Low | Low | Low | Low |
| Boutros et al., 2002 | Low | Unclear | Low | Low | Low | Low | Low |
| Bretlau et al., 2008 | Unclear | Unclear | Unclear | Unclear | Low | Low | Unclear |
| Buchholtz Hansen et al., 2004 | Unclear | Low | Unclear | Low | Low | Low | Unclear |
| Carpenter et al., 2017 | Low | Low | Low | Low | Low | Low | Low |
| Chen et al., 2013 | Low | Unclear | Low | Low | Unclear | Low | Unclear |
| Cheng et al., 2022 | Low | Low | Low | Low | Low | Low | Low |
| Cheng et al., 2022 | Low | Low | Low | Low | Low | Low | Low |
| Chistyakov et al., 2015 | Unclear | Unclear | Low | Low | Low | Low | Unclear |
| Chou et al., 2020 | Unclear | Unclear | Low | Low | Low | Low | Low |
| Chou et al., 2023 | Low | Low | Unclear | Low | Low | Low | Low |
| Cole et al., 2022 | Low | Low | Low | Low | Low | Low | Low |
| Concerto et al., 2015 | Unclear | Unclear | Unclear | Unclear | Low | Low | Unclear |
| Dai et al., 2021 | Low | Unclear | Low | Low | Low | Low | Low |
| Dellink et al., 2024 | Unclear | Unclear | Low | Low | Low | Low | Low |
| Dunlop et al., 2020 | Unclear | Unclear | Low | Low | Low | Low | Low |
| Duprat et al., 2016 | Unclear | Unclear | Unclear | Low | Low | Low | Unclear |
| Eschweiler et al., 2000 | Unclear | Unclear | Low | Low | Low | Low | Unclear |
| Fitzgerald et al., 2003 | Unclear | Low | Low | Low | Low | Low | Unclear |
| Fitzgerald et al., 2006 | Low | Low | Low | Low | Low | Low | Low |
| Fitzgerald et al., 2012 | Low | Low | Low | Low | Low | Low | Low |
| Fitzgerald et al., 2016 | Low | Unclear | Low | Low | Low | Low | Low |
| Frick et al., 2021 | Low | Low | Low | Low | Low | Low | Low |
| García-Toro et al., 2001 | Unclear | Unclear | Unclear | Low | Unclear | Low | Unclear |
| García-Toro et al., 2001 | Unclear | High | Unclear | Low | Unclear | Low | High |  |  |  |  |
| Garcia-Toro et al., 2006 | Unclear | High | Unclear | Low | Low | Low | High |
| George et al., 1997 | Unclear | Unclear | Unclear | Low | Low | Unclear | Unclear |
| George et al., 2000 | Unclear | Unclear | Low | Low | Low | Low | Unclear |
| George et al., 2010 | Low | Unclear | Low | Low | Low | Low | Low |
| Hernández-Ribas et al., 2012 | Unclear | Unclear | Unclear | Low | Unclear | Low | Unclear |
| Herwig et al., 2003 | Unclear | Unclear | Unclear | Low | Unclear | Low | Unclear |
| Herwig et al., 2007 | Low | Unclear | Unclear | Low | Low | Low | Unclear |
| Holtzheimer et al., 2004 | Unclear | Unclear | Unclear | Low | Low | Low | Unclear |
| Höppner et al., 2003 | Low | Unclear | Unclear | Unclear | Unclear | Low | Unclear |
| Hu et al., 2016 | Unclear | Unclear | Unclear | Unclear | Low | Low | Unclear |
| Huang et al., 2012 | Low | Unclear | Unclear | Low | Low | Low | Unclear |
| Januel et al., 2006 | Low | Unclear | Unclear | Low | High | Low | High |
| Kauffmann et al., 2004 | Unclear | Unclear | Unclear | Low | Low | Low | Unclear |
| Kazemi et al., 2022 | Low | Unclear | Low | Low | Low | Low | Low |
| Koerselman et al., 2004 | Unclear | Unclear | Low | Low | Low | Low | Unclear |
| Kreuzer et al., 2015 | Low | Unclear | Low | Low | High | Low | High |
| Krstić et al., 2014 | Unclear | Unclear | Unclear | Low | Low | Low | Unclear |
| Levkovitz et al., 2015 | Low | Low | Low | Low | Low | Low | Low |
| Li et al., 2014 | Unclear | Unclear | Unclear | Low | Low | Low | Unclear |
| Li et al., 2021 | Low | Low | Low | Low | Low | Low | Low |
| Li et al., 2023 | Low | Low | Low | Low | Low | Low | Low |
| Li et al., 2023 | Low | Low | Low | Low | Low | Low | Low |
| Li et al., 2024 | Low | Low | Low | Low | Low | Low | Low |
| Lingeswaran, 2011 | Low | Unclear | Low | Low | Unclear | Low | Unclear |
| Loo et al., 2003 | Unclear | Unclear | Unclear | Low | Low | Low | Unclear |
| Loo et al., 2007 | Low | Unclear | Unclear | Low | Low | Low | Unclear |
| Mak et al., 2021 | Low | Low | Unclear | Low | Low | Low | Low |
| Mallik et al., 2022 | Low | Low | Unclear | Low | Low | Low | Low |
| Martiny et al., 2010 | Low | Low | Low | Low | Low | Unclear | Low |
| Matsuda et al., 2020 | Low | Low | Low | Low | Low | Low | Low |
| McDonald et al., 2006 | Unclear | Unclear | Unclear | Low | Low | Low | Unclear |
| McGirr et al., 2021 | Low | Low | Low | Low | Low | Low | Low |
| Mogg et al., 2008 | Low | Low | Low | Low | Low | Low | Low |
| Murgaš et al., 2023 | Low | Low | Low | Low | Low | Low | Low |
| Nahas et al., 2003 | Low | Unclear | Low | Low | Low | Low | Low |
| Novák et al., 2024 | Low | Low | Low | Low | Low | Low | Low |
| O'Reardon et al., 2007 | Unclear | Unclear | Low | Low | Low | Low | Unclear |
| Ortega Rumi et al., 2005 | Unclear | Unclear | Unclear | Low | Unclear | Low | Unclear |
| Padberg et al., 2002 | Unclear | Unclear | Unclear | Low | Low | Low | Unclear |
| Pallanti et al., 2010 | Low | Low | Unclear | Low | Low | Low | Unclear |
| Pan et al., 2020 | Low | High | Low | Low | Low | Low | High |
| Pan et al., 2023 | Low | Low | Low | Low | Low | Low | Low |
| Plewnia et al., 2014 | Low | Unclear | Unclear | Low | Unclear | Low | Unclear |
| Prasser et al., 2014 | Low | Unclear | Low | Low | Low | Low | Low |
| Pu et al., 2022 | Unclear | Unclear | Unclear | Low | Unclear | Low | Unclear |
| Ramos et al., 2025 | Low | Unclear | Low | Low | Low | Low | Low |
| Ray et al., 2011 | Low | Unclear | Low | Low | Low | Low | Low |
| Rossini et al., 2005 | Low | Unclear | Low | Low | Low | Low | Low |
| Rossini et al., 2005 | Low | Unclear | Unclear | Low | Low | Low | Unclear |
| Rothärmel et al., 2021 | Low | Low | Low | Low | Low | Low | Low |
| Sheline et al., 2024 | Low | Low | Low | Low | Low | Low | Low |
| Speer et al., 2014 | Unclear | Unclear | Unclear | Low | Low | Low | Unclear |
| Stern et al., 2007 | Unclear | Unclear | Unclear | Low | Low | Low | Unclear |
| Struckmann et al., 2020 | Low | Low | Low | Low | High | Unclear | High |
| Su et al., 2005 | Unclear | Unclear | Unclear | Low | Low | Low | Unclear |
| Tavares et al., 2021 | Low | Low | Low | Low | High | Low | High |
| Theleritis et al., 2017 | Low | Low | Low | Low | Low | Low | Low |
| Tong et al., 2021 | Low | Low | Low | Low | Low | Low | Low |
| Triggs et al., 2010 | Unclear | Unclear | Low | Low | Low | Low | Unclear |
| Tsai et al., 2021 | Unclear | Unclear | Unclear | Low | Low | Low | Unclear |
| Tura et al., 2024 | Low | Low | Unclear | Low | Low | Low | Low |
| Ullrich et al., 2012 | Unclear | Unclear | Low | Low | Low | Low | Unclear |
| Wang et al., 2017 | Low | Low | Low | Low | Low | Low | Low |
| Wang et al., 2021 | Low | Unclear | Low | Low | High | Low | High |
| Wilkening et al., 2022 | Low | Low | Low | Low | Low | Low | Low |
| Yesavage et al., 2018 | Low | Low | Low | Low | Low | Low | Low |
| Yildiz et al., 2023 | Low | Low | Low | Low | Low | Low | Low |
| Yu et al., 2022 | Unclear | Unclear | Low | Low | Low | Low | Low |
| Zavorotnyy et al., 2020 | Unclear | Unclear | Low | Low | Low | Low | Low |
| Zengin et al., 2022 | Low | Low | Low | Low | Low | Low | Low |
| Zhang et al., 2021 | Low | Low | Low | Low | Low | Low | Low |
| Zheng et al., 2010 | Unclear | Unclear | Unclear | Unclear | Unclear | Low | Unclear |
| Zheng et al., 2015 | Unclear | Unclear | Unclear | Low | Low | Low | Unclear |
| Zhou et al., 2024 | Low | Low | Low | Low | Low | Low | Low |

**Table S3**. Dose-response associations of rTMS with total pulses for depressive symptoms, treatment response, and remission.

| Outcome type | Studies (values) | EDmax (95% CI) | Max effect (95% CI) | Overall test (χ², df, p) | Non-linearity test (p) | Adjusted R² |
| --- | --- | --- | --- | --- | --- | --- |
| Symptom score |  |  |  |  |  |  |
| Acute | 105 (126) | 30,835 (16,072–45,597) | SMD 0.73 (0.58–0.88) | 90.42, (2), <0.0001 | 0.001 | 0.413 |
| Follow-up | 30 (35) | 26,404 (6,888–45,921) | SMD 1.07 (0.54–1.60) | 16.01, (2), 0.0003 | 0.080 | 0.300 |
| Response |  |  |  |  |  |  |
| Acute | 87 (100) | 37,043 (30,683–43,403) | RR 2.61 (2.18–3.16) | 108.33, (2), <0.0001 | <0.001 | 0.494 |
| Follow-up | 14 (16) | 32,334 (24,995–39,672) | RR 2.12 (1.32–3.35) | 10.10, (2), 0.006 | 0.016 | 0.130 |
| Remission |  |  |  |  |  |  |
| Acute | 58 (72) | 39,053 (31,994–46,111) | RR 2.77 (2.10–3.67) | 51.40, (2), <0.0001 | <0.001 | 0.366 |
| Follow-up | 11 (11) | 50,375 (11,097–91,847) | RR 1.48 (1.06–2.03) | 6.60, (2), 0.037 | 0.277 | 0.109 |

**Table S4**. Dose-response associations of rTMS with pulses per session for depressive symptoms, treatment response, and remission.

| Outcome type | Studies (values) | EDmax (95% CI) | Max effect (95% CI) | Overall test (χ², df, p) | Non-linearity test (p) | Adjusted R² |
| --- | --- | --- | --- | --- | --- | --- |
| Symptom score |  |  |  |  |  |  |
| Acute | 105 (126) | 1,807 (873–2,741) | SMD 0.73 (0.59–0.87) | 106.21, (2), <0.0001 | 0.0007 | 0.434 |
| Follow-up | 30 (35) | 1,275 (872–1,678) | SMD 1.23 (0.63–1.83) | 25.03, (2), <0.0001 | 0.031 | 0.376 |
| Response |  |  |  |  |  |  |
| Acute | 87 (100) | 2,169 (1,829–2,509) | RR 2.56 (2.14–3.03) | 109.40, (2), <0.0001 | <0.001 | 0.535 |
| Follow-up | 14 (16) | 1,616 (1,476–1,756) | RR 2.12 (1.43–3.16) | 13.98, (2), 0.0009 | 0.0016 | 0.046 |
| Remission |  |  |  |  |  |  |
| Acute | 58 (72) | 1801 (1,606–1,996) | RR 2.83 (2.27–3.56) | 83.65, (2), <0.0001 | <0.001 | 0.434 |
| Follow-up | 11 (11) | 1,840 (1,488–2,193) | RR 1.48 (1.13–1.92) | 8.02, (2), 0.018 | 0.028 | 0.376 |

**Table S5**. Dose-response associations of rTMS with total sessions for depressive symptoms, treatment response, and remission.

| Outcome type | Studies (values) | EDmax (95% CI) | Max effect (95% CI) | Overall test (χ², df, p) | Non-linearity test (p) | Adjusted R² |
| --- | --- | --- | --- | --- | --- | --- |
| Symptom score |  |  |  |  |  |  |
| Acute | 105 (126) | 14 (11–17) | SMD 0.81 (0.64–0.98) | 103.34, (2), <0.0001 | <0.001 | 0.434 |
| Follow-up | 30 (35) | –– | SMD 1.05 (0.57–1.52) | 26.01, (2), <0.0001 | 0.138 | 0.322 |
| Response |  |  |  |  |  |  |
| Acute | 87 (100) | 16 (12–19) | RR 2.29 (1.90–2.77) | 97.14, (2), <0.0001 | 0.0001 | 0.411 |
| Follow-up | 14 (16) | 14 (12–16) | RR 1.97 (1.22–3.16) | 9.87, (2), 0.007 | 0.060 | 0.098 |
| Remission |  |  |  |  |  |  |
| Acute | 58 (72) | 23 (17–29) | RR 2.83 (2.27–3.56) | 53.10, (2), <0.0001 | 0.003 | 0.393 |
| Follow-up | 11 (11) | – (linear, no clear peak) | – (trend not significant) | 5.09, (2), 0.078 | 0.955 | 0.322 |

**Table S6**. Dose-response associations of rTMS with treatment duration (week) for depressive symptoms, treatment response, and remission.

| Outcome type | Studies (values) | EDmax (95% CI) | Max effect (95% CI) | Overall test (χ², df, p) | Non-linearity test (p) | Adjusted R² |
| --- | --- | --- | --- | --- | --- | --- |
| Symptom score |  |  |  |  |  |  |
| Acute | 105 (126) | 2.9 (2.4–3.5) | SMD 0.84 (0.67–1.00) | 105.72, (2), <0.0001 | <0.001 | 0.450 |
| Follow-up | 30 (35) | 2.8 (2.5–3.5) | SMD 1.36 (0.83–1.88) | 25.88, (2), <0.0001 | 0.138 | 0.339 |
| Response |  |  |  |  |  |  |
| Acute | 87 (100) | 2.7 (2.2–3.2) | RR 2.39 (1.99–2.89) | 112.46, (2), <0.0001 | <0.001 | 0.478 |
| Follow-up | 14 (16) | 2.9 (2.4–3.5) | RR 2.03 (1.36–3.00) | 12.54, (2), 0.007 | 0.002 | 0.005 |
| Remission |  |  |  |  |  |  |
| Acute | 58 (72) | 3.1 (2.5–3.7) | RR 2.56 (2.01–3.32) | 62.80, (2), <0.0001 | <0.001 | 0.455 |
| Follow-up | 11 (11) | 3.3 (2.6–4.0) | RR 1.36 (1.12–1.66) | 9.33, (2), 0.078 | 0.009 | 0.282 |

**Table S7**. Dose-response associations of rTMS subgroup with total pulses for depressive symptoms, treatment response, and remission.

| Outcome type | Studies (values) | EDmax (95% CI) | Max effect (95% CI) | Overall test (χ², df, p) | Non-linearity test (p) | Adjusted R² |
| --- | --- | --- | --- | --- | --- | --- |
| Symptom score |  |  |  |  |  |  |
| Acute | 84 (98) | 28,895 (15,520–42,271) | SMD 0.81 (0.62–0.99) | 74.31 (2), <0.0001 | <0.001 | 0.428 |
| Follow-up | 26 (30) | 24488 (9,147–39,828) | SMD 1.12 (0.50–1.74) | 14.10 (2), 0.0009 | 0.091 | 0.261 |
| Response |  |  |  |  |  |  |
| Acute | 72 (79) | 38,668 (33,019–44,317) | RR 2.53 (2.12–3.06) | 95.70 (2), <0.0001 | <0.001 | 0.545 |
| Follow-up | 10 (11) | 26,501 (12,327–40,674) | RR 1.90 (1.19–3.03) | 9.01 (2), 0.011 | 0.162 | 0.029 |
| Remission |  |  |  |  |  |  |
| Acute | 49 (60) | 38,170 (33,747–42,592) | RR 3.00 (2.20–4.14) | 49.38 (2), <0.0001 | <0.001 | 0.452 |
| Follow-up | 8 (8) | 46,687 (6,059–87,315) | RR 1.39 (1.07–1.80) | 6.06 (2), 0.048 | 0.148 | 0.434 |

**Table S8**. Dose-response associations of TBS subgroup with total pulses for depressive symptoms, treatment response, and remission.

| Outcome type | Studies (values) | EDmax (95% CI) | Max effect (95% CI) | Overall test (χ², df, p) | Non-linearity test (p) | Adjusted R² |
| --- | --- | --- | --- | --- | --- | --- |
| Symptom score |  |  |  |  |  |  |
| Acute | 26 (29) | – | – | 32.08 (2), <0.0001 | 0.029 | 0.474 |
| Follow-up | 5 (5) | – | – | 21.08 (2), <0.0001 | 0.368 | 0.860 |
| Response |  |  |  |  |  |  |
| Acute | 20 (21) | 40,996 (26,031–55,960) | RR 2.92 (1.82–4.62) | 22.25 (2), <0.0001 | 0.041 | 0.266 |
| Follow-up | 5 (5) | 40839 (32,466–49,212) | RR 5.05 (1.55–16.28) | 7.32 (2), 0.026 | 0.029 | −0.176 |
| Remission |  |  |  |  |  |  |
| Acute | 12 (12) | 58,813 (-63,518–181,143) | RR 2.27 (1.23–4.22) | 7.64 (2), 0.022 | 0.501 | 0.030 |
| Follow-up | 3 (3) | – | – | 2.84 (2), 0.241 | 0.194 | −0.974 |

**Table S9**. Dose-response associations of rTMS subgroup with pulses per session for depressive symptoms, treatment response, and remission.

| Outcome type | Studies (values) | EDmax (95% CI) | Max effect (95% CI) | Overall test (χ², df, p) | Non-linearity test (p) | Adjusted R² |
| --- | --- | --- | --- | --- | --- | --- |
| Symptom score |  |  |  |  |  |  |
| Acute | 84 (98) | 1,564 (1,041–2,087) | SMD 0.72 (0.54–0.89) | 73.44 (2), <0.0001 | 0.002 | 0.432 |
| Follow-up | 26 (30) | 1,254 (922–1,586) | SMD 1.15 (0.46–1.84) | 16.20 (2), 0.0003 | 0.046 | 0.322 |
| Response |  |  |  |  |  |  |
| Acute | 72 (79) | 2,340 (1,729–2,952) | RR 2.43 (2.05–2.89) | 104.52 (2), <0.0001 | <0.001 | 0.570 |
| Follow-up | 10 (11) | – | – | 7.69 (2), 0.021 | 0.296 | −0.117 |
| Remission |  |  |  |  |  |  |
| Acute | 49 (60) | 1,852 (1,628–2,075) | RR 2.94 (2.32–3.74) | 77.71 (2), <0.0001 | <0.001 | 0.506 |
| Follow-up | 8 (8) | 2,245 (-276–4,765) | RR 1.31 (1.05–1.62) | 5.94 (2), 0.051 | 0.321 | 0.419 |

**Table S10**. Dose-response associations of TBS subgroup with pulses per session for depressive symptoms, treatment response, and remission.

| Outcome type | Studies (values) | EDmax (95% CI) | Max effect (95% CI) | Overall test (χ², df, p) | Non-linearity test (p) | Adjusted R² |
| --- | --- | --- | --- | --- | --- | --- |
| Symptom score |  |  |  |  |  |  |
| Acute | 26 (29) | – | – | 40.67 (2), <0.0001 | 0.130 | 0.519 |
| Follow-up | 5 (5) | – | – | 20.13 (2), <0.0001 | 0.370 | 0.739 |
| Response |  |  |  |  |  |  |
| Acute | 20 (21) | 2,055 (1,714–2,395) | RR 3.46 (2.29–5.26) | 35.16 (2), <0.0001 | 0.004 | 0.592 |
| Follow-up | 5 (5) | 1,889 (1,817–1,961) | RR 3.49 (2.14–5.75) | 25.68 (2), <0.0001 | <0.001 | 0.981 |
| Remission |  |  |  |  |  |  |
| Acute | 12 (12) | 2,123 (780–3,465) | RR 3.22 (1.55–6.62) | 10.96 (2), 0.004 | 0.238 | 0.331 |
| Follow-up | 3 (3) | 1,932 (1,852–2,013) | RR 5.31 (1.92–14.75) | 11.76 (2), 0.003 | <0.001 | 0.981 |

**Table S11**. Dose-response associations of rTMS subgroup with total sessions for depressive symptoms, treatment response, and remission.

| Outcome type | Studies (values) | EDmax (95% CI) | Max effect (95% CI) | Overall test (χ², df, p) | Non-linearity test (p) | Adjusted R² |
| --- | --- | --- | --- | --- | --- | --- |
| Symptom score |  |  |  |  |  |  |
| Acute | 84 (98) | 17 (15–`19) | SMD 0.89 (0.71–1.07) | 98.22 (2), <0.0001 | 0.011 | 0.462 |
| Follow-up | 26 (30) | 13 (11–`15) | SMD 1.24 (0.70–1.78) | 20.75 (2), <0.0001 | 0.201 | 0.304 |
| Response |  |  |  |  |  |  |
| Acute | 72 (79) | 15 (14–`16) | RR 2.36 (1.92–2.94) | 88.49 (2), <0.0001 | <0.001 | 0.476 |
| Follow-up | 10 (11) | – | – | 5.87 (2), 0.053 | 0.447 | −0.006 |
| Remission |  |  |  |  |  |  |
| Acute | 49 (60) | 16 (15–`17) | RR 2.86 (2.18–3.71) | 72.27 (2), <0.0001 | <0.001 | 0.567 |
| Follow-up | 8 (8) | 18 (16–`20) | RR 1.28 (1.03–1.58) | 6.03 (2), 0.049 | 0.586 | 0.431 |

**Table S12**. Dose-response associations of TBS subgroup with total sessions for depressive symptoms, treatment response, and remission.

| Outcome type | Studies (values) | EDmax (95% CI) | Max effect (95% CI) | Overall test (χ², df, p) | Non-linearity test (p) | Adjusted R² |
| --- | --- | --- | --- | --- | --- | --- |
| Symptom score |  |  |  |  |  |  |
| Acute | 26 (29) | 10 (7–`13) | SMD 0.61 (0.37–0.86) | 26.54 (2), <0.0001 | 0.0004 | 0.422 |
| Follow-up | 5 (5) | 8 (5–`11) | SMD 1.50 (0.65–2.34) | 19.96 (2), <0.0001 | 0.010 | 0.494 |
| Response |  |  |  |  |  |  |
| Acute | 20 (21) | 15 (12–`18) | RR 3.63 (1.86–7.10) | 19.09 (2), 0.0001 | 0.025 | 0.356 |
| Follow-up | 5 (5) | – | – | 4.37 (2), 0.113 | 0.972 | 0.230 |
| Remission |  |  |  |  |  |  |
| Acute | 12 (12) | – | – | 10.77 (2), 0.005 | 0.417 | 0.352 |
| Follow-up | 3 (3) | – | – | 0.30 (2), 0.862 | 0.827 | −0.270 |

**Table S13**. Dose-response associations of rTMS subgroup with treatment duration (week) for depressive symptoms, treatment response, and remission.

| Outcome type | Studies (values) | EDmax (95% CI) | Max effect (95% CI) | Overall test (χ², df, p) | Non-linearity test (p) | Adjusted R² |
| --- | --- | --- | --- | --- | --- | --- |
| Symptom score |  |  |  |  |  |  |
| Acute | 84 (98) | 3.0 (2.5–`3.5) | SMD 0.92 (0.72–1.11) | 86.34 (2), <0.0001 | <0.001 | 0.438 |
| Follow-up | 26 (30) | 2.9 (2.5–`3.3) | SMD 1.28 (0.73–1.84) | 20.83 (2), <0.0001 | 0.163 | 0.310 |
| Response |  |  |  |  |  |  |
| Acute | 72 (79) | 3.0 (2.6–`3.4) | RR 2.23 (1.82–2.69) | 87.22 (2), <0.0001 | <0.001 | 0.481 |
| Follow-up | 10 (11) | – | – | 5.86 (2), 0.053 | 0.447 | −0.006 |
| Remission |  |  |  |  |  |  |
| Acute | 49 (60) | 3 (2.5–`3.5) | RR 2.72 (2.08–3.56) | 64.45 (2), <0.0001 | 0.003 | 0.536 |
| Follow-up | 8 (8) | 3.5 (1.2–`5.8) | RR 1.27 (1.05–1.55) | 6.03 (2), 0.049 | 0.586 | 0.431 |

**Table S14**. Dose-response associations of TBS subgroup with treatment duration (week) for depressive symptoms, treatment response, and remission.

| Outcome type | Studies (values) | EDmax (95% CI) | Max effect (95% CI) | Overall test (χ², df, p) | Non-linearity test (p) | Adjusted R² |
| --- | --- | --- | --- | --- | --- | --- |
| Symptom score |  |  |  |  |  |  |
| Acute | 26 (29) | 2.0 (1.8–`2.2) | SMD 0.68 (0.52–0.85) | 68.51 (2), <0.0001 | <0.001 | 0.580 |
| Follow-up | 5 (5) | 2.0 (1.7–`2.3) | SMD 1.45 (0.13–2.77) | 18.92 (2), 0.0001 | 0.349 | 0.596 |
| Response |  |  |  |  |  |  |
| Acute | 20 (21) | 2.0 (1.8–`2.2) | RR 2.92 (1.90–4.48) | 25.01 (2), <0.0001 | <0.001 | 0.509 |
| Follow-up | 5 (5) | – | – | 20.89 (2), <0.0001 | 0.359 | 0.786 |
| Remission |  |  |  |  |  |  |
| Acute | 12 (12) | 2.5 (1.5–`3.5) | RR 2.69 (1.26–5.81) | 6.47 (2), 0.039 | 0.036 | 0.124 |
| Follow-up | 3 (3) | – | – | 1.89 (2), 0.389 | 0.198 | 0.059 |

**Table S15**. Tests of Heterogeneity and Publication Bias Across rTMS Dosing Parameters and Clinical Outcomes.

| Stratum | tau2 | I2_percent | Q_p | Egger_SE_beta | Egger_SE_p |
| --- | --- | --- | --- | --- | --- |
| Total pulses |  |  |  |  |  |
| Acute depressive-symptom severity | 0.581296 | 3.05 | 0.122 | -0.0949 | 0.441 |
| Follow-up depressive-symptom severity | 17.56435 | 59.01 | 1.19E-17 | 0.0997 | 0.774 |
| Acute response | 0.155672 | 50.13 | 3.09E-06 | 0.0465 | 0.856 |
| Follow-up response | 0.201376 | 81.14 | 2.02E-05 | -0.27 | 0.247 |
| Acute remission | 0.041141 | 9.14 | 0.146 | 0.0853 | 0.776 |
| Follow-up remission | 0.119306 | 62.13 | 0.129 | 1.72 | 0.0113 |
| Pulses per session |  |  |  |  |  |
| Acute depressive-symptom severity | 0.581296 | 3.05 | 0.122 | -0.101 | 0.408 |
| Follow-up depressive-symptom severity | 24.0599 | 73.5 | 4.61E-10 | 0.408 | 0.568 |
| Acute response | 0.157629 | 48.45 | 4.10E-06 | 0.408 | 0.568 |
| Follow-up response | 0.201376 | 81.14 | 2.02E-05 | -0.611 | 0.277 |
| Acute remission | 0.041141 | 9.14 | 0.146 | 0.392 | 0.462 |
| Follow-up remission | 0.119306 | 62.13 | 0.129 | 1.74 | 0.00583 |
| Total sessions |  |  |  |  |  |
| Acute depressive-symptom severity | 0.581296 | 3.05 | 0.122 | -0.207 | 0.0953 |
| Follow-up depressive-symptom severity | 17.56435 | 59.01 | 1.19E-17 | 0.0586 | 0.861 |
| Acute response | 0.157629 | 48.45 | 4.10E-06 | -0.197 | 0.461 |
| Follow-up response | 0.201376 | 81.14 | 2.02E-05 | 2.02 | 1.76E-06 |
| Acute remission | 0.041141 | 9.14 | 0.146 | 0.112 | 0.862 |
| Follow-up remission | 0.119306 | 62.13 | 0.129 | 1.31 | 0.0683 |
| Treatment duration |  |  |  |  |  |
| Acute depressive-symptom severity | 0.581296 | 3.05 | 0.122 | -0.209 | 0.0912 |
| Follow-up depressive-symptom severity | 17.56435 | 59.01 | 1.19E-17 | 0.0141 | 0.965 |
| Acute response | 0.157629 | 48.45 | 4.10E-06 | -0.24 | 0.275 |
| Follow-up response | -0.24 | -0.24 | -0.24 | -0.24 | 0.275 |
| Acute remission | 0.041141 | 9.14 | 0.146 | 0.248 | 0.316 |
| Follow-up remission | 0.119306 | 62.13 | 0.129 | 0.789 | 0.100 |

**Fig. S1**. Summary of risk of bias across the 108 included studies.


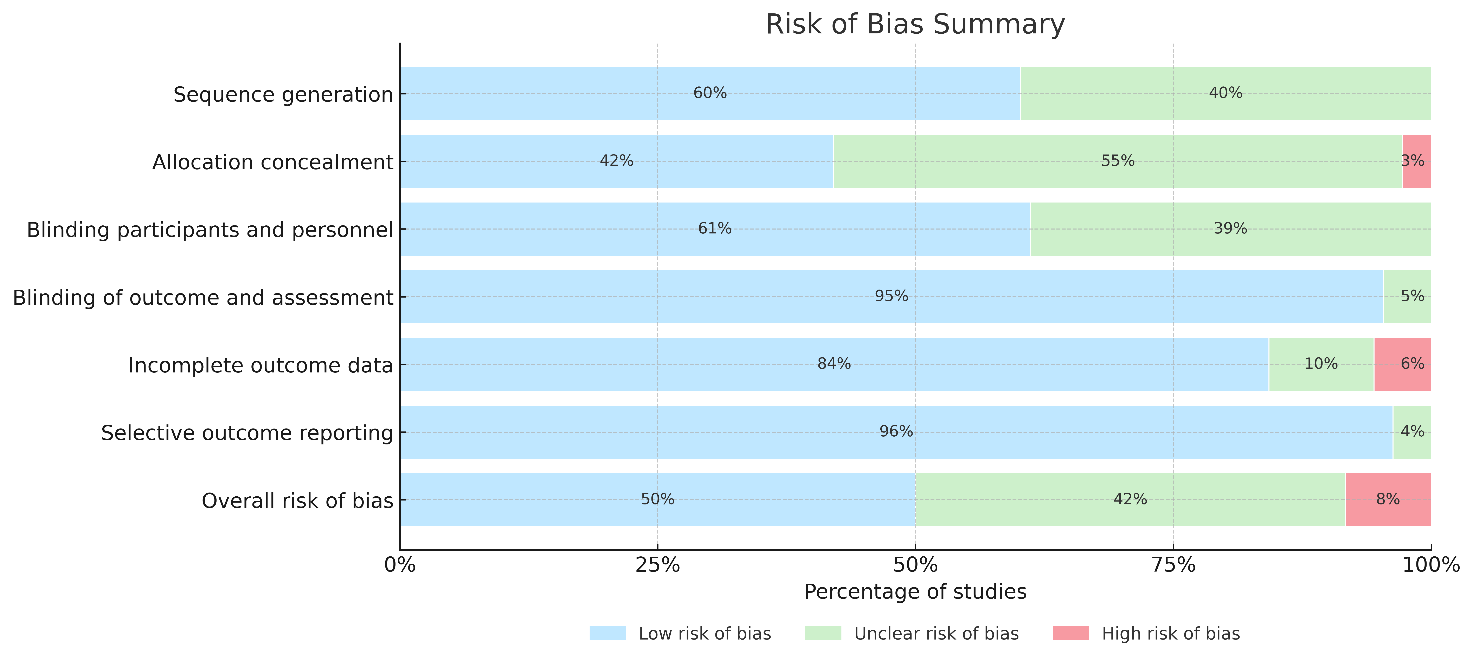


**Fig. S2**. Dose-response associations of rTMS subgroup with total pulses across depressive-symptom, treatment-response, and remission outcomes.


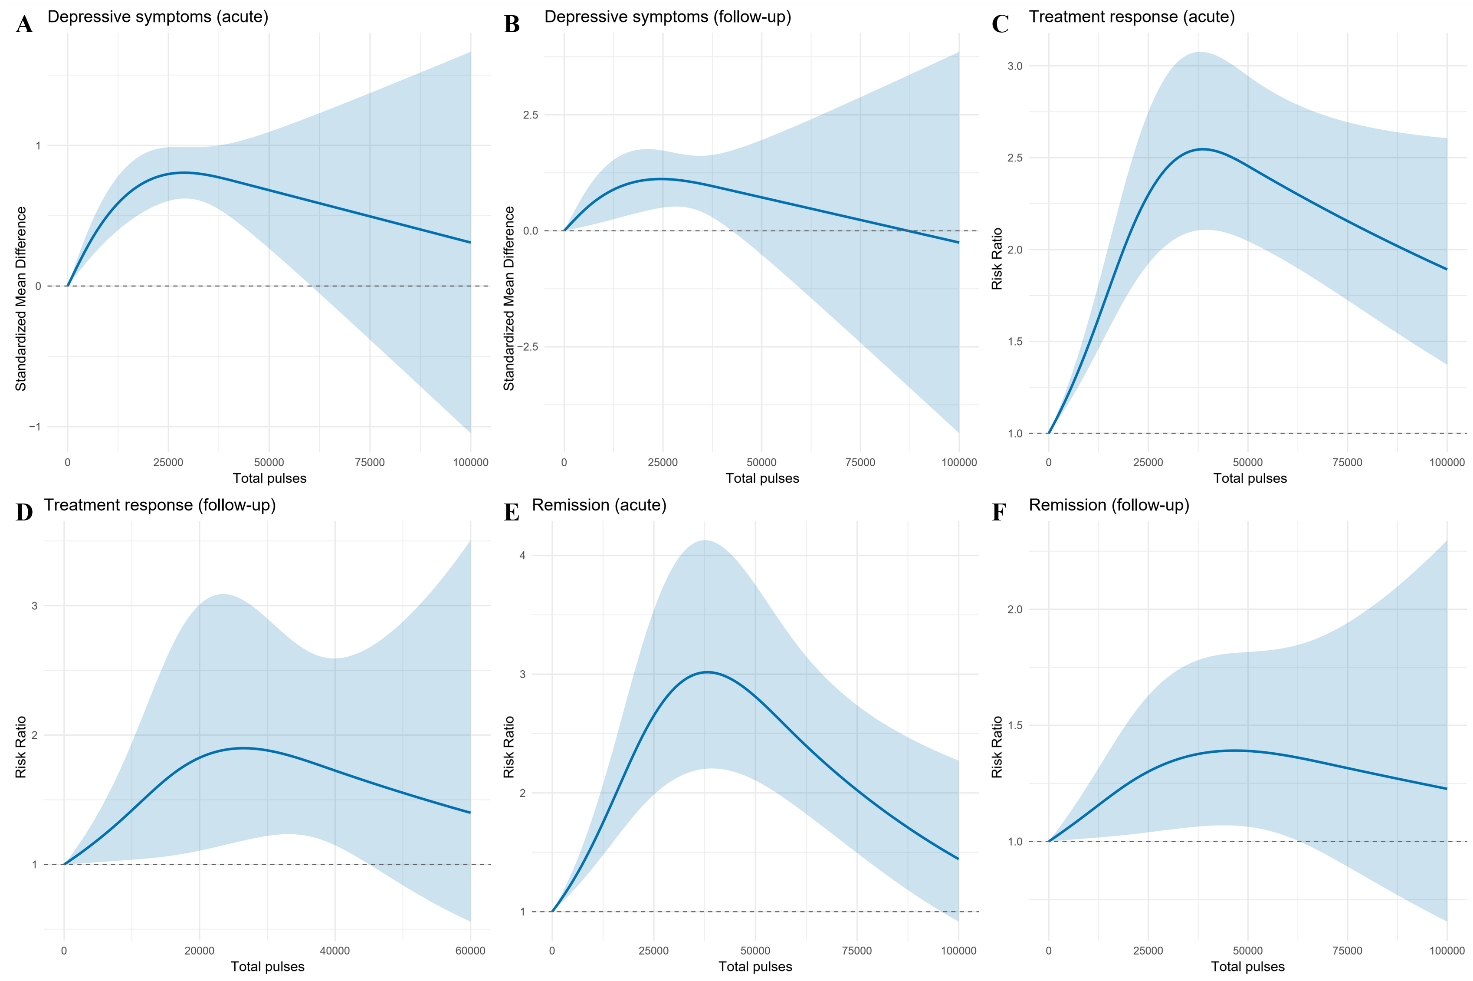


Panels A–B display standardized mean differences (SMDs) for continuous depressive-symptom scores, and Panels C–F display risk ratios (RR) for binary endpoints (treatment response and remission), during acute and follow-up periods. Curves were fitted using one-stage random-effects restricted cubic spline models with REML estimation. Shaded areas indicate pointwise 95% confidence intervals.

**Fig. S3**. Dose-response associations of rTMS subgroup with pulses per session across depressive-symptom, treatment-response, and remission outcomes.


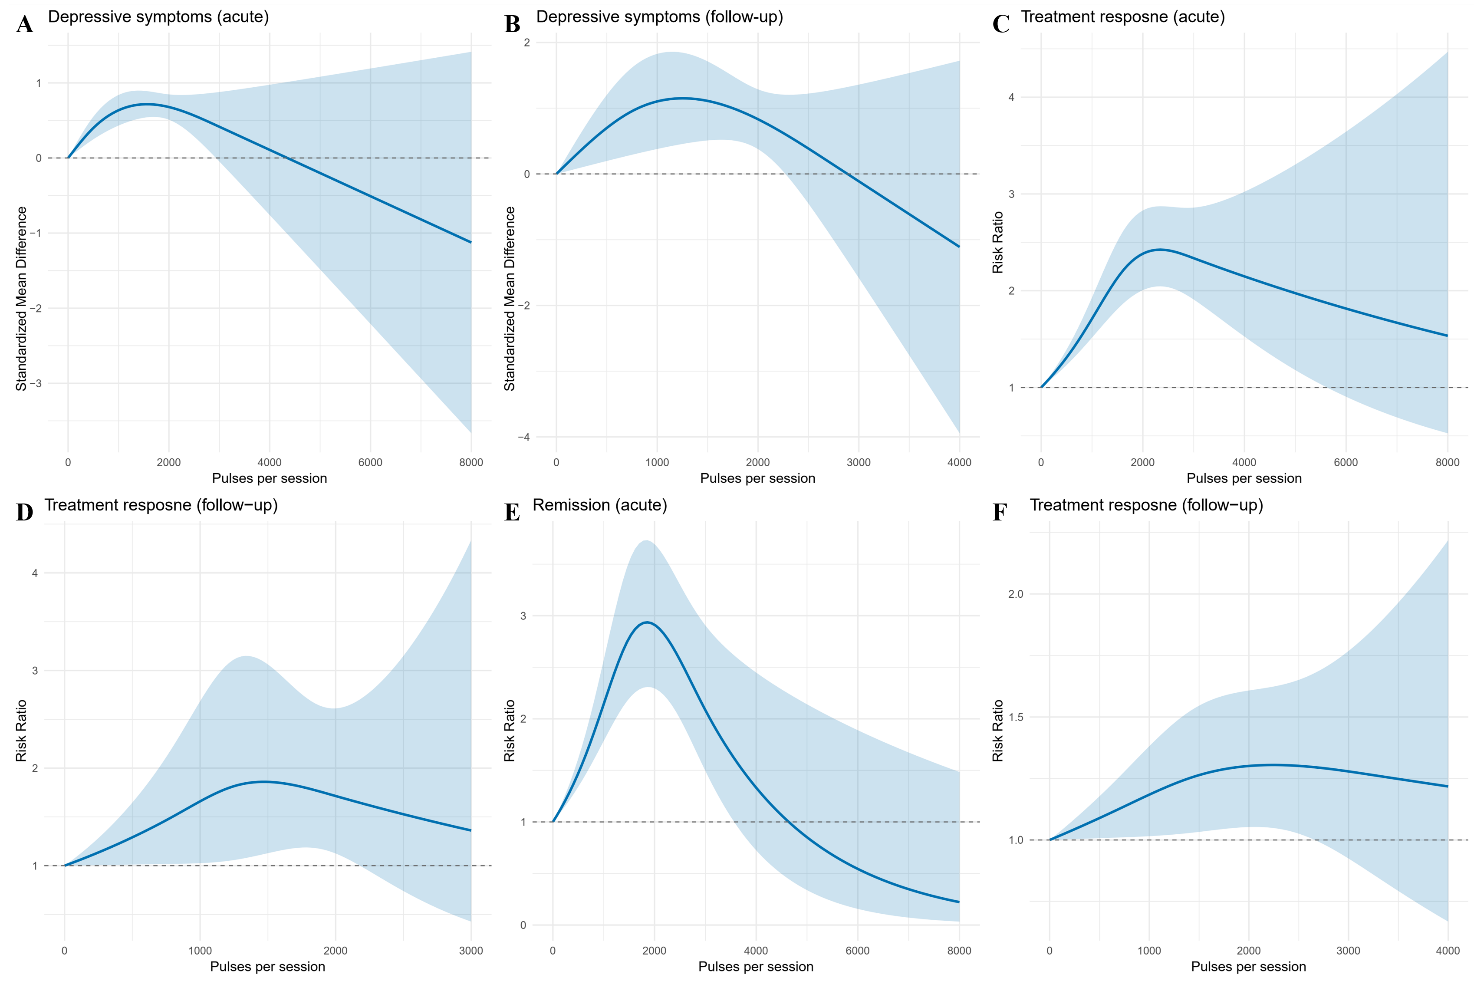


Panels A–B display standardized mean differences (SMDs) for continuous depressive-symptom scores, and Panels C–F display risk ratios (RR) for binary endpoints (treatment response and remission), during acute and follow-up periods. Curves were fitted using one-stage random-effects restricted cubic spline models with REML estimation. Shaded areas indicate pointwise 95% confidence intervals.

**Fig. S4**. Dose-response associations of rTMS subgroup with total sessions across depressive-symptom, treatment-response, and remission outcomes.


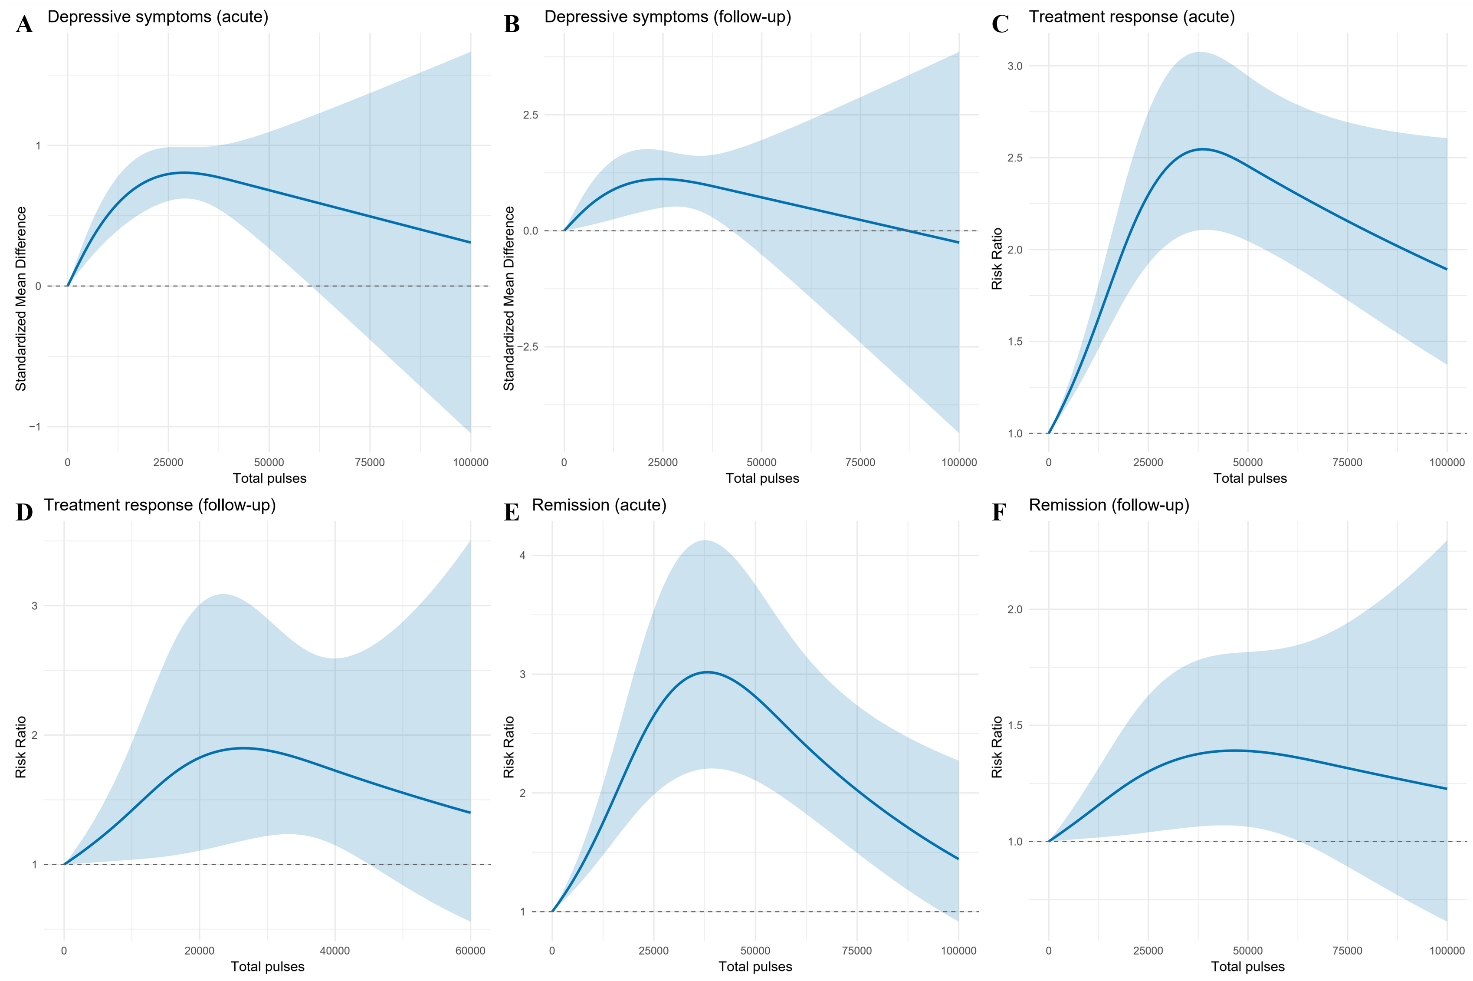


Panels A–B display standardized mean differences (SMDs) for continuous depressive-symptom scores, and Panels C–F display risk ratios (RR) for binary endpoints (treatment response and remission), during acute and follow-up periods. Curves were fitted using one-stage random-effects restricted cubic spline models with REML estimation. Shaded areas indicate pointwise 95% confidence intervals.

**Fig. S5**. Dose-response associations of rTMS subgroup with treatment duration (week) across depressive-symptom, treatment-response, and remission outcomes.


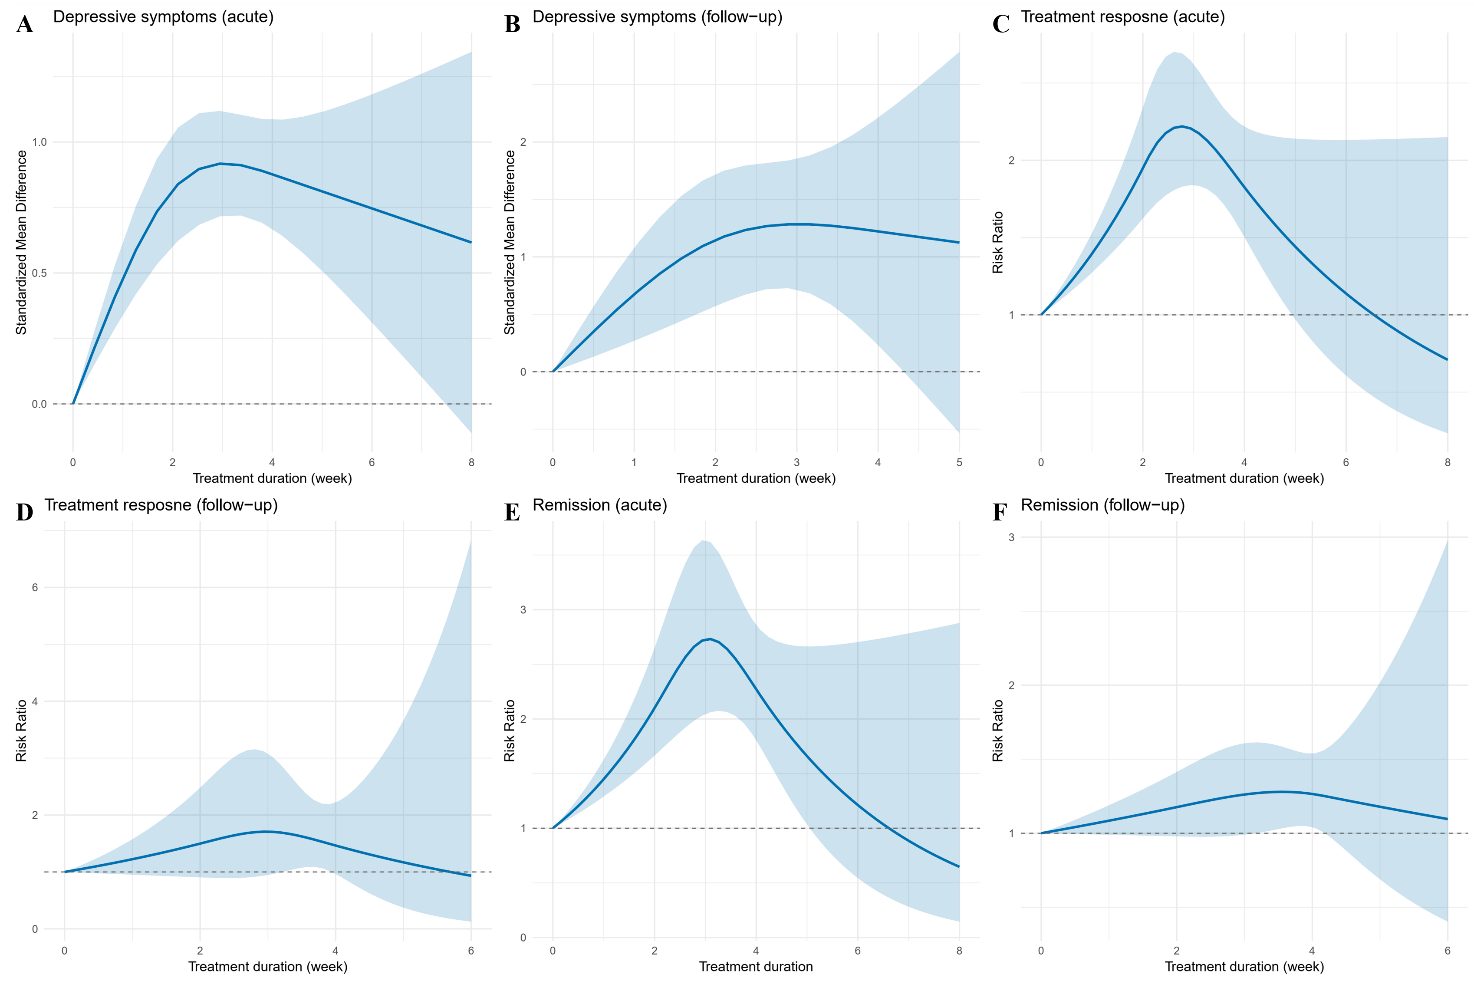


Panels A–B display standardized mean differences (SMDs) for continuous depressive-symptom scores, and Panels C–F display risk ratios (RR) for binary endpoints (treatment response and remission), during acute and follow-up periods. Curves were fitted using one-stage random-effects restricted cubic spline models with REML estimation. Shaded areas indicate pointwise 95% confidence intervals.

**Fig. S6**. Dose-response associations of TBS subgroup with total pulses across depressive-symptom, treatment-response, and remission outcomes.


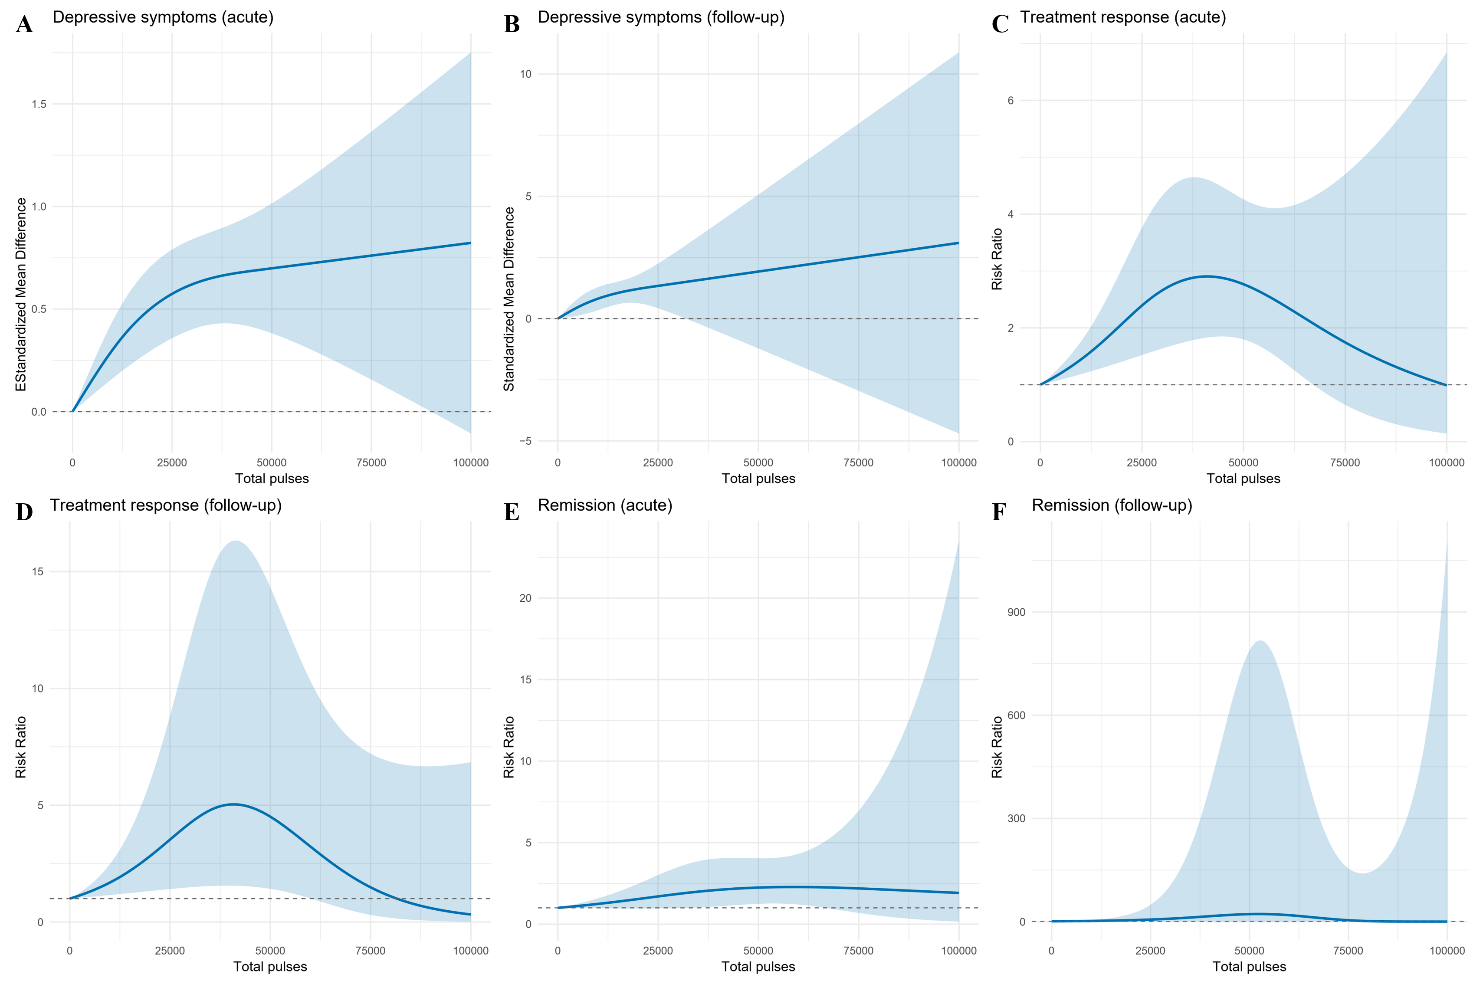


Panels A–B display standardized mean differences (SMDs) for continuous depressive-symptom scores, and Panels C–F display risk ratios (RR) for binary endpoints (treatment response and remission), during acute and follow-up periods. Curves were fitted using one-stage random-effects restricted cubic spline models with REML estimation. Shaded areas indicate pointwise 95% confidence intervals.

**Fig. S7**. Dose-response associations of TBS subgroup with pulses per session across depressive-symptom, treatment-response, and remission outcomes.


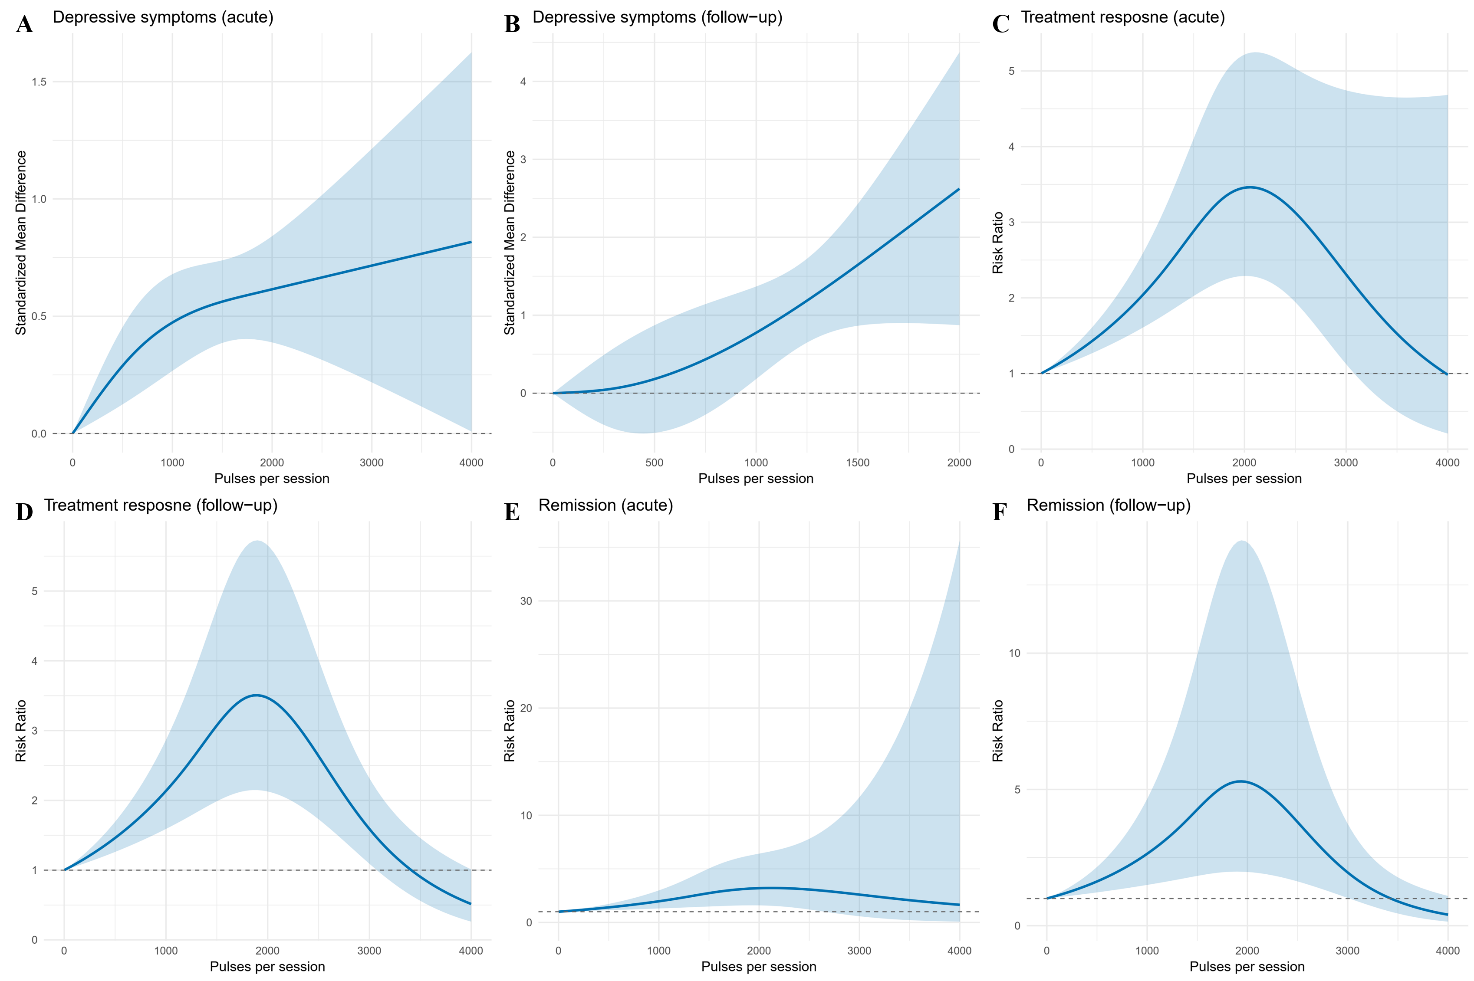


Panels A–B display standardized mean differences (SMDs) for continuous depressive-symptom scores, and Panels C–F display risk ratios (RR) for binary endpoints (treatment response and remission), during acute and follow-up periods. Curves were fitted using one-stage random-effects restricted cubic spline models with REML estimation. Shaded areas indicate pointwise 95% confidence intervals.

V

**Fig. S8**. Dose-response associations of TBS subgroup with total sessions across depressive-symptom, treatment-response, and remission outcomes.


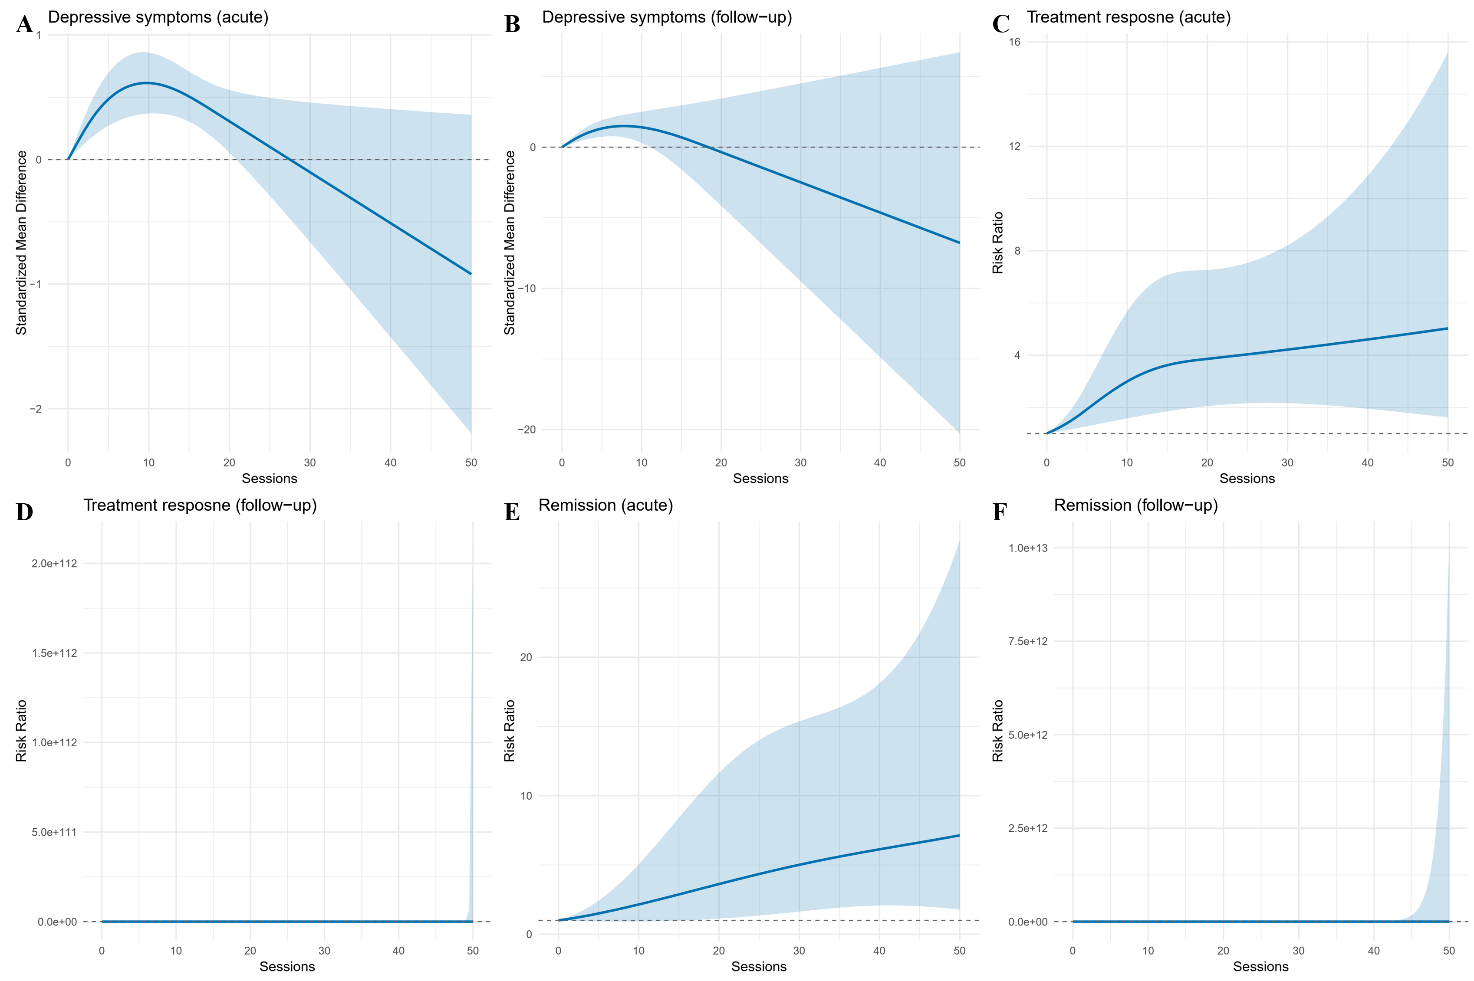


Panels A–B display standardized mean differences (SMDs) for continuous depressive-symptom scores, and Panels C–F display risk ratios (RR) for binary endpoints (treatment response and remission), during acute and follow-up periods. Curves were fitted using one-stage random-effects restricted cubic spline models with REML estimation. Shaded areas indicate pointwise 95% confidence intervals.

**Fig. S9**. Dose-response associations of TBS subgroup with treatment duration (week) across depressive-symptom, treatment-response, and remission outcomes.


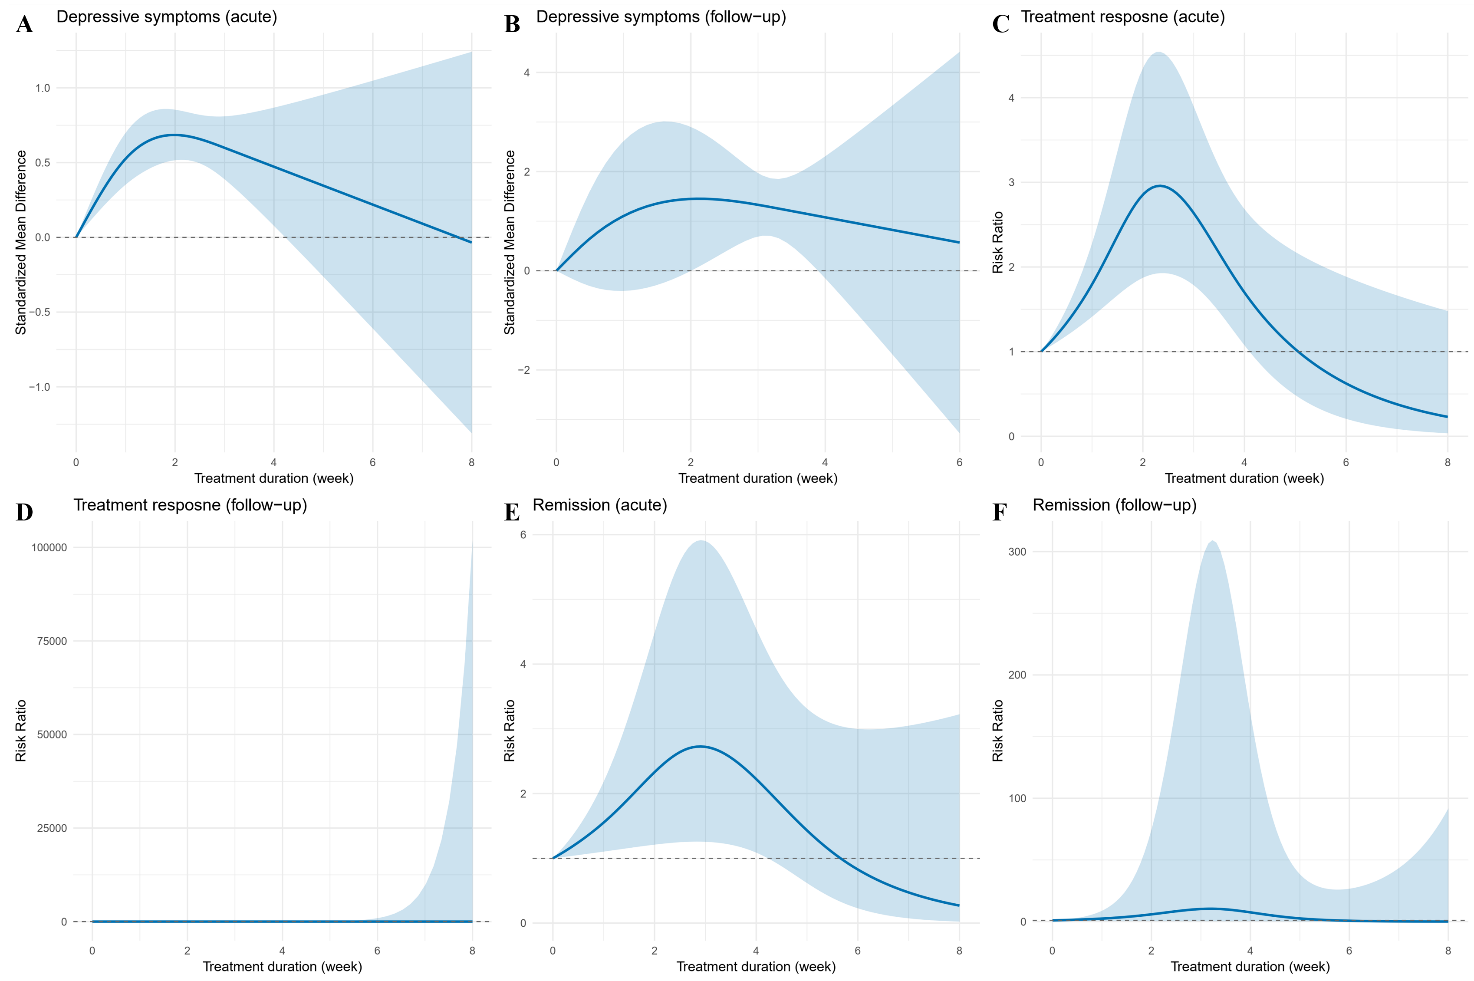


Panels A–B display standardized mean differences (SMDs) for continuous depressive-symptom scores, and Panels C–F display risk ratios (RR) for binary endpoints (treatment response and remission), during acute and follow-up periods. Curves were fitted using one-stage random-effects restricted cubic spline models with REML estimation. Shaded areas indicate pointwise 95% confidence intervals.

**Fig. S10**. Leave-one-out sensitivity analyses for total-pulse-based dose-response models of rTMS.


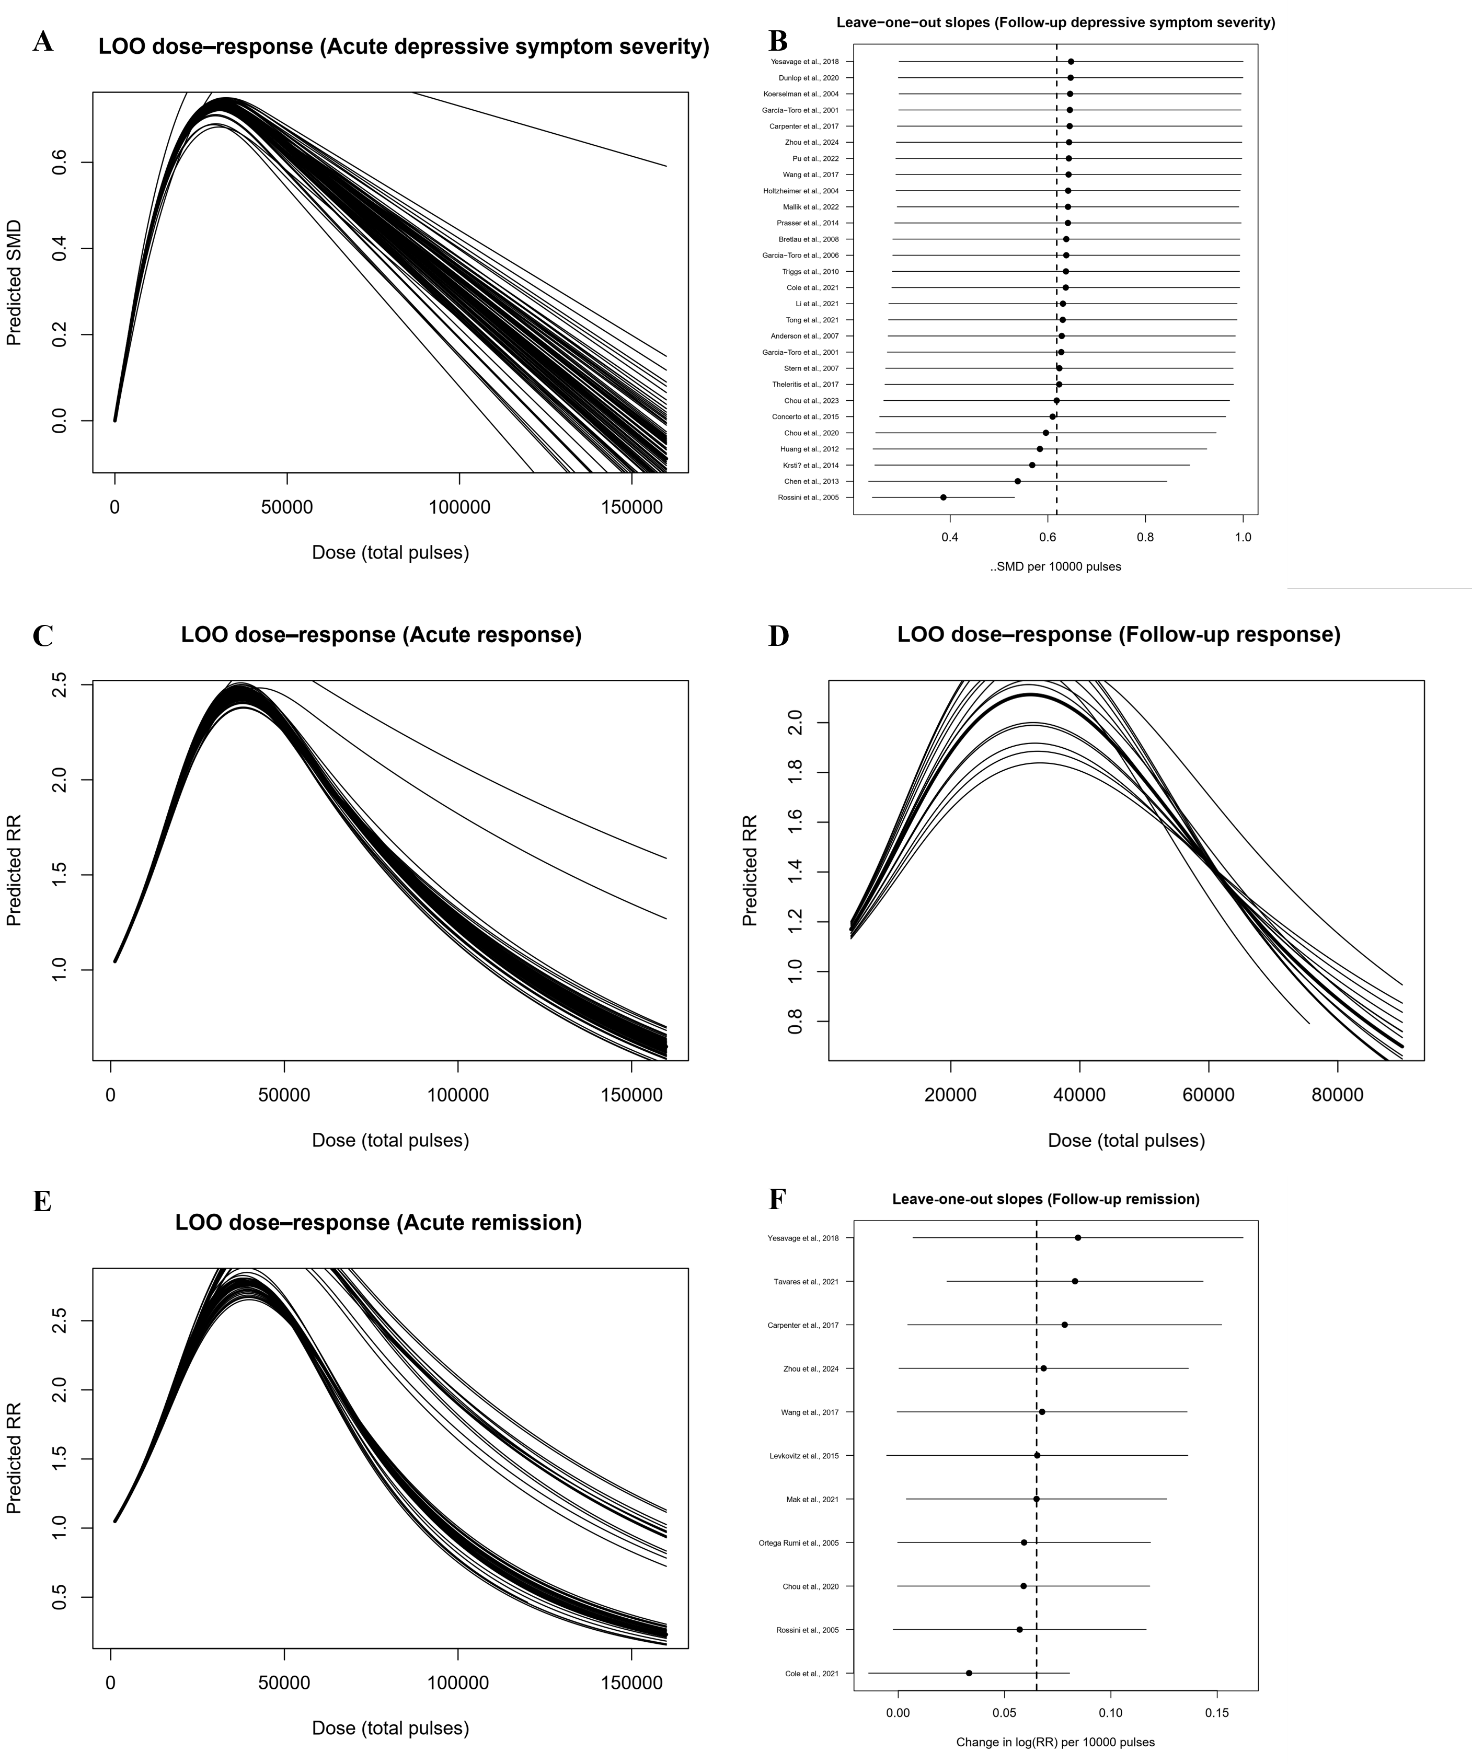


Panels A–E show leave-one-out (LOO) refits of restricted cubic spline models for acute and follow up outcomes (symptom severity, response, and remission), while panels B and F summarize LOO slopes from one-stage random-effects meta-regression models.

**Fig. S11.** Leave-one-out sensitivity analyses for pulses-per-session–based dose–response models of rTMS.


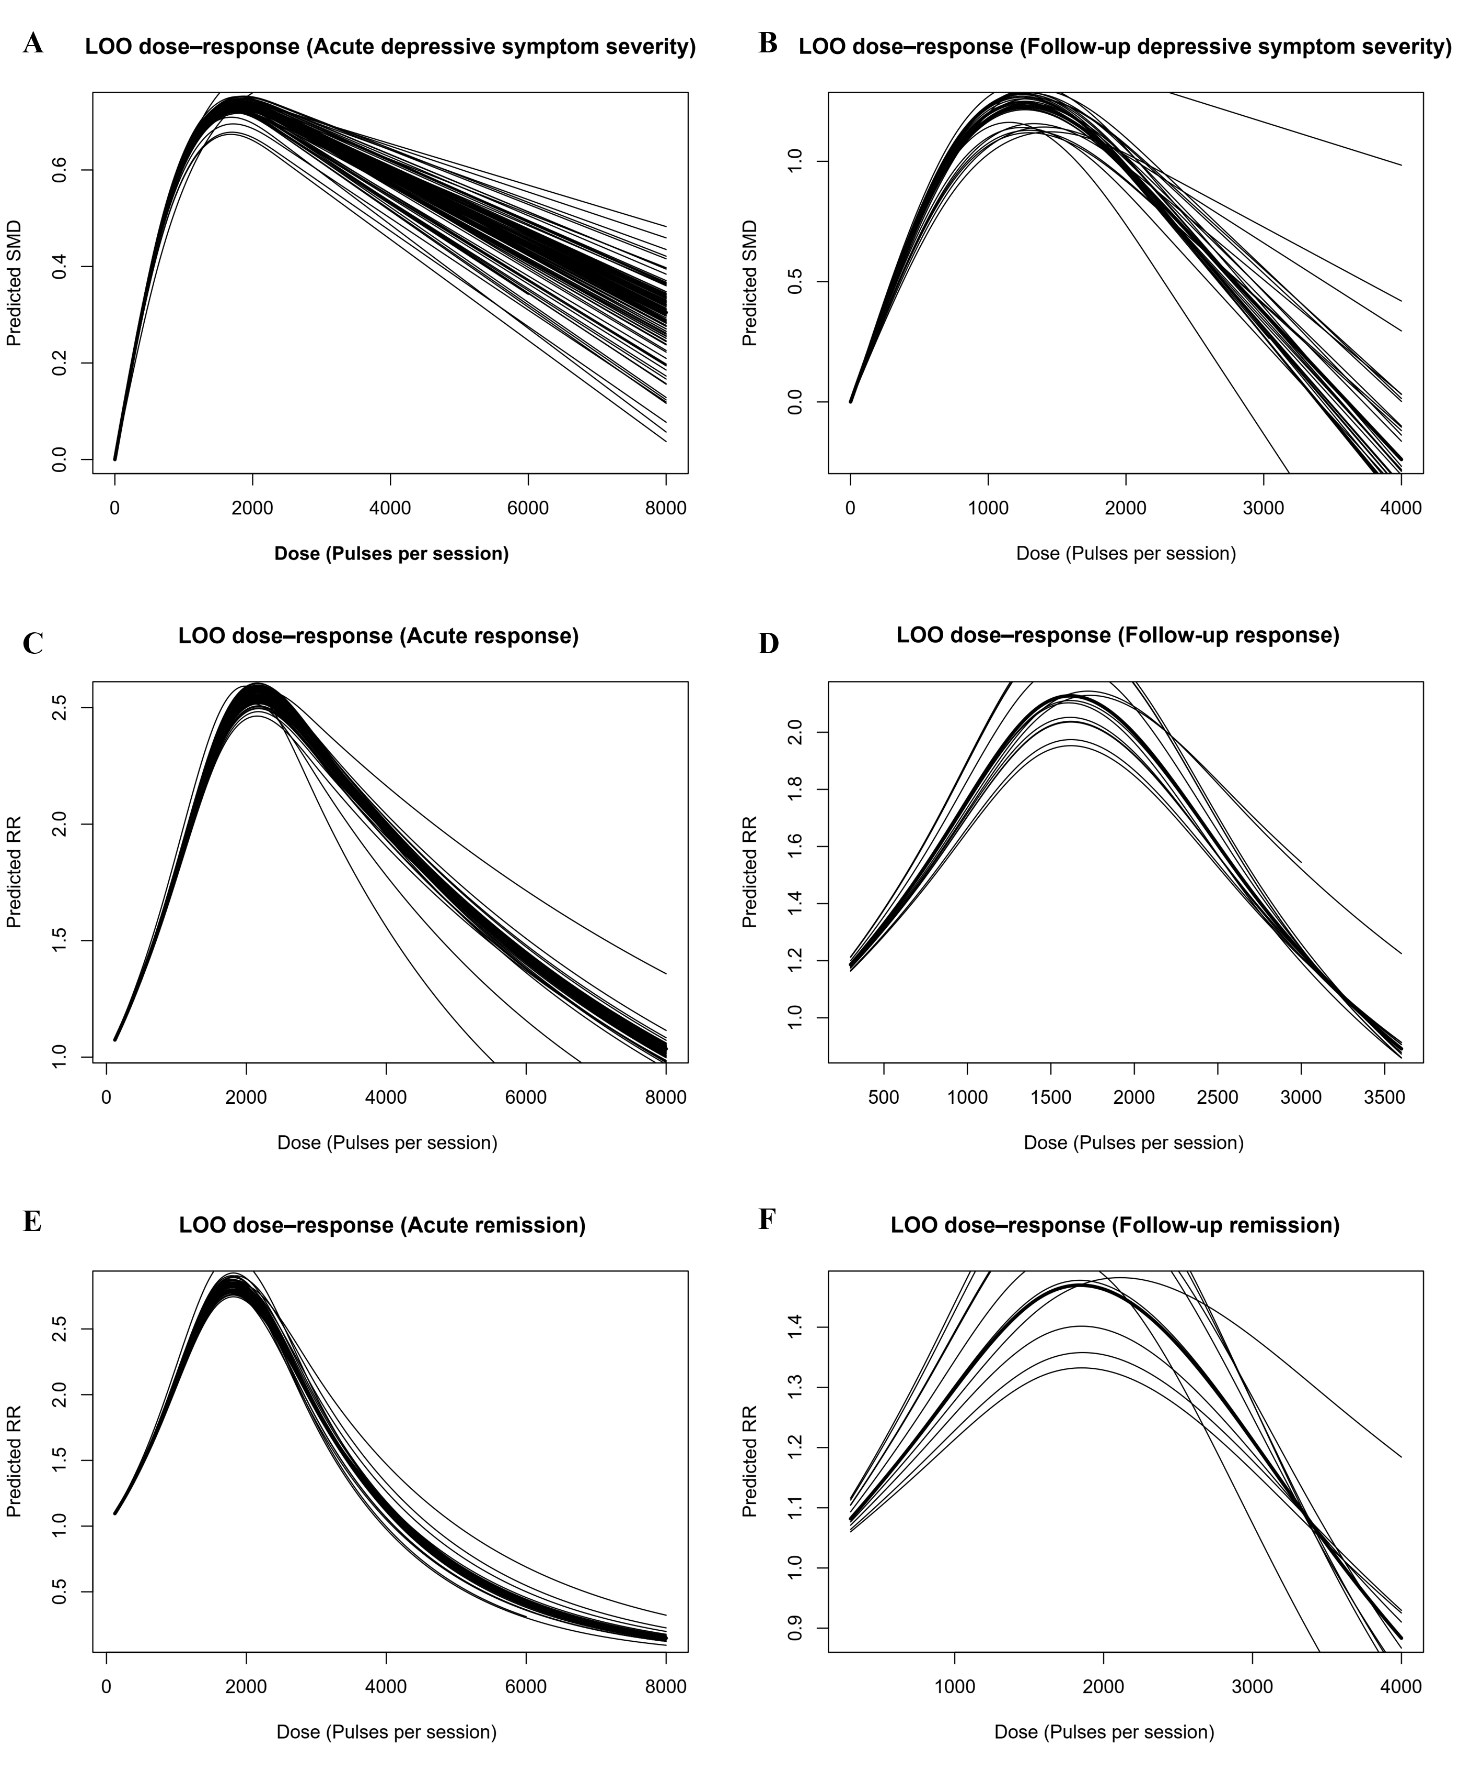


Panels A–F show leave-one-out (LOO) refits of restricted cubic spline models for acute and follow up outcomes (symptom severity, response, and remission).

**Fig. S12**. Leave-one-out sensitivity analyses for total-sessions–based dose–response models of rTMS.


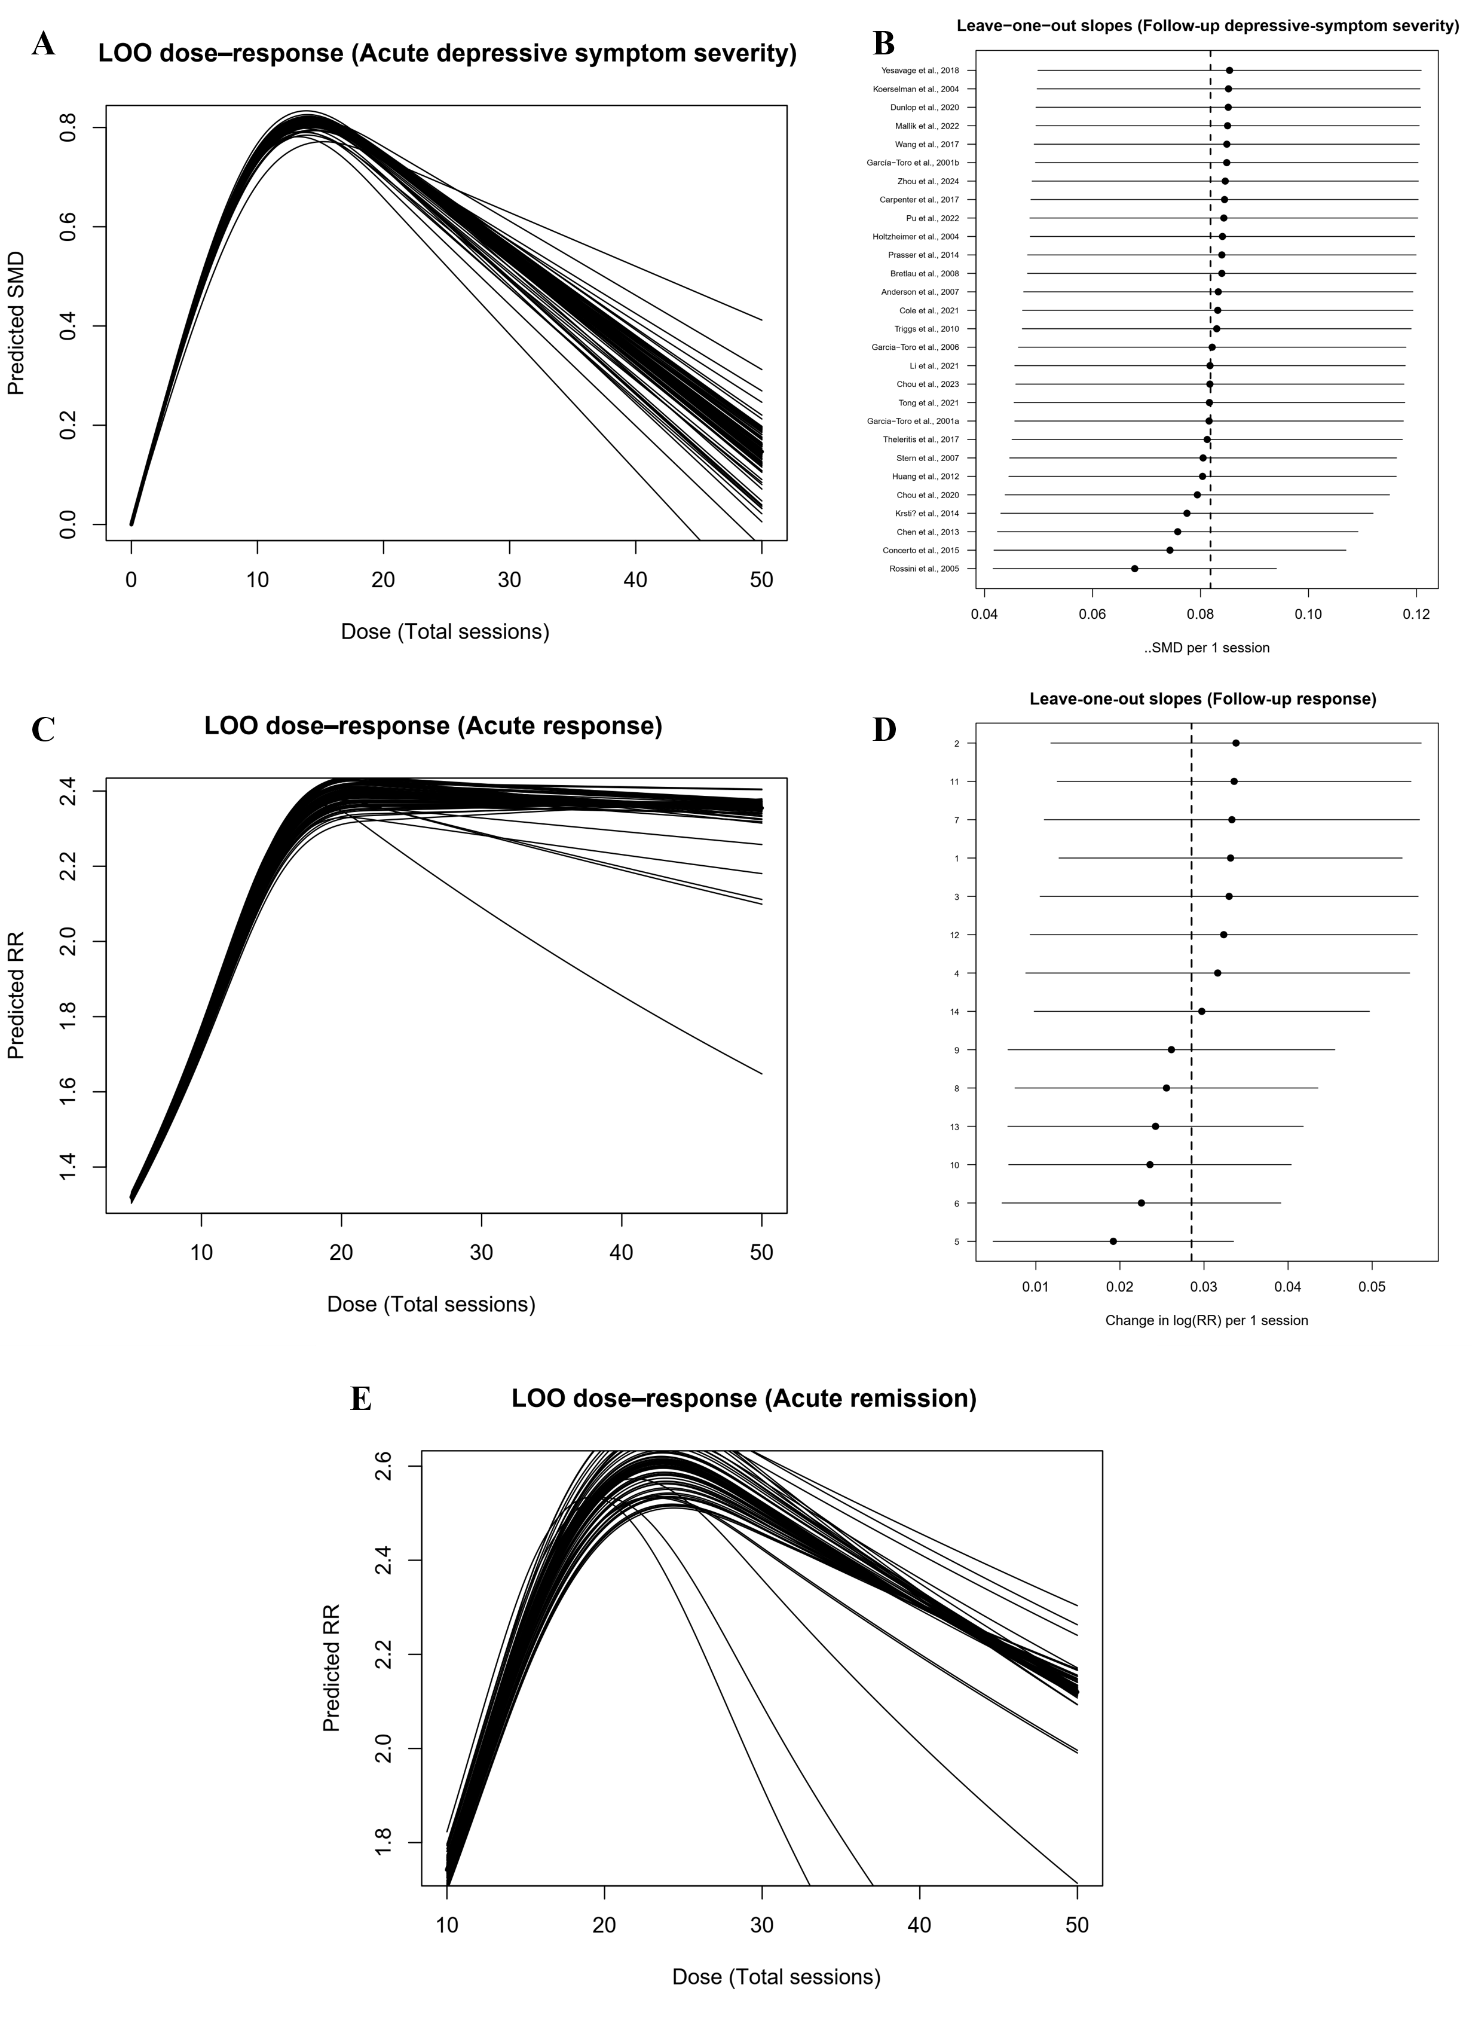


Panels A–E show leave-one-out (LOO) refits of restricted cubic spline models for acute and follow up outcomes (symptom severity, response, and remission), while panels B summarize LOO slopes from one-stage random-effects meta-regression models. **Note:** the follow-up remission model was not significant; therefore, no sensitivity analysis panel is shown for that outcome.

**Fig. S13**. Leave-one-out sensitivity analyses for treatment-duration–based dose–response models of rTMS.


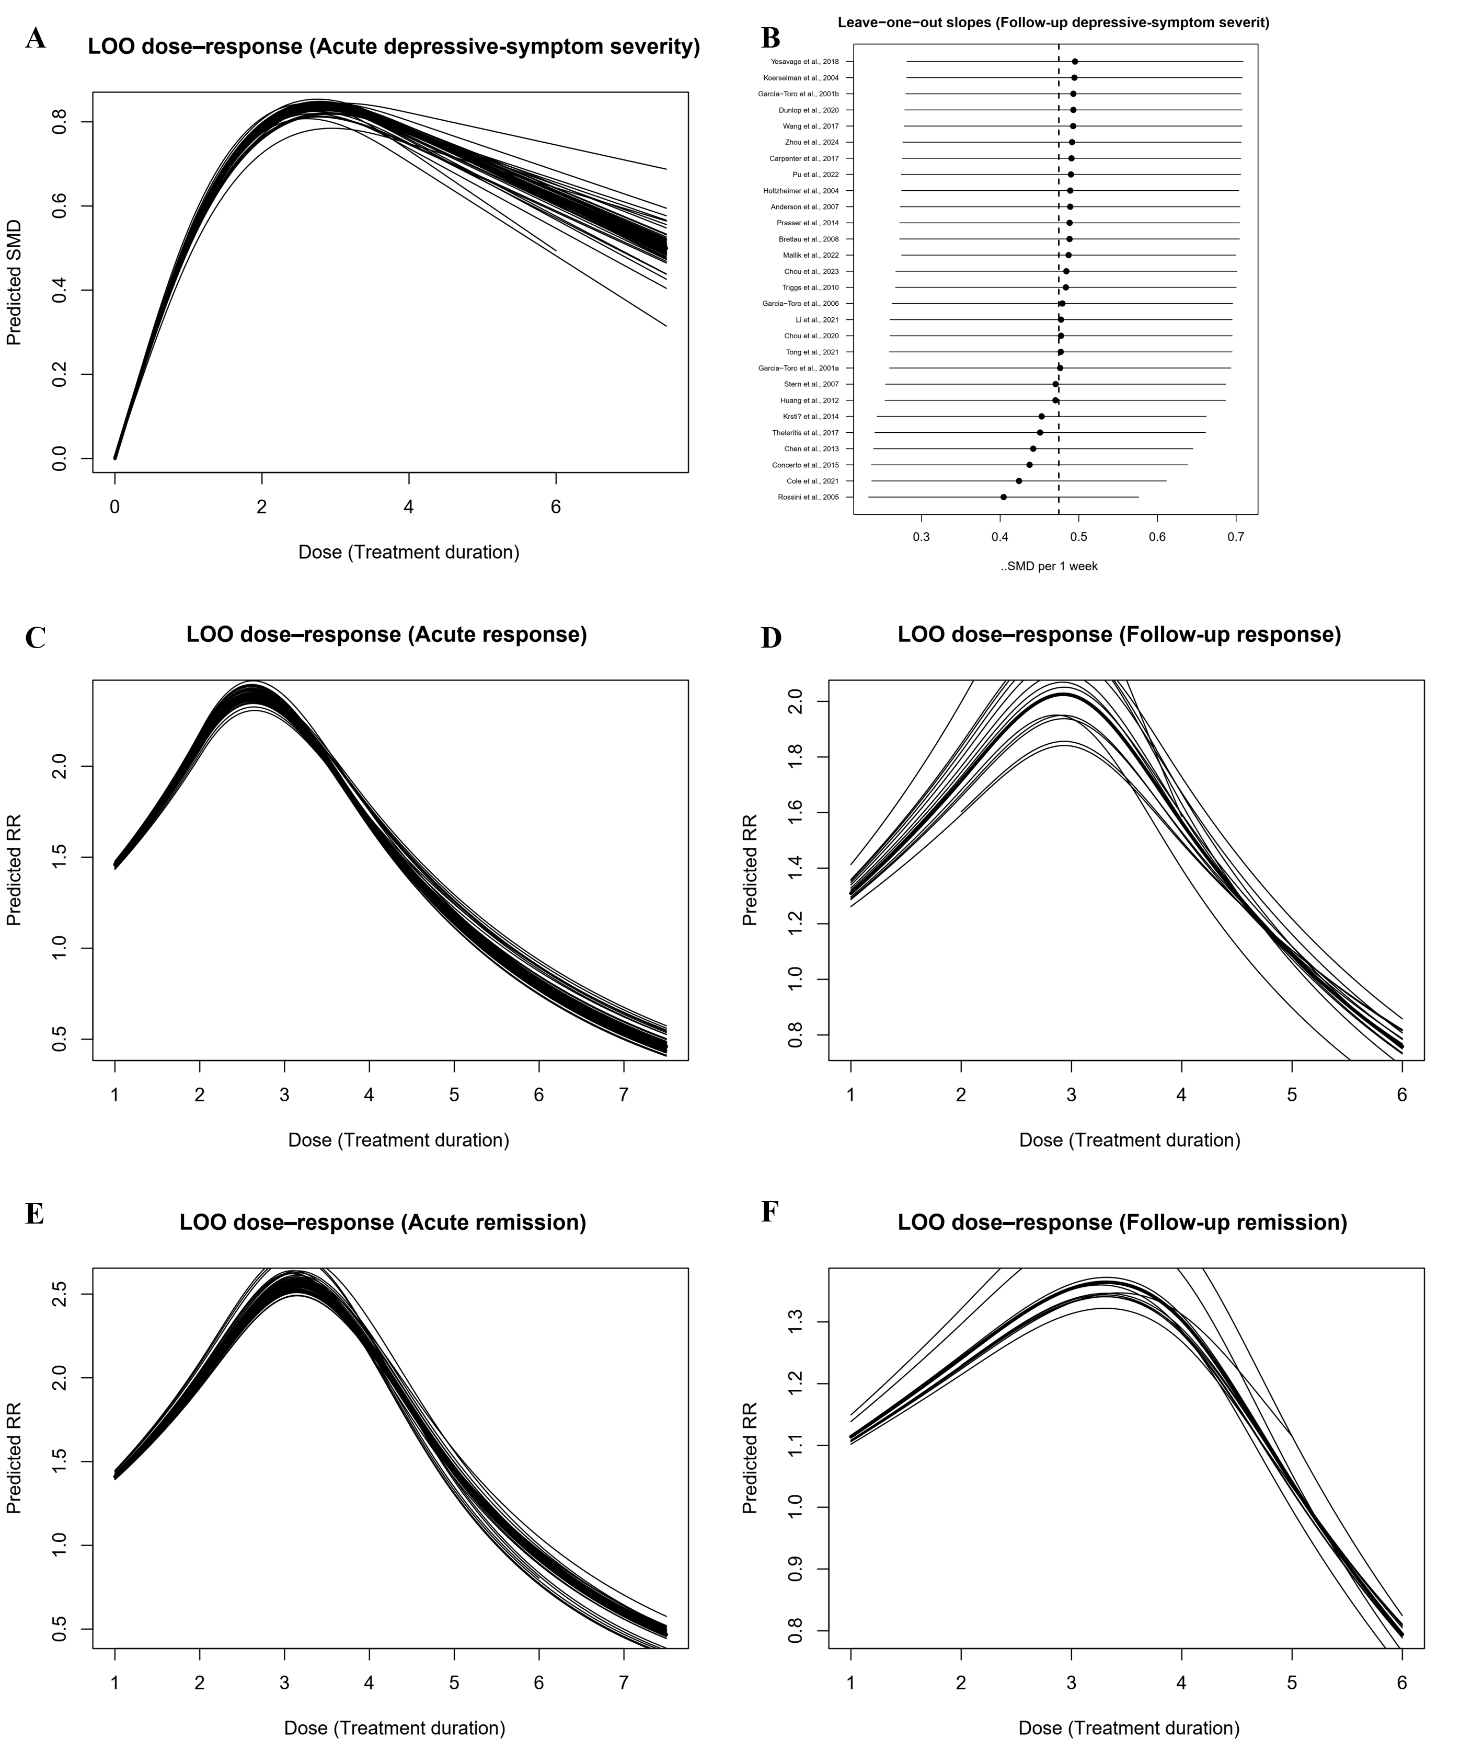


Panels A–F show leave-one-out (LOO) refits of restricted cubic spline models for acute and follow up outcomes (symptom severity, response, and remission), while panels B summarize LOO slopes from one-stage random-effects meta-regression models.

**Fig. S14**. Funnel plots of publication bias for total-pulse–based rTMS dose-response analyses across outcomes.


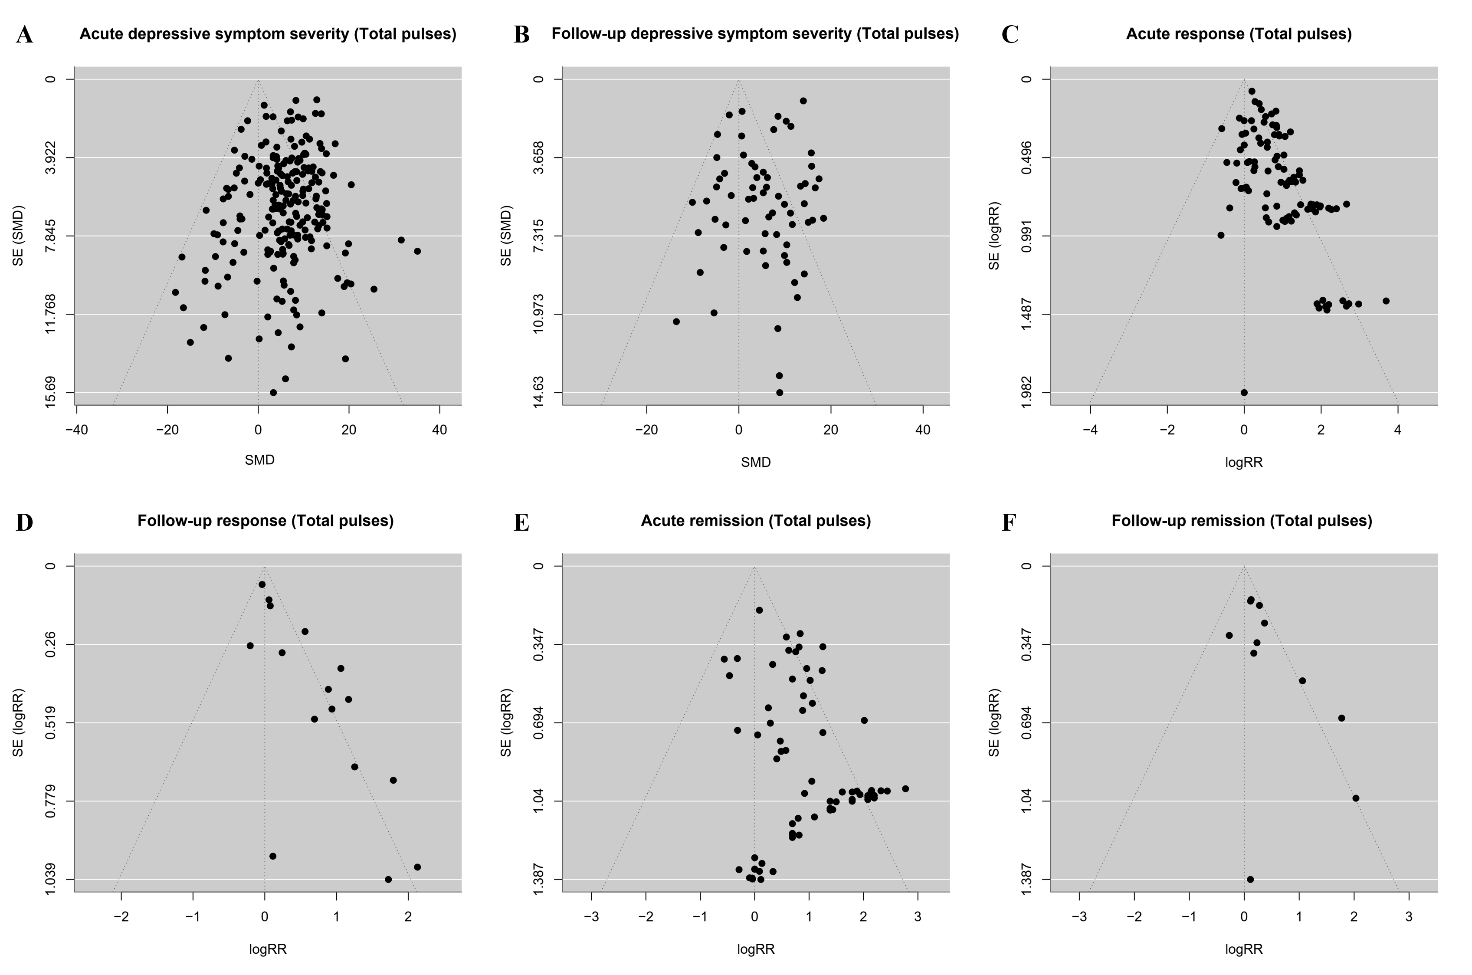


Panels A–F show results for (A) acute depressive symptom severity, (B) follow-up depressive symptom severity, (C) acute response, (D) follow-up response, (E) acute remission, and (F) follow-up remission.

**Fig. S15**. Funnel plots of publication bias for pulse-per-session–based rTMS dose-response analyses across outcomes.


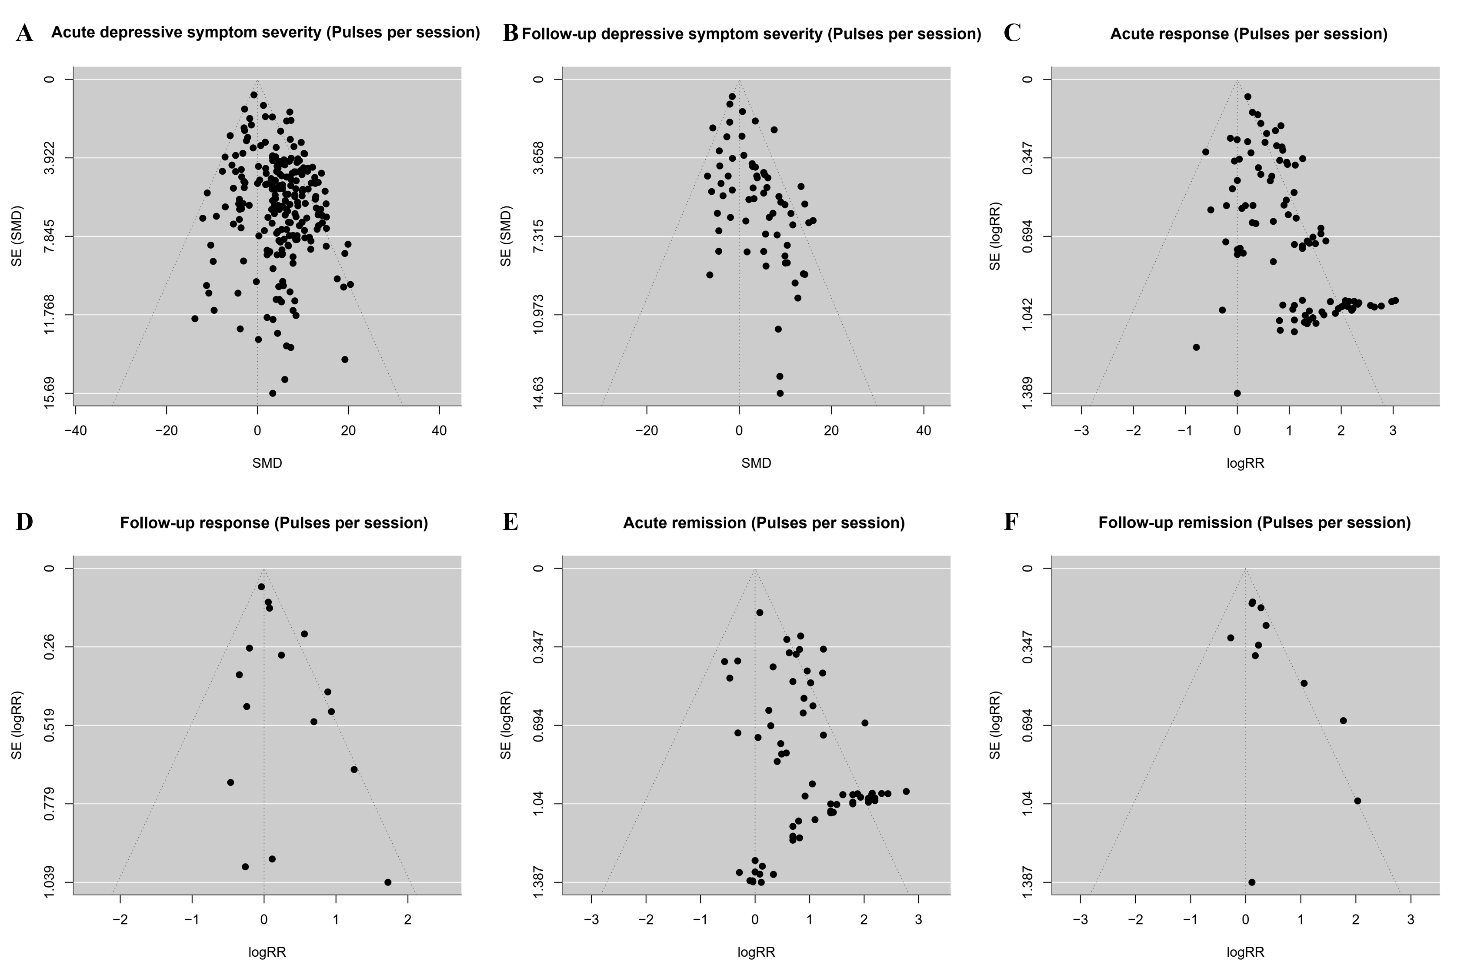


Panels A–F show results for (A) acute depressive symptom severity, (B) follow-up depressive symptom severity, (C) acute response, (D) follow-up response, (E) acute remission, and (F) follow-up remission.

**Fig. S16**. Funnel plots of publication bias for total-sessions–based rTMS dose-response analyses across outcomes.


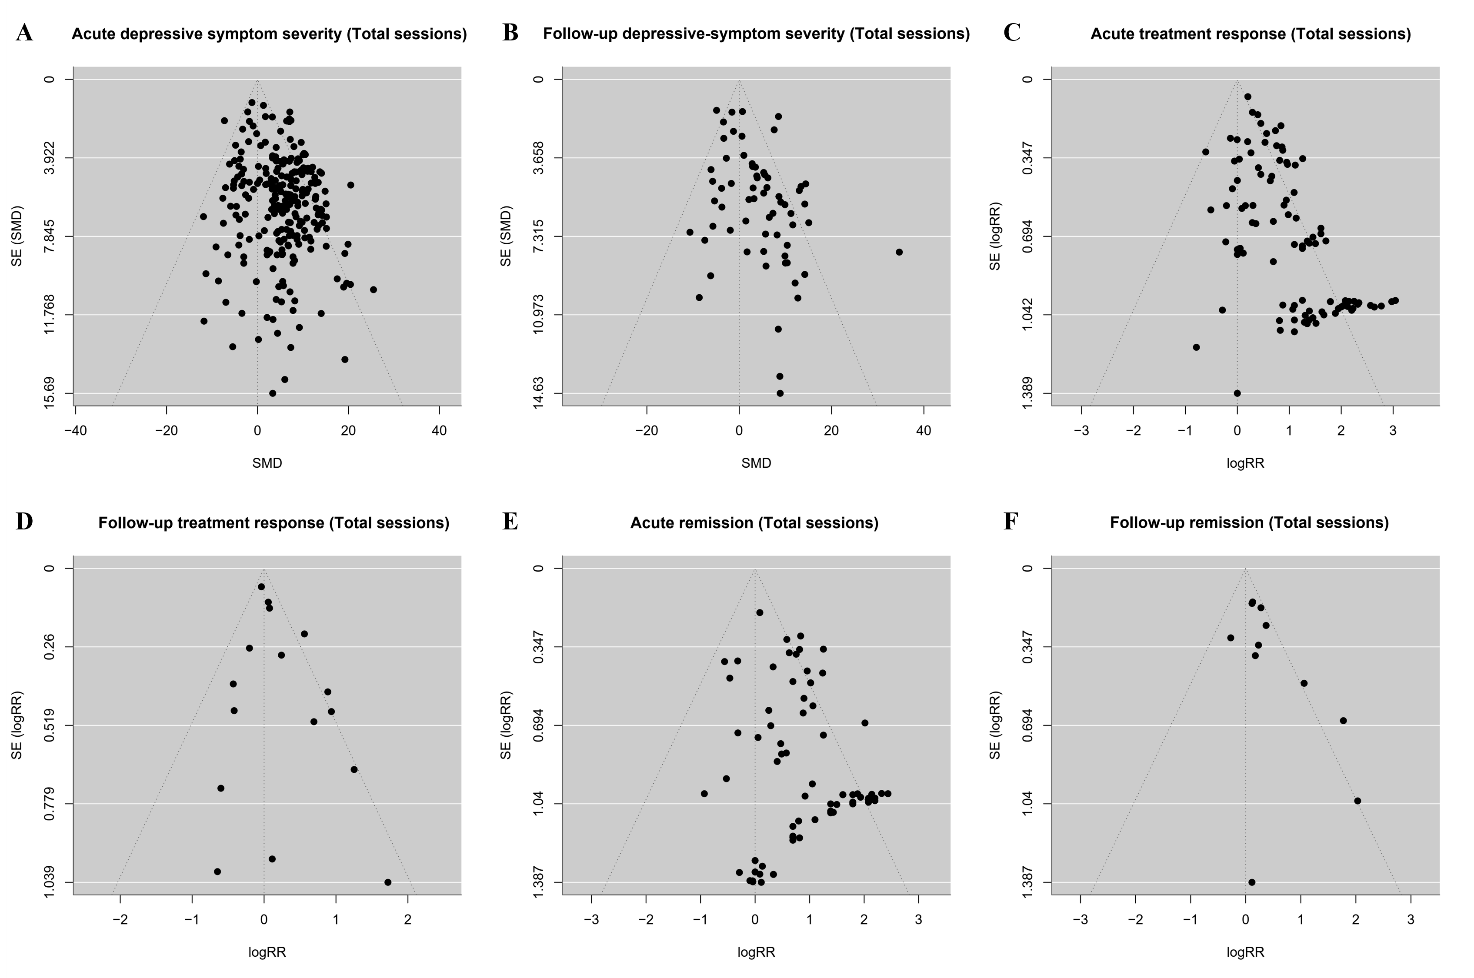


Panels A–F show results for (A) acute depressive symptom severity, (B) follow-up depressive symptom severity, (C) acute response, (D) follow-up response, (E) acute remission, and (F) follow-up remission.

**Fig. S17**. Funnel plots of publication bias for treatment-duration–based rTMS dose-response analyses across outcomes.


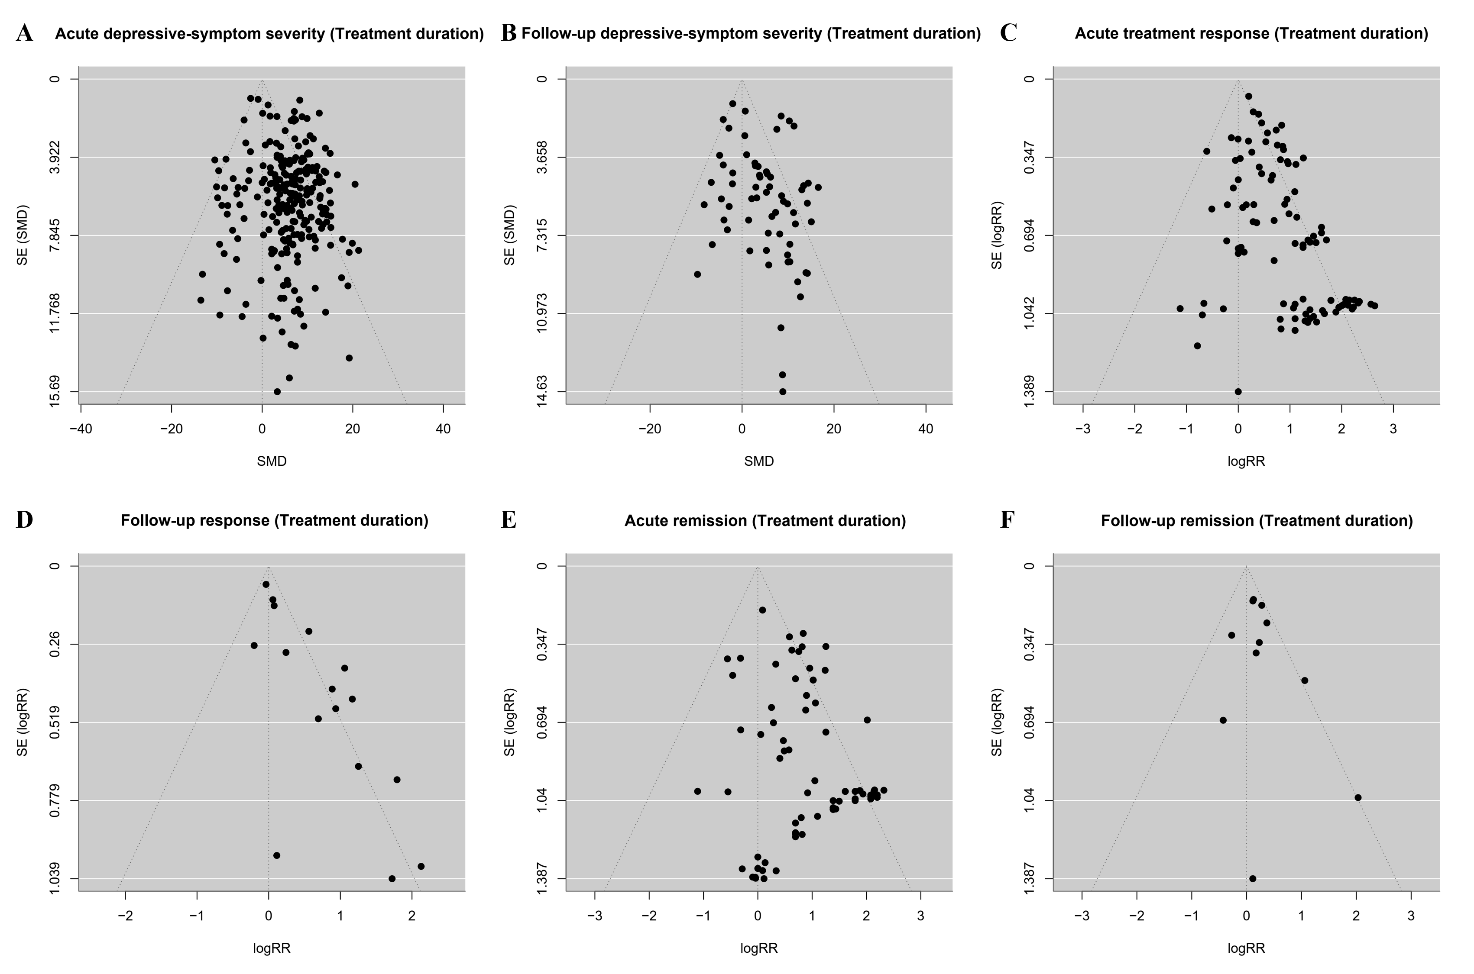


Panels A–F show results for (A) acute depressive symptom severity, (B) follow-up depressive symptom severity, (C) acute response, (D) follow-up response, (E) acute remission, and (F) follow-up remission.

**References**

[1] Akpınar K, Oğuzhanoğlu NK, Uğurlu TT. Efficacy of transcranial magnetic stimulation in treatment-resistant depression. Turk J Med Sci. 2022. 52(4): 1344-1354.

[2] Anderson IM, Delvai NA, Ashim B, et al. Adjunctive fast repetitive transcranial magnetic stimulation in depression. Br J Psychiatry. 2007. 190: 533-4.

[3] Armas-Castañeda G, Ricardo-Garcell J, Reyes JV, Heinze G, Salín RJ, González JJ. Two rTMS sessions per week: a practical approach for treating major depressive disorder. Neuroreport. 2021. 32(17): 1364-1369.

[4] Asgharian Asl F, Vaghef L. The effectiveness of high-frequency left DLPFC-rTMS on depression, response inhibition, and cognitive flexibility in female subjects with major depressive disorder. J Psychiatr Res. 2022. 149: 287-292.

[5] Avery DH, Holtzheimer PE 3rd, Fawaz W, et al. A controlled study of repetitive transcranial magnetic stimulation in medication-resistant major depression. Biol Psychiatry. 2006. 59(2): 187-94.

[6] Bakim B, Uzun UE, Karamustafalioglu O, et al. The Combination of Antidepressant Drug Therapy and High-Frequency Repetitive Transcranial Magnetic Stimulation in Medication-Resistant Depression. Bulletin of Clinical Psychopharmacology. 2012. 22(3): 1.

[7] Bengtsson J, Frick A, Gingnell M. Blinding integrity of dorsomedial prefrontal intermittent theta burst stimulation in depression. Int J Clin Health Psychol. 2023. 23(4): 100390.

[8] Bengtsson J, Olsson E, Persson J, Bodén R. No effects on heart rate variability in depression after treatment with dorsomedial prefrontal intermittent theta burst stimulation. Ups J Med Sci. 2023. 128.

[9] Berman RM, Narasimhan M, Sanacora G, et al. A randomized clinical trial of repetitive transcranial magnetic stimulation in the treatment of major depression. Biol Psychiatry. 2000. 47(4): 332-7.

[10] Blumberger DM, Mulsant BH, Fitzgerald PB, et al. A randomized double-blind sham-controlled comparison of unilateral and bilateral repetitive transcranial magnetic stimulation for treatment-resistant major depression. World J Biol Psychiatry. 2012. 13(6): 423-35.

[11] Boutros NN, Gueorguieva R, Hoffman RE, Oren DA, Feingold A, Berman RM. Lack of a therapeutic effect of a 2-week sub-threshold transcranial magnetic stimulation course for treatment-resistant depression. Psychiatry Res. 2002. 113(3): 245-54.

[12] Bretlau LG, Lunde M, Lindberg L, Undén M, Dissing S, Bech P. Repetitive transcranial magnetic stimulation (rTMS) in combination with escitalopram in patients with treatment-resistant major depression: a double-blind, randomised, sham-controlled trial. Pharmacopsychiatry. 2008. 41(2): 41-7.

[13] Hansen PE, Videbech P, Clemmensen K, Sturlason R, Jensen HM, Vestergaard P. Repetitive transcranial magnetic stimulation as add-on antidepressant treatment. The applicability of the method in a clinical setting. Nord J Psychiatry. 2004. 58(6): 455-7.

[14] Carpenter LL, Aaronson ST, Clarke GN, et al. rTMS with a two-coil array: Safety and efficacy for treatment resistant major depressive disorder. Brain Stimul. 2017. 10(5): 926-933.

[15] Chen SJ, Chang CH, Tsai HC, Chen ST, CCh L. Superior antidepressant effect occurring 1 month after rTMS: add-on rTMS for subjects with medication-resistant depression. Neuropsychiatr Dis Treat. 2013. 9: 397-401.

[16] Cheng CM, Hong CJ, Lin HC, et al. Predictive roles of brain-derived neurotrophic factor Val66Met polymorphism on antidepressant efficacy of different forms of prefrontal brain stimulation monotherapy: A randomized, double-blind, sham-controlled study. J Affect Disord. 2022. 297: 353-359.

[17] Cheng CM, Li CT, Jeng JS, et al. Antidepressant effects of prolonged intermittent theta-burst stimulation monotherapy at the bilateral dorsomedial prefrontal cortex for medication and standard transcranial magnetic stimulation-resistant major depression: a three arm, randomized, double blind, sham-controlled pilot study. Eur Arch Psychiatry Clin Neurosci. 2023. 273(7): 1433-1442.

[18] Chistyakov AV, Kreinin B, Marmor S, et al. Preliminary assessment of the therapeutic efficacy of continuous theta-burst magnetic stimulation (cTBS) in major depression: a double-blind sham-controlled study. J Affect Disord. 2015. 170: 225-9.

[19] Chou PH, Lu MK, Tsai CH, et al. Antidepressant efficacy and immune effects of bilateral theta burst stimulation monotherapy in major depression: A randomized, double-blind, sham-controlled study. Brain Behav Immun. 2020. 88: 144-150.

[20] Chou PH, Tu CH, Chen CM, et al. Bilateral theta-burst stimulation on emotional processing in major depressive disorder: A functional neuroimaging study from a randomized, double-blind, sham-controlled trial. Psychiatry Clin Neurosci. 2023. 77(4): 233-240.

[21] Cole EJ, Phillips AL, Bentzley BS, et al. Stanford Neuromodulation Therapy (SNT): A Double-Blind Randomized Controlled Trial. Am J Psychiatry. 2022. 179(2): 132-141.

[22] Concerto C, Lanza G, Cantone M, et al. Repetitive transcranial magnetic stimulation in patients with drug-resistant major depression: A six-month clinical follow-up study. Int J Psychiatry Clin Pract. 2015. 19(4): 252-8.

[23] Dai L, Wang P, Du H, et al. High-frequency Repetitive Transcranial Magnetic Stimulation (rTMS) Accelerates onset Time of Beneficial Treating Effects and Improves Clinical Symptoms of Depression. CNS Neurol Disord Drug Targets. 2022. 21(6): 500-510.

[24] Dellink A, Hebbrecht K, Zeeuws D, et al. Continuous theta burst stimulation for bipolar depression: A multicenter, double-blind randomized controlled study exploring treatment efficacy and predictive potential of kynurenine metabolites. J Affect Disord. 2024. 361: 693-701.

[25] Dunlop K, Sheen J, Schulze L, et al. Dorsomedial prefrontal cortex repetitive transcranial magnetic stimulation for treatment-refractory major depressive disorder: A three-arm, blinded, randomized controlled trial. Brain Stimul. 2020. 13(2): 337-340.

[26] Duprat R, Desmyter S, Rudi de R, et al. Accelerated intermittent theta burst stimulation treatment in medication-resistant major depression: A fast road to remission. J Affect Disord. 2016. 200: 6-14.

[27] Eschweiler GW, Wegerer C, Schlotter W, et al. Left prefrontal activation predicts therapeutic effects of repetitive transcranial magnetic stimulation (rTMS) in major depression. Psychiatry Res. 2000. 99(3): 161-72.

[28] Fitzgerald PB, Brown TL, Marston NA, Daskalakis ZJ, De Castella A, Kulkarni J. Transcranial magnetic stimulation in the treatment of depression: a double-blind, placebo-controlled trial. Arch Gen Psychiatry. 2003. 60(10): 1002-8.

[29] Fitzgerald PB, Benitez J, de Castella A, Daskalakis ZJ, Brown TL, Kulkarni J. A randomized, controlled trial of sequential bilateral repetitive transcranial magnetic stimulation for treatment-resistant depression. Am J Psychiatry. 2006. 163(1): 88-94.

[30] Fitzgerald PB, Hoy KE, Herring SE, et al. A double blind randomized trial of unilateral left and bilateral prefrontal cortex transcranial magnetic stimulation in treatment resistant major depression. J Affect Disord. 2012. 139(2): 193-8.

[31] Fitzgerald PB, Hoy KE, Elliot D, McQueen S, Wambeek LE, Daskalakis ZJ. A negative double-blind controlled trial of sequential bilateral rTMS in the treatment of bipolar depression. J Affect Disord. 2016. 198: 158-62.

[32] Frick A, Persson J, Bodén R. Habitual caffeine consumption moderates the antidepressant effect of dorsomedial intermittent theta-burst transcranial magnetic stimulation. J Psychopharmacol. 2021. 35(12): 1536-1541.

[33] García-Toro M, Pascual-Leone A, Romera M, et al. Prefrontal repetitive transcranial magnetic stimulation as add on treatment in depression. J Neurol Neurosurg Psychiatry. 2001. 71(4): 546-8.

[34] Garcia-Toro M, Mayol A, Arnillas H, et al. Modest adjunctive benefit with transcranial magnetic stimulation in medication-resistant depression. J Affect Disord. 2001. 64(2-3): 271-5.

[35] Garcia-Toro M, Salva J, Daumal J, et al. High (20-Hz) and low (1-Hz) frequency transcranial magnetic stimulation as adjuvant treatment in medication-resistant depression. Psychiatry Res. 2006. 146(1): 53-7.

[36] George MS, Wassermann EM, Kimbrell TA, et al. Mood improvement following daily left prefrontal repetitive transcranial magnetic stimulation in patients with depression: a placebo-controlled crossover trial. Am J Psychiatry. 1997. 154(12): 1752-6.

[37] George MS, Nahas Z, Molloy M, et al. A controlled trial of daily left prefrontal cortex TMS for treating depression. Biol Psychiatry. 2000. 48(10): 962-70.

[38] George MS, Lisanby SH, Avery D, et al. Daily left prefrontal transcranial magnetic stimulation therapy for major depressive disorder: a sham-controlled randomized trial. Arch Gen Psychiatry. 2010. 67(5): 507-16.

[39] Hernández-Ribas R, Deus J, Pujol J, et al. Identifying brain imaging correlates of clinical response to repetitive transcranial magnetic stimulation (rTMS) in major depression. Brain Stimul. 2013. 6(1): 54-61.

[40] Herwig U, Lampe Y, Juengling FD, et al. Add-on rTMS for treatment of depression: a pilot study using stereotaxic coil-navigation according to PET data. J Psychiatr Res. 2003. 37(4): 267-75.

[41] Herwig U, Fallgatter AJ, Höppner J, et al. Antidepressant effects of augmentative transcranial magnetic stimulation: randomised multicentre trial. Br J Psychiatry. 2007. 191: 441-8.

[42] Holtzheimer PE 3rd, Russo J, Claypoole KH, Roy-Byrne P, Avery DH. Shorter duration of depressive episode may predict response to repetitive transcranial magnetic stimulation. Depress Anxiety. 2004. 19(1): 24-30.

[43] Höppner J, Schulz M, Irmisch G, Mau R, Schläfke D, Richter J. Antidepressant efficacy of two different rTMS procedures. High frequency over left versus low frequency over right prefrontal cortex compared with sham stimulation. Eur Arch Psychiatry Clin Neurosci. 2003. 253(2): 103-9.

[44] Hu SH, Lai JB, Xu DR, et al. Efficacy of repetitive transcranial magnetic stimulation with quetiapine in treating bipolar II depression: a randomized, double-blinded, control study. Sci Rep. 2016. 6: 30537.

[45] Huang ML, Luo BY, Hu JB, et al. Repetitive transcranial magnetic stimulation in combination with citalopram in young patients with first-episode major depressive disorder: a double-blind, randomized, sham-controlled trial. Aust N Z J Psychiatry. 2012. 46(3): 257-64.

[46] Januel D, Dumortier G, Verdon CM, et al. A double-blind sham controlled study of right prefrontal repetitive transcranial magnetic stimulation (rTMS): therapeutic and cognitive effect in medication free unipolar depression during 4 weeks. Prog Neuropsychopharmacol Biol Psychiatry. 2006. 30(1): 126-30.

[47] Kauffmann CD, Cheema MA, Miller BE. Slow right prefrontal transcranial magnetic stimulation as a treatment for medication-resistant depression: a double-blind, placebo-controlled study. Depress Anxiety. 2004. 19(1): 59-62.

[48] Kazemi R, Rostami R, Nasiri Z, et al. Electrophysiological and behavioral effects of unilateral and bilateral rTMS; A randomized clinical trial on rumination and depression. J Affect Disord. 2022. 317: 360-372.

[49] Koerselman F, Laman DM, van Duijn H, van Duijn MA, Willems MA. A 3-month, follow-up, randomized, placebo-controlled study of repetitive transcranial magnetic stimulation in depression. J Clin Psychiatry. 2004. 65(10): 1323-8.

[50] Kreuzer PM, Schecklmann M, Lehner A, et al. The ACDC pilot trial: targeting the anterior cingulate by double cone coil rTMS for the treatment of depression. Brain Stimul. 2015. 8(2): 240-6.

[51] Krstić J, Buzadžić I, Milanović SD, Ilić NV, Pajić S, Ilić TV. Low-frequency repetitive transcranial magnetic stimulation in the right prefrontal cortex combined with partial sleep deprivation in treatment-resistant depression: a randomized sham-controlled trial. J ECT. 2014. 30(4): 325-31.

[52] Levkovitz Y, Isserles M, Padberg F, et al. Efficacy and safety of deep transcranial magnetic stimulation for major depression: a prospective multicenter randomized controlled trial. World Psychiatry. 2015. 14(1): 64-73.

[53] Li CT, Chen MH, Juan CH, et al. Efficacy of prefrontal theta-burst stimulation in refractory depression: a randomized sham-controlled study. Brain. 2014. 137(Pt 7): 2088-98.

[54] Li CT, Cheng CM, Juan CH, et al. Task-Modulated Brain Activity Predicts Antidepressant Responses of Prefrontal Repetitive Transcranial Magnetic Stimulation: A Randomized Sham-Control Study. Chronic Stress (Thousand Oaks). 2021. 5: 24705470211006855.

[55] Li X, Yu C, Ding Y, et al. Motor cortical plasticity as a predictor of treatment response to high frequency repetitive transcranial magnetic stimulation (rTMS) for cognitive function in drug-naive patients with major depressive disorder. J Affect Disord. 2023. 334: 180-186.

[56] Li CT, Cheng CM, Lin HC, et al. The longer, the better ? Longer left-sided prolonged intermittent theta burst stimulation in patients with major depressive disorder: A randomized sham-controlled study. Asian J Psychiatr. 2023. 87: 103686.

[57] Li X, Liu J, Wei S, et al. Cognitive enhancing effect of rTMS combined with tDCS in patients with major depressive disorder: a double-blind, randomized, sham-controlled study. BMC Med. 2024. 22(1): 253.

[58] Lingeswaran A. Repetitive Transcranial Magnetic Stimulation in the Treatment of depression: A Randomized, Double-blind, Placebo-controlled Trial. Indian J Psychol Med. 2011. 33(1): 35-44.

[59] Loo CK, Mitchell PB, Croker VM, et al. Double-blind controlled investigation of bilateral prefrontal transcranial magnetic stimulation for the treatment of resistant major depression. Psychol Med. 2003. 33(1): 33-40.

[60] Loo CK, Mitchell PB, McFarquhar TF, Malhi GS, Sachdev PS. A sham-controlled trial of the efficacy and safety of twice-daily rTMS in major depression. Psychol Med. 2007. 37(3): 341-9.

[61] Mak A, Neggers S, Leung O, et al. Antidepressant efficacy of low-frequency repetitive transcranial magnetic stimulation in antidepressant-nonresponding bipolar depression: a single-blind randomized sham-controlled trial. Int J Bipolar Disord. 2021. 9(1): 40.

[62] Mallik G, Mishra P, Garg S, Dhyani M, Tikka SK, Tyagi P. Safety and Efficacy of Continuous Theta Burst "Intensive" Stimulation in Acute-Phase Bipolar Depression: A Pilot, Exploratory Study. J ECT. 2023. 39(1): 28-33.

[63] Paillère Martinot ML, Galinowski A, Ringuenet D, et al. Influence of prefrontal target region on the efficacy of repetitive transcranial magnetic stimulation in patients with medication-resistant depression: a [(18)F]-fluorodeoxyglucose PET and MRI study. Int J Neuropsychopharmacol. 2010. 13(1): 45-59.

[64] Matsuda Y, Kito S, Igarashi Y, Shigeta M. Efficacy and Safety of Deep Transcranial Magnetic Stimulation in Office Workers with Treatment-Resistant Depression: A Randomized, Double-Blind, Sham-Controlled Trial. Neuropsychobiology. 2020. 79(3): 208-213.

[65] McDonald WM, Easley K, Byrd EH, et al. Combination rapid transcranial magnetic stimulation in treatment refractory depression. Neuropsychiatr Dis Treat. 2006. 2(1): 85-94.

[66] McGirr A, Vila-Rodriguez F, Cole J, et al. Efficacy of Active vs Sham Intermittent Theta Burst Transcranial Magnetic Stimulation for Patients With Bipolar Depression: A Randomized Clinical Trial. JAMA Netw Open. 2021. 4(3): e210963.

[67] Mogg A, Pluck G, Eranti SV, et al. A randomized controlled trial with 4-month follow-up of adjunctive repetitive transcranial magnetic stimulation of the left prefrontal cortex for depression. Psychol Med. 2008. 38(3): 323-33.

[68] Murgaš M, Unterholzner J, Stöhrmann P, et al. Effects of bilateral sequential theta-burst stimulation on 5-HT(1A) receptors in the dorsolateral prefrontal cortex in treatment-resistant depression: a proof-of-concept trial. Transl Psychiatry. 2023. 13(1): 33.

[69] Nahas Z, Kozel FA, Li X, Anderson B, George MS. Left prefrontal transcranial magnetic stimulation (TMS) treatment of depression in bipolar affective disorder: a pilot study of acute safety and efficacy. Bipolar Disord. 2003. 5(1): 40-7.

[70] Novák T, Kostýlková L, Bareš M, et al. Right ventrolateral and left dorsolateral 10 Hz transcranial magnetic stimulation as an add-on treatment for bipolar I and II depression: a double-blind, randomised, three-arm, sham-controlled study. World J Biol Psychiatry. 2024. 25(5): 304-316.

[71] O'Reardon JP, Solvason HB, Janicak PG, et al. Efficacy and safety of transcranial magnetic stimulation in the acute treatment of major depression: a multisite randomized controlled trial. Biol Psychiatry. 2007. 62(11): 1208-16.

[72] Rumi DO, Gattaz WF, Rigonatti SP, et al. Transcranial magnetic stimulation accelerates the antidepressant effect of amitriptyline in severe depression: a double-blind placebo-controlled study. Biol Psychiatry. 2005. 57(2): 162-6.

[73] Padberg F, Zwanzger P, Keck ME, et al. Repetitive transcranial magnetic stimulation (rTMS) in major depression: relation between efficacy and stimulation intensity. Neuropsychopharmacology. 2002. 27(4): 638-45.

[74] Pallanti S, Bernardi S, Di Rollo A, Antonini S, Quercioli L. Unilateral low frequency versus sequential bilateral repetitive transcranial magnetic stimulation: is simpler better for treatment of resistant depression. Neuroscience. 2010. 167(2): 323-8.

[75] Pan F, Shen Z, Jiao J, et al. Neuronavigation-Guided rTMS for the Treatment of Depressive Patients With Suicidal Ideation: A Double-Blind, Randomized, Sham-Controlled Trial. Clin Pharmacol Ther. 2020. 108(4): 826-832.

[76] Pan F, Mou T, Shao J, et al. Effects of neuronavigation-guided rTMS on serum BDNF, TrkB and VGF levels in depressive patients with suicidal ideation. J Affect Disord. 2023. 323: 617-623.

[77] Plewnia C, Pasqualetti P, Große S, et al. Treatment of major depression with bilateral theta burst stimulation: a randomized controlled pilot trial. J Affect Disord. 2014. 156: 219-23.

[78] Prasser J, Schecklmann M, Poeppl TB, et al. Bilateral prefrontal rTMS and theta burst TMS as an add-on treatment for depression: a randomized placebo controlled trial. World J Biol Psychiatry. 2015. 16(1): 57-65.

[79] Pu Z, Hou Q, Yan H, Lin Y, Guo Z. Efficacy of repetitive transcranial magnetic stimulation and agomelatine on sleep quality and biomarkers of adult patients with mild to moderate depressive disorder. J Affect Disord. 2023. 323: 55-61.

[80] Ramos M, Goerigk S, Aparecida da Silva V, et al. Accelerated Theta-Burst Stimulation for Treatment-Resistant Depression: A Randomized Clinical Trial. JAMA Psychiatry. 2025. 82(5): 442-450.

[81] Ray S, Nizamie SH, Akhtar S, Praharaj SK, Mishra BR, Zia-ul-Haq M. Efficacy of adjunctive high frequency repetitive transcranial magnetic stimulation of left prefrontal cortex in depression: a randomized sham controlled study. J Affect Disord. 2011. 128(1-2): 153-9.

[82] Rossini D, Lucca A, Zanardi R, Magri L, Smeraldi E. Transcranial magnetic stimulation in treatment-resistant depressed patients: a double-blind, placebo-controlled trial. Psychiatry Res. 2005. 137(1-2): 1-10.

[83] Rossini D, Magri L, Lucca A, Giordani S, Smeraldi E, Zanardi R. Does rTMS hasten the response to escitalopram, sertraline, or venlafaxine in patients with major depressive disorder? A double-blind, randomized, sham-controlled trial. J Clin Psychiatry. 2005. 66(12): 1569-75.

[84] Rothärmel M, Quesada P, Husson T, et al. The priming effect of repetitive transcranial magnetic stimulation on clinical response to electroconvulsive therapy in treatment-resistant depression: a randomized, double-blind, sham-controlled study. Psychol Med. 2023. 53(5): 2060-2071.

[85] Sheline YI, Makhoul W, Batzdorf AS, et al. Accelerated Intermittent Theta-Burst Stimulation and Treatment-Refractory Bipolar Depression: A Randomized Clinical Trial. JAMA Psychiatry. 2024. 81(9): 936-941.

[86] Speer AM, Wassermann EM, Benson BE, Herscovitch P, Post RM. Antidepressant efficacy of high and low frequency rTMS at 110% of motor threshold versus sham stimulation over left prefrontal cortex. Brain Stimul. 2014. 7(1): 36-41.

[87] Stern WM, Tormos JM, Press DZ, Pearlman C, Pascual-Leone A. Antidepressant effects of high and low frequency repetitive transcranial magnetic stimulation to the dorsolateral prefrontal cortex: a double-blind, randomized, placebo-controlled trial. J Neuropsychiatry Clin Neurosci. 2007. 19(2): 179-86.

[88] Struckmann W, Persson J, Weigl W, Gingnell M, Bodén R. Modulation of the prefrontal blood oxygenation response to intermittent theta-burst stimulation in depression: A sham-controlled study with functional near-infrared spectroscopy. World J Biol Psychiatry. 2021. 22(4): 247-256.

[89] Su TP, Huang CC, Wei IH. Add-on rTMS for medication-resistant depression: a randomized, double-blind, sham-controlled trial in Chinese patients. J Clin Psychiatry. 2005. 66(7): 930-7.

[90] Tavares DF, Suen P, Rodrigues Dos Santos CG, et al. Treatment of mixed depression with theta-burst stimulation (TBS): results from a double-blind, randomized, sham-controlled clinical trial. Neuropsychopharmacology. 2021. 46(13): 2257-2265.

[91] Theleritis C, Sakkas P, Paparrigopoulos T, et al. Two Versus One High-Frequency Repetitive Transcranial Magnetic Stimulation Session per Day for Treatment-Resistant Depression: A Randomized Sham-Controlled Trial. Response to Andrade and Colleagues. J ECT. 2017. 33(2): 143.

[92] Tong J, Zhang J, Jin Y, et al. Impact of Repetitive Transcranial Magnetic Stimulation (rTMS) on Theory of Mind and Executive Function in Major Depressive Disorder and Its Correlation with Brain-Derived Neurotrophic Factor (BDNF): A Randomized, Double-Blind, Sham-Controlled Trial. Brain Sci. 2021. 11(6): 765.

[93] Triggs WJ, Ricciuti N, Ward HE, et al. Right and left dorsolateral pre-frontal rTMS treatment of refractory depression: a randomized, sham-controlled trial. Psychiatry Res. 2010. 178(3): 467-74.

[94] Tsai YC, Li CT, Liang WK, et al. Critical role of rhythms in prefrontal transcranial magnetic stimulation for depression: A randomized sham-controlled study. Hum Brain Mapp. 2022. 43(5): 1535-1547.

[95] Tura A, Promet L, Goya-Maldonado R. Structural-functional connectomics in major depressive disorder following aiTBS treatment. Psychiatry Res. 2024. 342: 116217.

[96] Ullrich H, Kranaster L, Sigges E, Andrich J, Sartorius A. Ultra-high-frequency left prefrontal transcranial magnetic stimulation as augmentation in severely ill patients with depression: a naturalistic sham-controlled, double-blind, randomized trial. Neuropsychobiology. 2012. 66(3): 141-8.

[97] Wang YM, Li N, Yang LL, et al. Randomized controlled trial of repetitive transcranial magnetic stimulation combined with paroxetine for the treatment of patients with first-episode major depressive disorder. Psychiatry Res. 2017. 254: 18-23.

[98] Wang X, He K, Chen T, et al. Therapeutic efficacy of connectivity-directed transcranial magnetic stimulation on anticipatory anhedonia. Depress Anxiety. 2021. 38(9): 972-984.

[99] Wilkening J, Witteler F, Goya-Maldonado R. Suicidality and relief of depressive symptoms with intermittent theta burst stimulation in a sham-controlled randomized clinical trial. Acta Psychiatr Scand. 2022. 146(6): 540-556.

[100] Yesavage JA, Fairchild JK, Mi Z, et al. Effect of Repetitive Transcranial Magnetic Stimulation on Treatment-Resistant Major Depression in US Veterans: A Randomized Clinical Trial. JAMA Psychiatry. 2018. 75(9): 884-893.

[101] Yıldız T, Oğuzhanoğlu NK, Topak OZ. Cognitive outcomes of transcranial magnetic stimulation in treatment-resistant depression: a randomized controlled study. Turk J Med Sci. 2023. 53(1): 253-263.

[102] Yu F, Huang Y, Chen T, et al. Repetitive transcranial magnetic stimulation promotes response inhibition in patients with major depression during the stop-signal task. J Psychiatr Res. 2022. 151: 427-438.

[103] Zavorotnyy M, Zöllner R, Rekate H, et al. Intermittent theta-burst stimulation moderates interaction between increment of N-Acetyl-Aspartate in anterior cingulate and improvement of unipolar depression. Brain Stimul. 2020. 13(4): 943-952.

[104] Zengin G, Topak OZ, Atesci O, Culha Atesci F. The Efficacy and Safety of Transcranial Magnetic Stimulation in Treatment-Resistant Bipolar Depression. Psychiatr Danub. 2022. 34(2): 236-244.

[105] Zhang Z, Zhang H, Xie CM, et al. Task-related functional magnetic resonance imaging-based neuronavigation for the treatment of depression by individualized repetitive transcranial magnetic stimulation of the visual cortex. Sci China Life Sci. 2021. 64(1): 96-106.

[106] Zheng H, Zhang L, Li L, et al. High-frequency rTMS treatment increases left prefrontal myo-inositol in young patients with treatment-resistant depression. Prog Neuropsychopharmacol Biol Psychiatry. 2010. 34(7): 1189-95.

[107] Zheng H, Jia F, Guo G, et al. Abnormal Anterior Cingulate N-Acetylaspartate and Executive Functioning in Treatment-Resistant Depression After rTMS Therapy. Int J Neuropsychopharmacol. 2015. 18(11): pyv059.

[108] Zhou D, Li X, Wei S, et al. Transcranial Direct Current Stimulation Combined With Repetitive Transcranial Magnetic Stimulation for Depression: A Randomized Clinical Trial. JAMA Netw Open. 2024. 7(11): e2444306.
